# Supplementary material for: Saline-Alkali Soil Property Improved by the Synergistic Effects of Priestia aryabhattai JL-5, Staphylococcus pseudoxylosus XW-4, Leymus chinensis and Soil Microbiota
Source: MDPI journal article supplement (doi:10.3390/ijms24097737), 2023-04-23
Supplement: s1 [file s1]

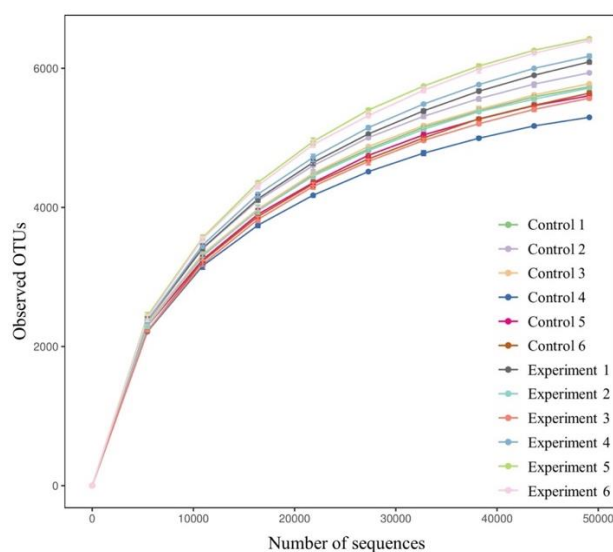

**Figure S1.** Rarefaction curves of bacterial operational taxonomic units (OTUs) in a total of 6 control (without bacterial treatment) and 6 experimental (treated with bacterial mixture of *Priestia aryabhattai* JL-5 and *Staphylococcus pseudoxylus* XW-4 with the ratio of 2:1) groups of soil samples.
