# Supplementary material for: Saline-Alkali Soil Property Improved by the Synergistic Effects of Priestia aryabhattai JL-5, Staphylococcus pseudoxylosus XW-4, Leymus chinensis and Soil Microbiota
Source: MDPI journal article supplement (doi:10.3390/ijms24097737), 2023-04-23
Supplement: s1 [file s1]

**Table S2.** Alpha diversity analysis of the microbial community in the soils of 6 control groups treated with no bacterial solutions and 6 experimental groups treated with mixed bacterial solutions of both *Priestia aryabhattai* JL-5 and *Staphylococcus pseudoxylus* XW-4 (with the ratio of 2:1).

| Sample             | Chao1 | Simpson | Shannon | Observed species | Good's coverage |
|--------------------|-------|---------|---------|------------------|-----------------|
| Control group      |       |         |         |                  |                 |
| Control 1          | 6191  | 0.998   | 11.088  | 5733             | 0.976           |
| Control 2          | 6565  | 0.998   | 11.171  | 5936             | 0.972           |
| Control 3          | 6431  | 0.998   | 11.117  | 5774             | 0.973           |
| Control 4          | 5689  | 0.998   | 10.966  | 5295             | 0.979           |
| Control 5          | 6173  | 0.998   | 11.049  | 5610             | 0.975           |
| Control 6          | 6537  | 0.996   | 10.811  | 5646             | 0.970           |
| Experimental group |       |         |         |                  |                 |
| Experiment 1       | 7016  | 0.998   | 11.160  | 6090             | 0.968           |
| Experiment 2       | 6282  | 0.998   | 11.046  | 5714             | 0.974           |
| Experiment 3       | 6242  | 0.998   | 10.946  | 5568             | 0.973           |
| Experiment 4       | 6937  | 0.998   | 11.040  | 6173             | 0.969           |
| Experiment 5       | 6948  | 0.998   | 11.213  | 6428             | 0.972           |
| Experiment 6       | 7052  | 0.998   | 11.154  | 6401             | 0.970           |
