# Supplementary material for: Saline-Alkali Soil Property Improved by the Synergistic Effects of Priestia aryabhattai JL-5, Staphylococcus pseudoxylosus XW-4, Leymus chinensis and Soil Microbiota
Source: MDPI journal article supplement (doi:10.3390/ijms24097737), 2023-04-23
Supplement: s1 [file s1]

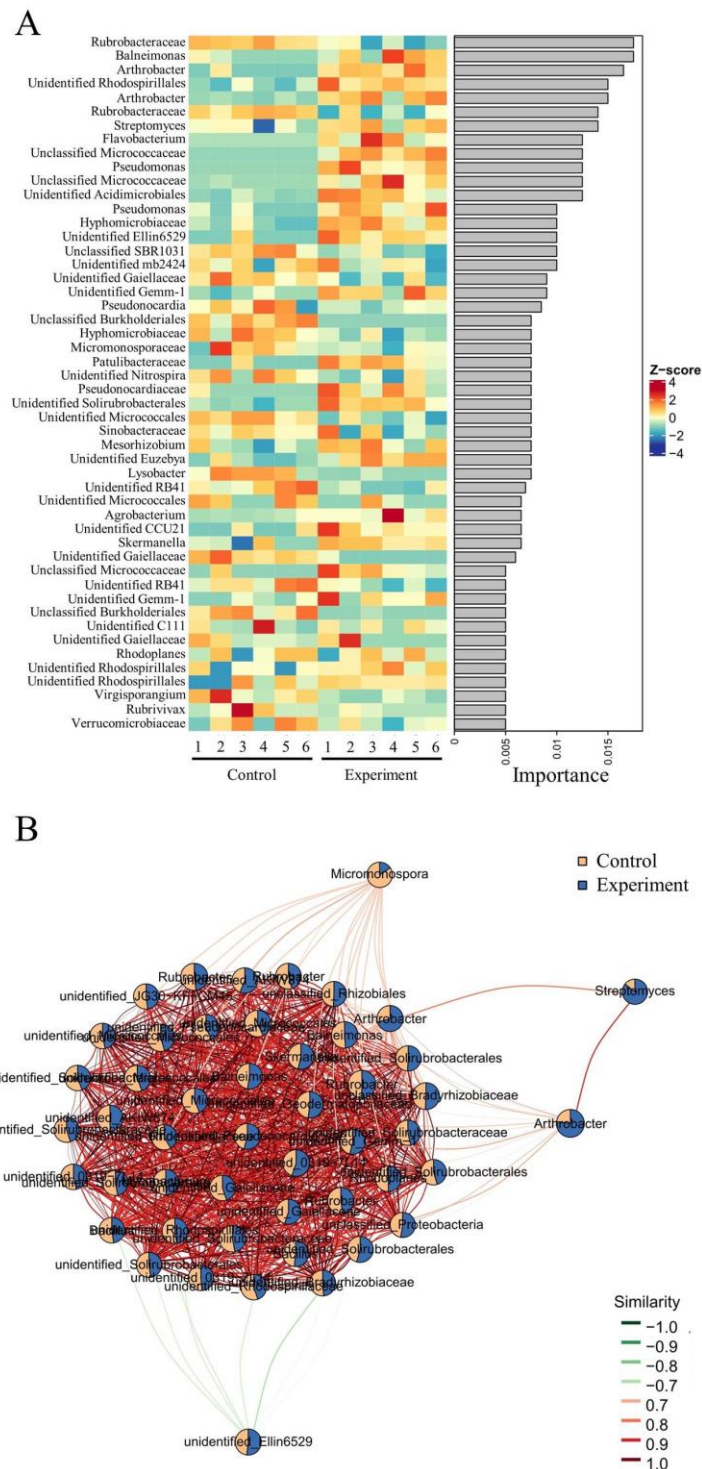

**Figure S3.** Effects of combined bacterial solutions of both *Priestia aryabhattai* JL-5 and *Staphylococcus pseudoxylus* XW-4 on the relationships among soil microorganisms. **(A)** Heatmap of top 50 operational taxonomic units (OTUs) with the significant differences between the experimental and control groups. **(B)** Network of relatively dominant taxa with the taxonomic abundance indicated in the pie graphs.
