# Supplementary material for: Saline-Alkali Soil Property Improved by the Synergistic Effects of Priestia aryabhattai JL-5, Staphylococcus pseudoxylosus XW-4, Leymus chinensis and Soil Microbiota
Source: Int J Mol Sci. 2023 Apr 23;24(9):7737. doi: 10.3390/ijms24097737 (PMC10178608; doi:10.3390/ijms24097737)
Supplement: Supplementary file 1 [file ijms-24-07737-s001.zip]

Archive with 5 entries (5 files):
- Figure S1.pdf
- FIgure S2.pdf
- Figure S3.pdf
- Table S1.csv
- Table S2.pdf
