# Supplementary material for: Saline-Alkali Soil Property Improved by the Synergistic Effects of Priestia aryabhattai JL-5, Staphylococcus pseudoxylosus XW-4, Leymus chinensis and Soil Microbiota
Source: Int J Mol Sci. 2023 Apr 23;24(9):7737. doi: 10.3390/ijms24097737 (PMC10178608; doi:10.3390/ijms24097737)
Supplement: Supplementary file 1 [file ijms-24-07737-s001.zip › Table S1.csv]

Gene_id	Gene name	Gene description	FC(JL59/JL57)	Log2FC(JL59/JL57)	Pvalue	Padjust	Significant	Regulate	Gene Type	Biotype
FORC47_RS00770	rpsE	30S ribosomal protein S5	7.822	2.96750024	0	0	yes	up	ref_gene	mRNA
FORC47_RS19635	rpsO	30S ribosomal protein S15	2.328	1.218986271	0	0	yes	up	ref_gene	mRNA
FORC47_RS00780	rplO	50S ribosomal protein L15	7.751	2.954460341	0	0	yes	up	ref_gene	mRNA
FORC47_RS00785	secY	preprotein translocase subunit SecY	6.758	2.756701048	0	0	yes	up	ref_gene	mRNA
FORC47_RS00790	FORC47_RS00790	adenylate kinase	5.987	2.581736175	0	0	yes	up	ref_gene	mRNA
FORC47_RS00795	map	type I methionyl aminopeptidase	5.933	2.568710684	0	0	yes	up	ref_gene	mRNA
FORC47_RS19660	infB	translation initiation factor IF-2	3.605	1.849844399	0	0	yes	up	ref_gene	mRNA
FORC47_RS00820	rpoA	DNA-directed RNA polymerase subunit alpha	4.282	2.09825338	0	0	yes	up	ref_gene	mRNA
FORC47_RS21290	FORC47_RS21290	MarR family transcriptional regulator	2.338	1.225121539	0	0	yes	up	ref_gene	mRNA
FORC47_RS06795	FORC47_RS06795	formate/nitrite transporter family protein	3.263	1.705986197	0	0	yes	up	ref_gene	mRNA
FORC47_RS23980	rpsD	30S ribosomal protein S4	3.828	1.93658727	0	0	yes	up	ref_gene	mRNA
FORC47_RS00850	rplM	50S ribosomal protein L13	3.847	1.943910982	0	0	yes	up	ref_gene	mRNA
FORC47_RS11945	FORC47_RS11945	DUF3974 domain-containing protein	4.88	2.286738341	0	0	yes	up	ref_gene	mRNA
FORC47_RS09390	nheB	non-hemolytic enterotoxin NHE subunit B	4.65	2.217346055	0	0	yes	up	ref_gene	mRNA
FORC47_RS19725	tsf	translation elongation factor Ts	3.873	1.953629002	0	0	yes	up	ref_gene	mRNA
FORC47_RS19730	rpsB	30S ribosomal protein S2	3.512	1.81226592	0	0	yes	up	ref_gene	mRNA
FORC47_RS11940	FORC47_RS11940	toxic anion resistance protein	2.567	1.360117648	0	0	yes	up	ref_gene	mRNA
FORC47_RS00760	rplF	50S ribosomal protein L6	7.617	2.929226234	0	0	yes	up	ref_gene	mRNA
FORC47_RS00755	rpsH	30S ribosomal protein S8	10.151	3.34354186	0	0	yes	up	ref_gene	mRNA
FORC47_RS00745	rplE	50S ribosomal protein L5	10.421	3.381455294	0	0	yes	up	ref_gene	mRNA
FORC47_RS00640	rpoB	DNA-directed RNA polymerase subunit beta	3.731	1.899753517	0	0	yes	up	ref_gene	mRNA
FORC47_RS00645	rpoC	DNA-directed RNA polymerase subunit beta'	2.25	1.170145127	0	0	yes	up	ref_gene	mRNA
FORC47_RS00655	rpsL	30S ribosomal protein S12	7.289	2.865783406	0	0	yes	up	ref_gene	mRNA
FORC47_RS00660	rpsG	30S ribosomal protein S7	6.883	2.783034921	0	0	yes	up	ref_gene	mRNA
FORC47_RS00680	rpsJ	30S ribosomal protein S10	7.833	2.969553811	0	0	yes	up	ref_gene	mRNA
FORC47_RS00685	rplC	50S ribosomal protein L3	7.412	2.8898282	0	0	yes	up	ref_gene	mRNA
FORC47_RS00690	rplD	50S ribosomal protein L4	7.259	2.859775008	0	0	yes	up	ref_gene	mRNA
FORC47_RS00695	rplW	50S ribosomal protein L23	9.238	3.207516259	0	0	yes	up	ref_gene	mRNA
FORC47_RS00700	rplB	50S ribosomal protein L2	9.095	3.18509802	0	0	yes	up	ref_gene	mRNA
FORC47_RS00705	rpsS	30S ribosomal protein S19	10.865	3.441569057	0	0	yes	up	ref_gene	mRNA
FORC47_RS00710	rplV	50S ribosomal protein L22	11.933	3.576914931	0	0	yes	up	ref_gene	mRNA
FORC47_RS00715	rpsC	30S ribosomal protein S3	9.36	3.226510521	0	0	yes	up	ref_gene	mRNA
FORC47_RS00720	rplP	50S ribosomal protein L16	10.471	3.388268038	0	0	yes	up	ref_gene	mRNA
FORC47_RS00730	rpsQ	30S ribosomal protein S17	9.835	3.297926309	0	0	yes	up	ref_gene	mRNA
FORC47_RS00735	rplN	50S ribosomal protein L14	9.831	3.297373149	0	0	yes	up	ref_gene	mRNA
FORC47_RS00740	rplX	50S ribosomal protein L24	11.272	3.494663957	0	0	yes	up	ref_gene	mRNA
FORC47_RS00750	rpsN	30S ribosomal protein S14	13.557	3.760958635	0	0	yes	up	ref_gene	mRNA
FORC47_RS09385	nheA	non-hemolytic enterotoxin NHE subunit A	3.812	1.930508092	0	0	yes	up	ref_gene	mRNA
FORC47_RS22250	FORC47_RS22250	GatB/YqeY domain-containing protein	2.599	1.378131598	0	0	yes	up	ref_gene	mRNA
FORC47_RS01160	FORC47_RS01160	DUF3948 family protein	8.082	3.014707486	0	0	yes	up	ref_gene	mRNA
FORC47_RS22070	FORC47_RS22070	penicillin-binding protein 2	3.474	1.796792231	0	0	yes	up	ref_gene	mRNA
FORC47_RS01715	purE	5-(carboxyamino)imidazole ribonucleotide mutase	4.53	2.179505434	0	0	yes	up	ref_gene	mRNA
FORC47_RS21950	FORC47_RS21950	hypothetical protein	2.739	1.45373516	0	0	yes	up	ref_gene	mRNA
FORC47_RS22255	rpsU	30S ribosomal protein S21	2.954	1.562554105	0	0	yes	up	ref_gene	mRNA
FORC47_RS07460	FORC47_RS07460	response regulator transcription factor	52.757	5.721280912	0	0	yes	up	ref_gene	mRNA
FORC47_RS07455	FORC47_RS07455	sensor histidine kinase	68.456	6.097114867	0	0	yes	up	ref_gene	mRNA
FORC47_RS23545	infC	translation initiation factor IF-3	3.788	1.92135795	0	0	yes	up	ref_gene	mRNA
FORC47_RS23540	rpmI	50S ribosomal protein L35	5.864	2.551985921	0	0	yes	up	ref_gene	mRNA
FORC47_RS21450	FORC47_RS21450	YjdF family protein	2.101	1.071103879	0	0	yes	up	ref_gene	mRNA
FORC47_RS23290	FORC47_RS23290	TetR family transcriptional regulator	2.065	1.045817113	0	0	yes	up	ref_gene	mRNA
FORC47_RS19795	rplS	50S ribosomal protein L19	4.199	2.070081843	0	0	yes	up	ref_gene	mRNA
FORC47_RS07440	FORC47_RS07440	flagellar basal body rod protein	236.775	7.88737032	0	0	yes	up	ref_gene	mRNA
FORC47_RS22960	mreC	rod shape-determining protein MreC	8.671	3.116258188	0	0	yes	up	ref_gene	mRNA
FORC47_RS22925	rplU	50S ribosomal protein L21	2.839	1.505556891	0	0	yes	up	ref_gene	mRNA
FORC47_RS22920	FORC47_RS22920	ribosomal-processing cysteine protease Prp	2.547	1.348749527	0	0	yes	up	ref_gene	mRNA
FORC47_RS22915	rpmA	50S ribosomal protein L27	2.511	1.328187698	0	0	yes	up	ref_gene	mRNA
FORC47_RS07445	FORC47_RS07445	PspA/IM30 family protein	258.428	8.013618862	0	0	yes	up	ref_gene	mRNA
FORC47_RS11780	cspD	cold-shock protein CspD	5.456	2.447772076	0	0	yes	up	ref_gene	mRNA
FORC47_RS07450	liaF	cell wall-active antibiotics response protein LiaF	61.485	5.942164341	0	0	yes	up	ref_gene	mRNA
FORC47_RS23070	tig	trigger factor	4.82	2.269157903	0	0	yes	up	ref_gene	mRNA
FORC47_RS24445	FORC47_RS24445	cation:proton antiporter	4.944	2.305721816	0	0	yes	up	ref_gene	mRNA
FORC47_RS00665	fusA	elongation factor G	4.768	2.253321862	0	0	yes	up	ref_gene	mRNA
FORC47_RS18160	cspB	cold shock-like protein CspB	2.303	1.20348527	0	0	yes	up	ref_gene	mRNA
FORC47_RS09970	FORC47_RS09970	peptidase	15.465	3.950909858	0	0	yes	up	ref_gene	mRNA
FORC47_RS27000	FORC47_RS27000	cell wall-binding protein EntA	8.481	3.084271444	0	0	yes	up	ref_gene	mRNA
FORC47_RS04260	FORC47_RS04260	efflux RND transporter periplasmic adaptor subunit	18.524	4.211285572	0	0	yes	up	ref_gene	mRNA
FORC47_RS09780	entFM	enterotoxin EntFM	3.835	1.939195874	0	0	yes	up	ref_gene	mRNA
FORC47_RS00275	purR	pur operon repressor	3.93	1.974432727	0	0	yes	up	ref_gene	mRNA
FORC47_RS26730	FORC47_RS26730	C40 family peptidase	2.237	1.161462314	0	0	yes	up	ref_gene	mRNA
FORC47_RS26675	ftsX	permease-like cell division protein FtsX	5.076	2.343752056	0	0	yes	up	ref_gene	mRNA
FORC47_RS05250	FORC47_RS05250	heavy metal-binding domain-containing protein	6.144	2.619207878	0	0	yes	up	ref_gene	mRNA
FORC47_RS18810	FORC47_RS18810	hypothetical protein	2.748	1.458175271	0	0	yes	up	ref_gene	mRNA
FORC47_RS05385	glpD	aerobic glycerol-3-phosphate dehydrogenase	4.142	2.050391722	0	0	yes	up	ref_gene	mRNA
FORC47_RS18105	FORC47_RS18105	hypothetical protein	3.362	1.749342819	0	0	yes	up	ref_gene	mRNA
FORC47_RS04255	FORC47_RS04255	ABC transporter ATP-binding protein	38.618	5.271209134	0	0	yes	up	ref_gene	mRNA
FORC47_RS18895	FORC47_RS18895	ABC transporter permease subunit	11.878	3.570232757	0	0	yes	up	ref_gene	mRNA
FORC47_RS04245	entC	cell wall-binding protein EntC	4.594	2.19967337	0	0	yes	up	ref_gene	mRNA
FORC47_RS28275	rpsF	30S ribosomal protein S6	3.277	1.71227031	0	0	yes	up	ref_gene	mRNA
FORC47_RS28270	ssb	single-stranded DNA-binding protein	3.233	1.692901278	0	0	yes	up	ref_gene	mRNA
FORC47_RS04250	FORC47_RS04250	ABC transporter permease	40.937	5.355332474	0	0	yes	up	ref_gene	mRNA
FORC47_RS28240	FORC47_RS28240	adenylosuccinate synthase	4.378	2.13022356	0	0	yes	up	ref_gene	mRNA
FORC47_RS28160	guaC	GMP reductase	15.401	3.944993369	0	0	yes	up	ref_gene	mRNA
FORC47_RS25105	cspD	cold-shock protein CspD	3.567	1.834629057	0	0	yes	up	ref_gene	mRNA
FORC47_RS19435	mutL	DNA mismatch repair endonuclease MutL	2.831	1.501360315	0	0	yes	up	ref_gene	mRNA
FORC47_RS14150	FORC47_RS14150	class I SAM-dependent methyltransferase	6.793	2.76399108	0	0	yes	up	ref_gene	mRNA
FORC47_RS19155	entD	cell wall-binding protein EntD	4.449	2.153463366	0	0	yes	up	ref_gene	mRNA
FORC47_RS24935	FORC47_RS24935	ABC transporter permease	15.736	3.976008058	0	0	yes	up	ref_gene	mRNA
FORC47_RS19100	glnR	transcriptional repressor GlnR	8.372	3.065527386	0	0	yes	up	ref_gene	mRNA
FORC47_RS24845	FORC47_RS24845	hypothetical protein	42.919	5.423551889	0	0	yes	up	ref_gene	mRNA
FORC47_RS13955	FORC47_RS13955	M4 family metallopeptidase	2.448	1.291849027	0	0	yes	up	ref_gene	mRNA
FORC47_RS19485	rny	ribonuclease Y	2.409	1.268304541	0	0	yes	up	ref_gene	mRNA
FORC47_RS19440	mutS	DNA mismatch repair protein MutS	3.502	1.80803317	0	0	yes	up	ref_gene	mRNA
FORC47_RS19095	glnA	type I glutamate--ammonia ligase	6.605	2.723504489	0	0	yes	up	ref_gene	mRNA
FORC47_RS26230	FORC47_RS26230	NAD(P)/FAD-dependent oxidoreductase	2.359	1.238341872	0	0	yes	up	ref_gene	mRNA
FORC47_RS00615	rplK	50S ribosomal protein L11	3.402	1.766414279	0	0	yes	up	ref_gene	mRNA
FORC47_RS02120	FORC47_RS02120	acyl-CoA desaturase	3.318	1.730158944	0	0	yes	up	ref_gene	mRNA
FORC47_RS19585	FORC47_RS19585	ribonuclease J	2.308	1.206851995	0	0	yes	up	ref_gene	mRNA
FORC47_RS18905	FORC47_RS18905	ABC transporter permease	109.784	6.77852854	0	0	yes	up	ref_gene	mRNA
FORC47_RS00030	gyrA	DNA gyrase subunit A	3.523	1.816845128	5.06E-303	1.80E-301	yes	up	ref_gene	mRNA
FORC47_RS00725	rpmC	50S ribosomal protein L29	12.463	3.639601571	2.00E-301	7.07E-300	yes	up	ref_gene	mRNA
FORC47_RS23945	ezrA	septation ring formation regulator EzrA	2.882	1.526828032	2.89E-300	1.02E-298	yes	up	ref_gene	mRNA
FORC47_RS00025	gyrB	DNA topoisomerase (ATP-hydrolyzing) subunit B	4.395	2.135827653	5.66E-298	1.98E-296	yes	up	ref_gene	mRNA
FORC47_RS18095	FORC47_RS18095	VaFE repeat-containing surface-anchored protein	3.238	1.69523934	2.01E-297	7.00E-296	yes	up	ref_gene	mRNA
FORC47_RS26965	FORC47_RS26965	SH3 domain-containing protein	3.256	1.70297105	7.18E-296	2.46E-294	yes	up	ref_gene	mRNA
FORC47_RS27520	FORC47_RS27520	type B 50S ribosomal protein L31	2.128	1.089257706	1.72E-295	5.86E-294	yes	up	ref_gene	mRNA
FORC47_RS00625	rplJ	50S ribosomal protein L10	5.312	2.409272595	1.15E-293	3.91E-292	yes	up	ref_gene	mRNA
FORC47_RS19820	ffh	signal recognition particle protein	2.343	1.228191467	7.07E-292	2.38E-290	yes	up	ref_gene	mRNA
FORC47_RS07570	FORC47_RS07570	tyrosine-type recombinase/integrase	4.759	2.25055928	1.64E-280	5.37E-279	yes	up	ref_gene	mRNA
FORC47_RS14805	FORC47_RS14805	LL-diaminopimelate aminotransferase	4.707	2.234705329	1.07E-270	3.45E-269	yes	up	ref_gene	mRNA
FORC47_RS20235	FORC47_RS20235	nucleotidyltransferase	2.337	1.224515876	9.59E-270	3.07E-268	yes	up	ref_gene	mRNA
FORC47_RS05685	FORC47_RS05685	fatty acid--CoA ligase family protein	2.005	1.003531551	1.12E-266	3.53E-265	yes	up	ref_gene	mRNA
FORC47_RS01240	FORC47_RS01240	transglycosylase SLT domain-containing protein	10.347	3.371084142	3.23E-260	9.99E-259	yes	up	ref_gene	mRNA
FORC47_RS01365	FORC47_RS01365	DEAD/DEAH box helicase	4.392	2.134918148	2.11E-239	6.41E-238	yes	up	ref_gene	mRNA
FORC47_RS22745	relA	GTP diphosphokinase	3.038	1.603091051	1.11E-234	3.31E-233	yes	up	ref_gene	mRNA
FORC47_RS20095	FORC47_RS20095	RNA-binding protein	2.438	1.285550724	2.52E-232	7.45E-231	yes	up	ref_gene	mRNA
FORC47_RS00810	rpsM	30S ribosomal protein S13	4.385	2.132635707	1.63E-229	4.80E-228	yes	up	ref_gene	mRNA
FORC47_RS03925	FORC47_RS03925	SH3 domain-containing protein	2.486	1.31396845	1.01E-222	2.95E-221	yes	up	ref_gene	mRNA
FORC47_RS25955	FORC47_RS25955	amino acid permease	12.737	3.670990038	1.49E-219	4.32E-218	yes	up	ref_gene	mRNA
FORC47_RS05820	cspA	RNA chaperone/antiterminator CspA	3.534	1.821408133	7.00E-218	2.01E-216	yes	up	ref_gene	mRNA
FORC47_RS20105	FORC47_RS20105	cell division protein SepF	2.922	1.547018658	3.13E-217	8.98E-216	yes	up	ref_gene	mRNA
FORC47_RS19665	FORC47_RS19665	YlxQ family RNA-binding protein	5.753	2.524355814	3.46E-217	9.85E-216	yes	up	ref_gene	mRNA
FORC47_RS20580	fadH	2%2C4-dienoyl-CoA reductase	2.341	1.227196358	1.03E-216	2.91E-215	yes	up	ref_gene	mRNA
FORC47_RS00765	rplR	50S ribosomal protein L18	6.913	2.789251017	4.79E-213	1.34E-211	yes	up	ref_gene	mRNA
FORC47_RS13720	FORC47_RS13720	OFA family MFS transporter	84.599	6.402562374	8.64E-213	2.42E-211	yes	up	ref_gene	mRNA
FORC47_RS26680	ftsE	cell division ATP-binding protein FtsE	4.442	2.151185625	3.47E-212	9.65E-211	yes	up	ref_gene	mRNA
FORC47_RS23535	rplT	50S ribosomal protein L20	4.407	2.139931462	1.26E-211	3.48E-210	yes	up	ref_gene	mRNA
FORC47_RS02850	FORC47_RS02850	transglycosylase domain-containing protein	4.142	2.050196545	2.90E-210	8.00E-209	yes	up	ref_gene	mRNA
FORC47_RS20480	pdhA	pyruvate dehydrogenase E1 component subunit alpha	3.162	1.660959748	3.18E-209	8.73E-208	yes	up	ref_gene	mRNA
FORC47_RS16800	FORC47_RS16800	hypothetical protein	5.694	2.509400673	1.12E-206	3.04E-205	yes	up	ref_gene	mRNA
FORC47_RS10715	FORC47_RS10715	Bax inhibitor-1/YccA family protein	2.053	1.037784383	9.53E-206	2.58E-204	yes	up	ref_gene	mRNA
FORC47_RS19955	gmk	guanylate kinase	5.547	2.471692915	1.18E-201	3.15E-200	yes	up	ref_gene	mRNA
FORC47_RS09990	FORC47_RS09990	ABC transporter permease	15.416	3.946367549	6.62E-201	1.76E-199	yes	up	ref_gene	mRNA
FORC47_RS24455	FORC47_RS24455	tyrosine-type recombinase/integrase	6.192	2.63051432	2.69E-196	7.03E-195	yes	up	ref_gene	mRNA
FORC47_RS22035	rpmG	50S ribosomal protein L33	5.459	2.448638244	1.08E-190	2.75E-189	yes	up	ref_gene	mRNA
FORC47_RS08025	FORC47_RS08025	PBP1A family penicillin-binding protein	3.444	1.783898658	1.65E-190	4.21E-189	yes	up	ref_gene	mRNA
FORC47_RS19675	nusA	transcription termination factor NusA	4.705	2.234343694	4.73E-188	1.20E-186	yes	up	ref_gene	mRNA
FORC47_RS27290	murA	UDP-N-acetylglucosamine 1-carboxyvinyltransferase	3.089	1.627056318	2.03E-187	5.12E-186	yes	up	ref_gene	mRNA
FORC47_RS18335	fdhF	formate dehydrogenase subunit alpha	5.717	2.515191229	6.61E-182	1.65E-180	yes	up	ref_gene	mRNA
FORC47_RS00620	rplA	50S ribosomal protein L1	3.895	1.961589965	4.17E-181	1.04E-179	yes	up	ref_gene	mRNA
FORC47_RS17080	FORC47_RS17080	hemolysin family protein	2.731	1.449271905	4.39E-181	1.08E-179	yes	up	ref_gene	mRNA
FORC47_RS28065	FORC47_RS28065	efflux RND transporter permease subunit	10.163	3.34524972	2.88E-174	6.88E-173	yes	up	ref_gene	mRNA
FORC47_RS13030	FORC47_RS13030	DUF3937 family protein	2.48	1.310339074	4.93E-172	1.16E-170	yes	up	ref_gene	mRNA
FORC47_RS15800	lepB	signal peptidase I	3.594	1.845512284	1.10E-171	2.58E-170	yes	up	ref_gene	mRNA
FORC47_RS05970	FORC47_RS05970	S1-like domain-containing RNA-binding protein	9.375	3.228817501	9.67E-171	2.25E-169	yes	up	ref_gene	mRNA
FORC47_RS03555	cerA	phospholipase CerA	5.984	2.58100077	7.90E-167	1.83E-165	yes	up	ref_gene	mRNA
FORC47_RS19720	pyrH	UMP kinase	3.32	1.731039964	1.83E-165	4.21E-164	yes	up	ref_gene	mRNA
FORC47_RS26350	FORC47_RS26350	siderophore ABC transporter substrate-binding protein	3.127	1.644693013	2.14E-165	4.91E-164	yes	up	ref_gene	mRNA
FORC47_RS08360	FORC47_RS08360	MATE family efflux transporter	5.489	2.456442614	2.13E-164	4.87E-163	yes	up	ref_gene	mRNA
FORC47_RS21570	dxs	1-deoxy-D-xylulose-5-phosphate synthase	2.463	1.300612147	2.01E-163	4.58E-162	yes	up	ref_gene	mRNA
FORC47_RS00370	tilS	tRNA lysidine(34) synthetase TilS	2.075	1.053433617	5.14E-163	1.16E-161	yes	up	ref_gene	mRNA
FORC47_RS28265	rpsR	30S ribosomal protein S18	3.077	1.621602169	9.53E-161	2.14E-159	yes	up	ref_gene	mRNA
FORC47_RS00855	rpsI	30S ribosomal protein S9	3.463	1.791896648	3.06E-160	6.86E-159	yes	up	ref_gene	mRNA
FORC47_RS15040	FORC47_RS15040	LTA synthase family protein	2.846	1.509067371	5.02E-159	1.12E-157	yes	up	ref_gene	mRNA
FORC47_RS25755	lipA	lipoyl synthase	2.069	1.048992453	6.07E-156	1.34E-154	yes	up	ref_gene	mRNA
FORC47_RS19965	FORC47_RS19965	YicC family protein	3.722	1.896133275	2.90E-153	6.34E-152	yes	up	ref_gene	mRNA
FORC47_RS24165	murC	UDP-N-acetylmuramate--L-alanine ligase	2.267	1.18085483	7.34E-152	1.60E-150	yes	up	ref_gene	mRNA
FORC47_RS18900	FORC47_RS18900	ABC transporter ATP-binding protein	9.165	3.196111496	3.44E-148	7.30E-147	yes	up	ref_gene	mRNA
FORC47_RS00020	recF	DNA replication/repair protein RecF	3.763	1.911710801	6.06E-148	1.28E-146	yes	up	ref_gene	mRNA
FORC47_RS22765	secDF	protein translocase subunit SecDF	3.076	1.621275728	1.32E-146	2.79E-145	yes	up	ref_gene	mRNA
FORC47_RS20115	pgeF	peptidoglycan editing factor PgeF	2.061	1.043149103	5.53E-146	1.16E-144	yes	up	ref_gene	mRNA
FORC47_RS27410	atpB	F0F1 ATP synthase subunit A	2.209	1.143686449	8.09E-146	1.69E-144	yes	up	ref_gene	mRNA
FORC47_RS09865	FORC47_RS09865	LCP family protein	6.291	2.653370477	7.93E-144	1.65E-142	yes	up	ref_gene	mRNA
FORC47_RS00775	rpmD	50S ribosomal protein L30	7.385	2.884634094	2.20E-143	4.57E-142	yes	up	ref_gene	mRNA
FORC47_RS00440	lysS	lysine--tRNA ligase	2.585	1.370212173	3.52E-143	7.25E-142	yes	up	ref_gene	mRNA
FORC47_RS06675	inhA1	M6 family metalloprotease immune inhibitor InhA1	6.331	2.662490869	1.55E-142	3.17E-141	yes	up	ref_gene	mRNA
FORC47_RS24450	FORC47_RS24450	cation:proton antiporter regulatory subunit	5.083	2.345606489	8.01E-139	1.62E-137	yes	up	ref_gene	mRNA
FORC47_RS02385	FORC47_RS02385	low molecular weight phosphotyrosine protein phosphatase	3.536	1.822006087	7.38E-137	1.48E-135	yes	up	ref_gene	mRNA
FORC47_RS27405	atpE	F0F1 ATP synthase subunit C	2.331	1.221064391	1.04E-136	2.07E-135	yes	up	ref_gene	mRNA
FORC47_RS07465	FORC47_RS07465	DUF3922 domain-containing protein	2.454	1.295380801	1.21E-135	2.41E-134	yes	up	ref_gene	mRNA
FORC47_RS00075	pdxS	pyridoxal 5'-phosphate synthase lyase subunit PdxS	2.246	1.16750076	4.86E-135	9.65E-134	yes	up	ref_gene	mRNA
FORC47_RS12035	FORC47_RS12035	hypothetical protein	4.18	2.063531851	1.95E-133	3.84E-132	yes	up	ref_gene	mRNA
FORC47_RS19680	rimP	ribosome maturation factor RimP	4.23	2.080634279	3.00E-133	5.86E-132	yes	up	ref_gene	mRNA
FORC47_RS07425	gltP	glutamate/aspartate:proton symporter GltP	2.84	1.505640949	1.59E-131	3.09E-130	yes	up	ref_gene	mRNA
FORC47_RS26225	FORC47_RS26225	DUF1641 domain-containing protein	2.108	1.075868186	1.59E-131	3.08E-130	yes	up	ref_gene	mRNA
FORC47_RS19570	FORC47_RS19570	DNA translocase FtsK	2.174	1.120646754	6.91E-131	1.32E-129	yes	up	ref_gene	mRNA
FORC47_RS24550	metK	methionine adenosyltransferase	2.674	1.418999263	1.50E-130	2.86E-129	yes	up	ref_gene	mRNA
FORC47_RS20170	murD	UDP-N-acetylmuramoyl-L-alanine--D-glutamate ligase	4.894	2.290994144	6.74E-129	1.27E-127	yes	up	ref_gene	mRNA
FORC47_RS26950	FORC47_RS26950	LTA synthase family protein	2.574	1.364116446	8.08E-128	1.52E-126	yes	up	ref_gene	mRNA
FORC47_RS24465	FORC47_RS24465	ABC transporter ATP-binding protein	11.878	3.570195563	4.80E-127	8.93E-126	yes	up	ref_gene	mRNA
FORC47_RS00610	nusG	transcription termination/antitermination protein NusG	3.129	1.645775338	6.02E-127	1.12E-125	yes	up	ref_gene	mRNA
FORC47_RS19540	FORC47_RS19540	ABC transporter permease	3.122	1.642513166	3.95E-124	7.25E-123	yes	up	ref_gene	mRNA
FORC47_RS14510	FORC47_RS14510	YxcD family protein	3.035	1.60183619	6.82E-123	1.24E-121	yes	up	ref_gene	mRNA
FORC47_RS00005	dnaA	chromosomal replication initiator protein DnaA	4.383	2.132062517	5.62E-122	1.02E-120	yes	up	ref_gene	mRNA
FORC47_RS08005	aspB	aspartate transaminase AspB	2.151	1.105143973	6.25E-119	1.13E-117	yes	up	ref_gene	mRNA
FORC47_RS30515	FORC47_RS30515	DUF3948 family protein	10.68	3.416791758	1.31E-118	2.36E-117	yes	up	ref_gene	mRNA
FORC47_RS22135	FORC47_RS22135	DEAD/DEAH box helicase	5.802	2.53651683	1.38E-118	2.47E-117	yes	up	ref_gene	mRNA
FORC47_RS19815	rpsP	30S ribosomal protein S16	2.865	1.518343604	7.80E-118	1.39E-116	yes	up	ref_gene	mRNA
FORC47_RS23080	FORC47_RS23080	hypothetical protein	16.856	4.075159149	2.30E-116	4.07E-115	yes	up	ref_gene	mRNA
FORC47_RS13835	FORC47_RS13835	nucleotide excision repair endonuclease	5.185	2.374257004	3.53E-116	6.23E-115	yes	up	ref_gene	mRNA
FORC47_RS20110	FORC47_RS20110	YggS family pyridoxal phosphate-dependent enzyme	2.576	1.364984916	2.48E-114	4.34E-113	yes	up	ref_gene	mRNA
FORC47_RS04580	FORC47_RS04580	YlbF/YmcA family competence regulator	2.399	1.262206264	9.29E-114	1.62E-112	yes	up	ref_gene	mRNA
FORC47_RS10555	FORC47_RS10555	oxalate:formate antiporter	2.247	1.16786027	1.01E-113	1.75E-112	yes	up	ref_gene	mRNA
FORC47_RS07420	FORC47_RS07420	M23 family metallopeptidase	6.226	2.63841195	2.29E-112	3.97E-111	yes	up	ref_gene	mRNA
FORC47_RS08375	FORC47_RS08375	DUF4870 domain-containing protein	12.666	3.662922645	3.20E-111	5.49E-110	yes	up	ref_gene	mRNA
FORC47_RS22965	mreB	cell shape-determining protein MreB	4.986	2.31791769	3.71E-111	6.35E-110	yes	up	ref_gene	mRNA
FORC47_RS05605	FORC47_RS05605	DUF6359 domain-containing protein	5.05	2.33639545	1.69E-110	2.88E-109	yes	up	ref_gene	mRNA
FORC47_RS22905	obgE	GTPase ObgE	3.947	1.980815474	3.58E-110	6.07E-109	yes	up	ref_gene	mRNA
FORC47_RS15820	FORC47_RS15820	acyl-CoA/acyl-ACP dehydrogenase	3.648	1.867099134	1.26E-109	2.13E-108	yes	up	ref_gene	mRNA
FORC47_RS06825	phaQ	poly-beta-hydroxybutyrate-responsive repressor	2.05	1.035768701	1.46E-106	2.44E-105	yes	up	ref_gene	mRNA
FORC47_RS20230	FORC47_RS20230	DUF177 domain-containing protein	3.429	1.777591901	2.18E-106	3.64E-105	yes	up	ref_gene	mRNA
FORC47_RS20395	typA	translational GTPase TypA	2.218	1.149132787	9.15E-104	1.51E-102	yes	up	ref_gene	mRNA
FORC47_RS00825	rplQ	50S ribosomal protein L17	3.405	1.767539568	2.20E-103	3.61E-102	yes	up	ref_gene	mRNA
FORC47_RS14515	FORC47_RS14515	hypothetical protein	2.426	1.278810463	3.95E-103	6.47E-102	yes	up	ref_gene	mRNA
FORC47_RS22435	FORC47_RS22435	GTP pyrophosphokinase family protein	2.231	1.157634303	3.20E-102	5.19E-101	yes	up	ref_gene	mRNA
FORC47_RS18065	FORC47_RS18065	Lsa family ABC-F type ribosomal protection protein	2.121	1.085064581	3.35E-101	5.42E-100	yes	up	ref_gene	mRNA
FORC47_RS19685	FORC47_RS19685	PolC-type DNA polymerase III	2.857	1.51454943	3.93E-101	6.34E-100	yes	up	ref_gene	mRNA
FORC47_RS26335	FORC47_RS26335	ATP-binding cassette domain-containing protein	4.394	2.135482756	3.59E-99	5.74E-98	yes	up	ref_gene	mRNA
FORC47_RS22750	FORC47_RS22750	adenine phosphoribosyltransferase	4.225	2.078947902	1.25E-98	1.99E-97	yes	up	ref_gene	mRNA
FORC47_RS28255	FORC47_RS28255	DHH family phosphoesterase	2.033	1.023308933	1.76E-96	2.79E-95	yes	up	ref_gene	mRNA
FORC47_RS26990	opuD	glycine betaine transporter OpuD	7.173	2.842585959	2.73E-93	4.27E-92	yes	up	ref_gene	mRNA
FORC47_RS00815	rpsK	30S ribosomal protein S11	3.962	1.986241908	8.44E-92	1.31E-90	yes	up	ref_gene	mRNA
FORC47_RS19825	FORC47_RS19825	putative DNA-binding protein	3.707	1.890430998	1.76E-90	2.69E-89	yes	up	ref_gene	mRNA
FORC47_RS22595	FORC47_RS22595	YrrS family protein	2.889	1.530467504	5.43E-88	8.23E-87	yes	up	ref_gene	mRNA
FORC47_RS27990	FORC47_RS27990	O-antigen ligase family protein	7.304	2.868623876	9.16E-87	1.38E-85	yes	up	ref_gene	mRNA
FORC47_RS09395	FORC47_RS09395	alpha-helical pore-forming toxin family protein	4.186	2.065447875	1.02E-86	1.53E-85	yes	up	ref_gene	mRNA
FORC47_RS24460	FORC47_RS24460	ABC transporter permease	9.258	3.210694819	1.76E-86	2.64E-85	yes	up	ref_gene	mRNA
FORC47_RS24940	FORC47_RS24940	ABC transporter ATP-binding protein	8.496	3.086734478	2.88E-85	4.30E-84	yes	up	ref_gene	mRNA
FORC47_RS22695	FORC47_RS22695	cysteine desulfurase	2.452	1.294081266	3.64E-85	5.44E-84	yes	up	ref_gene	mRNA
FORC47_RS15025	FORC47_RS15025	polysaccharide deacetylase	2.834	1.502816968	1.07E-84	1.59E-83	yes	up	ref_gene	mRNA
FORC47_RS22325	rpsT	30S ribosomal protein S20	2.941	1.556492717	3.86E-84	5.71E-83	yes	up	ref_gene	mRNA
FORC47_RS19620	FORC47_RS19620	insulinase family protein	2.072	1.051197827	4.66E-84	6.89E-83	yes	up	ref_gene	mRNA
FORC47_RS03130	cadA	cadmium-translocating P-type ATPase	3.337	1.73859861	4.26E-83	6.24E-82	yes	up	ref_gene	mRNA
FORC47_RS07110	dltA	D-alanine--poly(phosphoribitol) ligase subunit DltA	2.284	1.191702139	9.77E-82	1.42E-80	yes	up	ref_gene	mRNA
FORC47_RS19550	FORC47_RS19550	ABC transporter ATP-binding protein	2.132	1.091936928	9.79E-81	1.42E-79	yes	up	ref_gene	mRNA
FORC47_RS00010	dnaN	DNA polymerase III subunit beta	3.78	1.918203814	1.62E-80	2.34E-79	yes	up	ref_gene	mRNA
FORC47_RS20175	mraY	phospho-N-acetylmuramoyl-pentapeptide-transferase	5.559	2.474913218	4.69E-79	6.68E-78	yes	up	ref_gene	mRNA
FORC47_RS07785	engA	ribosome-associated GTPase EngA	3.317	1.729877531	5.44E-79	7.73E-78	yes	up	ref_gene	mRNA
FORC47_RS18465	parC	DNA topoisomerase IV subunit A	3.489	1.802923296	3.30E-78	4.67E-77	yes	up	ref_gene	mRNA
FORC47_RS21130	FORC47_RS21130	NUDIX hydrolase	2.174	1.120259154	5.64E-78	7.96E-77	yes	up	ref_gene	mRNA
FORC47_RS20195	ftsL	cell division protein FtsL	2.055	1.038880127	8.72E-78	1.23E-76	yes	up	ref_gene	mRNA
FORC47_RS00290	glmU	bifunctional UDP-N-acetylglucosamine diphosphorylase/glucosamine-1-phosphate N-acetyltransferase GlmU	2.216	1.147922408	3.70E-77	5.20E-76	yes	up	ref_gene	mRNA
FORC47_RS10930	pbpC	penicillin-binding protein 3	2.54	1.345076879	5.03E-77	7.03E-76	yes	up	ref_gene	mRNA
FORC47_RS19225	FORC47_RS19225	HU family DNA-binding protein	3.121	1.641828613	4.86E-76	6.75E-75	yes	up	ref_gene	mRNA
FORC47_RS05535	FORC47_RS05535	SpaA isopeptide-forming pilin-related protein	5.462	2.449416187	2.21E-75	3.05E-74	yes	up	ref_gene	mRNA
FORC47_RS08085	FORC47_RS08085	class I SAM-dependent RNA methyltransferase	3.998	1.999363542	2.73E-74	3.74E-73	yes	up	ref_gene	mRNA
FORC47_RS20150	divIB	cell division protein DivIB	3.553	1.829095512	4.28E-74	5.82E-73	yes	up	ref_gene	mRNA
FORC47_RS14895	FORC47_RS14895	AI-2E family transporter	3.691	1.884020299	4.54E-74	6.16E-73	yes	up	ref_gene	mRNA
FORC47_RS23995	tyrS	tyrosine--tRNA ligase	5.912	2.563717165	1.87E-73	2.52E-72	yes	up	ref_gene	mRNA
FORC47_RS01115	FORC47_RS01115	peptide ABC transporter substrate-binding protein	8.356	3.062844965	2.90E-72	3.87E-71	yes	up	ref_gene	mRNA
FORC47_RS19715	frr	ribosome recycling factor	2.884	1.52795506	4.25E-72	5.65E-71	yes	up	ref_gene	mRNA
FORC47_RS05975	prsA	peptidylprolyl isomerase PrsA	4.458	2.15645006	2.44E-71	3.21E-70	yes	up	ref_gene	mRNA
FORC47_RS11775	FORC47_RS11775	cold-shock protein	2.609	1.383462274	2.88E-71	3.78E-70	yes	up	ref_gene	mRNA
FORC47_RS19885	rpmB	50S ribosomal protein L28	2.684	1.424267974	4.69E-71	6.14E-70	yes	up	ref_gene	mRNA
FORC47_RS26345	FORC47_RS26345	iron chelate uptake ABC transporter family permease subunit	3.165	1.662069406	3.69E-70	4.80E-69	yes	up	ref_gene	mRNA
FORC47_RS04185	FORC47_RS04185	LCP family protein	2.551	1.351032073	1.55E-69	2.00E-68	yes	up	ref_gene	mRNA
FORC47_RS13800	FORC47_RS13800	PH domain-containing protein	2.169	1.117185167	2.46E-69	3.17E-68	yes	up	ref_gene	mRNA
FORC47_RS20180	murE	UDP-N-acetylmuramoyl-L-alanyl-D-glutamate--2%2C6-diaminopimelate ligase	3.9	1.963418665	6.60E-69	8.50E-68	yes	up	ref_gene	mRNA
FORC47_RS08065	FORC47_RS08065	CotD family spore coat protein	16.179	4.016094026	6.51E-68	8.34E-67	yes	up	ref_gene	mRNA
FORC47_RS09160	hflX	GTPase HflX	2.384	1.253273665	2.04E-67	2.60E-66	yes	up	ref_gene	mRNA
FORC47_RS11605	FORC47_RS11605	ABC transporter permease	9.412	3.234439615	3.26E-67	4.16E-66	yes	up	ref_gene	mRNA
FORC47_RS26340	FORC47_RS26340	iron chelate uptake ABC transporter family permease subunit	3.641	1.864178239	1.14E-66	1.44E-65	yes	up	ref_gene	mRNA
FORC47_RS22690	mnmA	tRNA 2-thiouridine(34) synthase MnmA	2.032	1.022832486	1.27E-66	1.60E-65	yes	up	ref_gene	mRNA
FORC47_RS20190	FORC47_RS20190	penicillin-binding protein	2.005	1.003448464	5.96E-66	7.48E-65	yes	up	ref_gene	mRNA
FORC47_RS26115	FORC47_RS26115	cation:proton antiporter regulatory subunit	13.197	3.722180308	6.49E-66	8.12E-65	yes	up	ref_gene	mRNA
FORC47_RS25430	galU	UTP--glucose-1-phosphate uridylyltransferase GalU	2.163	1.112730002	9.96E-66	1.24E-64	yes	up	ref_gene	mRNA
FORC47_RS19790	lepB	signal peptidase I	5.243	2.39036192	3.93E-65	4.90E-64	yes	up	ref_gene	mRNA
FORC47_RS02920	colA	collagenase ColA	4.101	2.03608784	4.09E-65	5.08E-64	yes	up	ref_gene	mRNA
FORC47_RS20070	FORC47_RS20070	RluA family pseudouridine synthase	3.438	1.781599856	4.45E-65	5.52E-64	yes	up	ref_gene	mRNA
FORC47_RS01195	FORC47_RS01195	DUF3948 family protein	6.205	2.633526548	4.54E-65	5.62E-64	yes	up	ref_gene	mRNA
FORC47_RS20225	rpmF	50S ribosomal protein L32	2.362	1.239791701	9.41E-65	1.16E-63	yes	up	ref_gene	mRNA
FORC47_RS19785	ylqF	ribosome biogenesis GTPase YlqF	3.565	1.833868262	1.43E-64	1.76E-63	yes	up	ref_gene	mRNA
FORC47_RS01355	FORC47_RS01355	D-alanine--D-alanine ligase	2.195	1.134501151	2.20E-64	2.69E-63	yes	up	ref_gene	mRNA
FORC47_RS22755	recJ	single-stranded-DNA-specific exonuclease RecJ	3.971	1.989385216	4.36E-64	5.33E-63	yes	up	ref_gene	mRNA
FORC47_RS26530	FORC47_RS26530	YvcK family protein	2.014	1.010330721	6.87E-64	8.36E-63	yes	up	ref_gene	mRNA
FORC47_RS24175	FORC47_RS24175	DNA translocase FtsK	2.523	1.335157185	4.01E-63	4.85E-62	yes	up	ref_gene	mRNA
FORC47_RS02915	opuD	glycine betaine transporter OpuD	3.821	1.934029948	1.57E-62	1.89E-61	yes	up	ref_gene	mRNA
FORC47_RS18215	FORC47_RS18215	serine hydrolase	2.509	1.327128414	4.45E-62	5.35E-61	yes	up	ref_gene	mRNA
FORC47_RS25075	menB	1%2C4-dihydroxy-2-naphthoyl-CoA synthase	2.023	1.016340602	6.44E-62	7.72E-61	yes	up	ref_gene	mRNA
FORC47_RS01720	purK	5-(carboxyamino)imidazole ribonucleotide synthase	3.812	1.930608835	7.11E-62	8.50E-61	yes	up	ref_gene	mRNA
FORC47_RS07790	gpsA	NAD(P)H-dependent glycerol-3-phosphate dehydrogenase	2.3	1.20168056	9.92E-62	1.18E-60	yes	up	ref_gene	mRNA
FORC47_RS19395	plcA	phosphatidylinositol diacylglycerol-lyase	3.388	1.760455966	1.11E-61	1.32E-60	yes	up	ref_gene	mRNA
FORC47_RS26110	FORC47_RS26110	cation:proton antiporter	11.443	3.51645334	1.76E-61	2.08E-60	yes	up	ref_gene	mRNA
FORC47_RS26760	wecB	UDP-N-acetylglucosamine 2-epimerase (non-hydrolyzing)	2.398	1.26165311	1.84E-61	2.18E-60	yes	up	ref_gene	mRNA
FORC47_RS22955	mreD	rod shape-determining protein MreD	6.174	2.626166635	3.53E-61	4.17E-60	yes	up	ref_gene	mRNA
FORC47_RS10710	FORC47_RS10710	ABC-F family ATP-binding cassette domain-containing protein	2.604	1.380797165	1.94E-60	2.28E-59	yes	up	ref_gene	mRNA
FORC47_RS20305	FORC47_RS20305	formamidase	2.685	1.424968787	2.69E-60	3.15E-59	yes	up	ref_gene	mRNA
FORC47_RS27630	FORC47_RS27630	M4 family metallopeptidase	2.045	1.031856981	3.82E-60	4.45E-59	yes	up	ref_gene	mRNA
FORC47_RS20100	FORC47_RS20100	YggT family protein	2.559	1.355702784	6.19E-60	7.21E-59	yes	up	ref_gene	mRNA
FORC47_RS03625	FORC47_RS03625	peptide MFS transporter	6.521	2.705125144	6.20E-59	7.18E-58	yes	up	ref_gene	mRNA
FORC47_RS00830	FORC47_RS00830	energy-coupling factor ABC transporter ATP-binding protein	4.364	2.125769191	1.45E-58	1.67E-57	yes	up	ref_gene	mRNA
FORC47_RS03205	FORC47_RS03205	metalloregulator ArsR/SmtB family transcription factor	3.097	1.630831361	1.45E-58	1.67E-57	yes	up	ref_gene	mRNA
FORC47_RS06700	potD	spermidine/putrescine ABC transporter substrate-binding protein PotD	6.451	2.689443521	5.74E-58	6.58E-57	yes	up	ref_gene	mRNA
FORC47_RS01230	FORC47_RS01230	TatD family hydrolase	10.097	3.335891334	1.17E-57	1.33E-56	yes	up	ref_gene	mRNA
FORC47_RS24800	FORC47_RS24800	lipoprotein BA_5634 family protein	8.889	3.151951683	1.21E-57	1.37E-56	yes	up	ref_gene	mRNA
FORC47_RS19545	FORC47_RS19545	ABC transporter permease	2.706	1.436217928	1.77E-57	2.01E-56	yes	up	ref_gene	mRNA
FORC47_RS21465	FORC47_RS21465	FtsW/RodA/SpoVE family cell cycle protein	2.458	1.297526903	2.36E-57	2.68E-56	yes	up	ref_gene	mRNA
FORC47_RS07200	FORC47_RS07200	dicarboxylate/amino acid:cation symporter	2.192	1.132562071	2.93E-57	3.31E-56	yes	up	ref_gene	mRNA
FORC47_RS24780	FORC47_RS24780	DUF4247 domain-containing protein	3.078	1.621969847	4.51E-57	5.08E-56	yes	up	ref_gene	mRNA
FORC47_RS22910	FORC47_RS22910	sporulation initiation phosphotransferase B	3.59	1.844134911	1.22E-56	1.37E-55	yes	up	ref_gene	mRNA
FORC47_RS26930	FORC47_RS26930	DUF4870 domain-containing protein	6.71	2.746357791	1.47E-56	1.65E-55	yes	up	ref_gene	mRNA
FORC47_RS10970	FORC47_RS10970	DegV family protein	2.671	1.417485425	1.60E-56	1.79E-55	yes	up	ref_gene	mRNA
FORC47_RS21565	FORC47_RS21565	TlyA family RNA methyltransferase	2.199	1.136817114	6.63E-56	7.38E-55	yes	up	ref_gene	mRNA
FORC47_RS12025	FORC47_RS12025	DEAD/DEAH box helicase	3.867	1.951351262	3.19E-55	3.54E-54	yes	up	ref_gene	mRNA
FORC47_RS17645	FORC47_RS17645	SDR family oxidoreductase	4.052	2.01873184	4.69E-54	5.12E-53	yes	up	ref_gene	mRNA
FORC47_RS28320	mnmG	tRNA uridine-5-carboxymethylaminomethyl(34) synthesis enzyme MnmG	2.554	1.35264886	1.67E-53	1.82E-52	yes	up	ref_gene	mRNA
FORC47_RS07760	FORC47_RS07760	type 2 isopentenyl-diphosphate Delta-isomerase	2.608	1.382957816	4.12E-53	4.46E-52	yes	up	ref_gene	mRNA
FORC47_RS19650	rbfA	30S ribosome-binding factor RbfA	2.608	1.382957816	4.12E-53	4.46E-52	yes	up	ref_gene	mRNA
FORC47_RS00980	glmM	phosphoglucosamine mutase	2.073	1.051721587	6.25E-53	6.74E-52	yes	up	ref_gene	mRNA
FORC47_RS01525	FORC47_RS01525	ABC-F family ATP-binding cassette domain-containing protein	2.126	1.088128815	1.78E-52	1.91E-51	yes	up	ref_gene	mRNA
FORC47_RS22265	mtaB	tRNA (N(6)-L-threonylcarbamoyladenosine(37)-C(2))-methylthiotransferase MtaB	3.44	1.782410444	1.21E-51	1.28E-50	yes	up	ref_gene	mRNA
FORC47_RS21710	mntR	transcriptional regulator MntR	2.995	1.582362918	2.24E-50	2.36E-49	yes	up	ref_gene	mRNA
FORC47_RS21145	FORC47_RS21145	aldo/keto reductase	2.298	1.200254198	1.98E-49	2.08E-48	yes	up	ref_gene	mRNA
FORC47_RS19710	uppS	isoprenyl transferase	5.258	2.394411532	2.32E-49	2.42E-48	yes	up	ref_gene	mRNA
FORC47_RS03265	FORC47_RS03265	VWA domain-containing protein	2.989	1.579544335	1.29E-48	1.34E-47	yes	up	ref_gene	mRNA
FORC47_RS23430	FORC47_RS23430	endonuclease MutS2	2.45	1.292981271	1.79E-48	1.84E-47	yes	up	ref_gene	mRNA
FORC47_RS05590	hemH	ferrochelatase	2.039	1.028166859	4.11E-48	4.22E-47	yes	up	ref_gene	mRNA
FORC47_RS20575	FORC47_RS20575	EAL domain-containing protein	3.221	1.68729185	1.28E-47	1.30E-46	yes	up	ref_gene	mRNA
FORC47_RS19925	rsmB	16S rRNA (cytosine(967)-C(5))-methyltransferase RsmB	2.963	1.567032945	1.84E-47	1.87E-46	yes	up	ref_gene	mRNA
FORC47_RS19420	FORC47_RS19420	LTA synthase family protein	4.663	2.221294686	7.30E-47	7.42E-46	yes	up	ref_gene	mRNA
FORC47_RS22810	ruvB	Holliday junction branch migration DNA helicase RuvB	2.727	1.447300688	1.43E-46	1.45E-45	yes	up	ref_gene	mRNA
FORC47_RS16845	FORC47_RS16845	endonuclease	3.121	1.64188071	1.89E-46	1.91E-45	yes	up	ref_gene	mRNA
FORC47_RS01725	purB	adenylosuccinate lyase	2.877	1.524338248	1.41E-45	1.42E-44	yes	up	ref_gene	mRNA
FORC47_RS00805	rpmJ	50S ribosomal protein L36	4.666	2.222230557	2.77E-45	2.78E-44	yes	up	ref_gene	mRNA
FORC47_RS07590	mprF	bifunctional lysylphosphatidylglycerol flippase/synthetase MprF	2.593	1.374365482	4.89E-45	4.90E-44	yes	up	ref_gene	mRNA
FORC47_RS03560	sph	sphingomyelinase C	2.801	1.486149004	9.54E-45	9.49E-44	yes	up	ref_gene	mRNA
FORC47_RS28330	FORC47_RS28330	protein jag	2.968	1.569718129	2.05E-44	2.04E-43	yes	up	ref_gene	mRNA
FORC47_RS00800	infA	translation initiation factor IF-1	5.012	2.325256647	2.35E-44	2.33E-43	yes	up	ref_gene	mRNA
FORC47_RS08250	FORC47_RS08250	DUF11 domain-containing protein	3.769	1.914173133	3.31E-44	3.27E-43	yes	up	ref_gene	mRNA
FORC47_RS19975	FORC47_RS19975	fibronectin-binding domain-containing protein	4.861	2.281396684	6.70E-44	6.58E-43	yes	up	ref_gene	mRNA
FORC47_RS18470	parE	DNA topoisomerase IV subunit B	3.473	1.796383387	8.78E-44	8.59E-43	yes	up	ref_gene	mRNA
FORC47_RS30150	FORC47_RS30150	S-layer homology domain-containing protein	2.021	1.01511701	1.48E-43	1.44E-42	yes	up	ref_gene	mRNA
FORC47_RS01805	pcrA	DNA helicase PcrA	3.003	1.58630787	2.39E-43	2.32E-42	yes	up	ref_gene	mRNA
FORC47_RS18195	FORC47_RS18195	DUF11 domain-containing protein	3.45	1.786733217	3.41E-43	3.31E-42	yes	up	ref_gene	mRNA
FORC47_RS00095	FORC47_RS00095	DUF3797 domain-containing protein	2.546	1.347956043	3.70E-43	3.58E-42	yes	up	ref_gene	mRNA
FORC47_RS15070	aroA	3-phosphoshikimate 1-carboxyvinyltransferase	2.083	1.058697287	9.13E-43	8.82E-42	yes	up	ref_gene	mRNA
FORC47_RS02395	FORC47_RS02395	YihY/virulence factor BrkB family protein	3.026	1.597596679	9.51E-43	9.18E-42	yes	up	ref_gene	mRNA
FORC47_RS00975	FORC47_RS00975	CdaR family protein	2.075	1.05295932	1.74E-42	1.67E-41	yes	up	ref_gene	mRNA
FORC47_RS12575	bla	class A beta-lactamase Bla1	14.503	3.858241857	3.09E-42	2.97E-41	yes	up	ref_gene	mRNA
FORC47_RS22390	yqeH	ribosome biogenesis GTPase YqeH	3.966	1.987524874	7.03E-42	6.73E-41	yes	up	ref_gene	mRNA
FORC47_RS16330	bla	class A beta-lactamase	8.35	3.061857072	7.92E-42	7.57E-41	yes	up	ref_gene	mRNA
FORC47_RS15420	FORC47_RS15420	DUF58 domain-containing protein	2.959	1.56493444	4.48E-41	4.25E-40	yes	up	ref_gene	mRNA
FORC47_RS16055	FORC47_RS16055	Na-translocating system protein MpsB	9.701	3.278171511	5.06E-41	4.81E-40	yes	up	ref_gene	mRNA
FORC47_RS26670	FORC47_RS26670	S41 family peptidase	2.555	1.353272967	7.11E-41	6.72E-40	yes	up	ref_gene	mRNA
FORC47_RS17075	FORC47_RS17075	ATP synthase subunit I	2.905	1.538684667	7.28E-41	6.88E-40	yes	up	ref_gene	mRNA
FORC47_RS19800	trmD	tRNA (guanosine(37)-N1)-methyltransferase TrmD	7.1	2.827868208	8.54E-40	7.99E-39	yes	up	ref_gene	mRNA
FORC47_RS22145	ispH	4-hydroxy-3-methylbut-2-enyl diphosphate reductase	3.152	1.65613645	9.37E-40	8.73E-39	yes	up	ref_gene	mRNA
FORC47_RS03510	rbsC	ribose ABC transporter permease	3.687	1.882305562	1.41E-39	1.31E-38	yes	up	ref_gene	mRNA
FORC47_RS06995	FORC47_RS06995	GNAT family N-acetyltransferase	2.213	1.145925739	2.03E-39	1.89E-38	yes	up	ref_gene	mRNA
FORC47_RS07525	FORC47_RS07525	sulfite exporter TauE/SafE family protein	2.039	1.027947854	2.58E-39	2.40E-38	yes	up	ref_gene	mRNA
FORC47_RS08195	FORC47_RS08195	5'-3' exonuclease	6.148	2.620153809	4.34E-39	4.02E-38	yes	up	ref_gene	mRNA
FORC47_RS01980	nhaC	Na+/H+ antiporter NhaC	2.795	1.482928647	4.50E-39	4.16E-38	yes	up	ref_gene	mRNA
FORC47_RS25155	glgB	1%2C4-alpha-glucan branching protein GlgB	2.949	1.560160504	4.59E-39	4.24E-38	yes	up	ref_gene	mRNA
FORC47_RS07105	dltB	D-alanyl-lipoteichoic acid biosynthesis protein DltB	2.663	1.412830709	5.73E-39	5.28E-38	yes	up	ref_gene	mRNA
FORC47_RS20340	ctaA	heme A synthase	2.546	1.348469671	9.36E-39	8.59E-38	yes	up	ref_gene	mRNA
FORC47_RS19755	trmFO	FADH(2)-oxidizing methylenetetrahydrofolate--tRNA-(uracil(54)-C(5))-methyltransferase TrmFO	3.361	1.748887123	1.19E-38	1.09E-37	yes	up	ref_gene	mRNA
FORC47_RS22700	FORC47_RS22700	Rrf2 family transcriptional regulator	2.371	1.245241563	1.57E-38	1.43E-37	yes	up	ref_gene	mRNA
FORC47_RS07350	FORC47_RS07350	LTA synthase family protein	2.229	1.156531895	1.58E-38	1.44E-37	yes	up	ref_gene	mRNA
FORC47_RS14365	FORC47_RS14365	UvrD-helicase domain-containing protein	5.139	2.361486431	1.65E-38	1.50E-37	yes	up	ref_gene	mRNA
FORC47_RS19325	FORC47_RS19325	bifunctional diguanylate cyclase/phosphodiesterase	3.786	1.920593866	2.32E-38	2.10E-37	yes	up	ref_gene	mRNA
FORC47_RS07575	FORC47_RS07575	HAMP domain-containing histidine kinase	3.004	1.586774508	4.92E-38	4.44E-37	yes	up	ref_gene	mRNA
FORC47_RS19705	cdsA	phosphatidate cytidylyltransferase	5.191	2.376090162	7.70E-38	6.93E-37	yes	up	ref_gene	mRNA
FORC47_RS00070	dacA	D-alanyl-D-alanine carboxypeptidase DacA	3.599	1.84772533	9.17E-38	8.22E-37	yes	up	ref_gene	mRNA
FORC47_RS26240	murB	UDP-N-acetylmuramate dehydrogenase	2.059	1.041901884	9.56E-38	8.56E-37	yes	up	ref_gene	mRNA
FORC47_RS02625	recX	recombination regulator RecX	2.167	1.115982541	1.42E-37	1.27E-36	yes	up	ref_gene	mRNA
FORC47_RS19105	FORC47_RS19105	aminotransferase class I/II-fold pyridoxal phosphate-dependent enzyme	3.305	1.724490468	4.77E-37	4.23E-36	yes	up	ref_gene	mRNA
FORC47_RS11600	FORC47_RS11600	ABC transporter ATP-binding protein	13.666	3.772511983	1.23E-36	1.08E-35	yes	up	ref_gene	mRNA
FORC47_RS00585	rlmB	23S rRNA (guanosine(2251)-2'-O)-methyltransferase RlmB	3.493	1.804660817	1.58E-36	1.39E-35	yes	up	ref_gene	mRNA
FORC47_RS13380	FORC47_RS13380	cytochrome P450	3.756	1.909299707	2.39E-36	2.09E-35	yes	up	ref_gene	mRNA
FORC47_RS26180	FORC47_RS26180	alanine:cation symporter family protein	3.61	1.851869775	2.58E-36	2.25E-35	yes	up	ref_gene	mRNA
FORC47_RS17085	FORC47_RS17085	MerR family transcriptional regulator	2.484	1.312925161	2.93E-36	2.55E-35	yes	up	ref_gene	mRNA
FORC47_RS24265	FORC47_RS24265	polysaccharide biosynthesis protein	4.905	2.294115646	3.12E-36	2.72E-35	yes	up	ref_gene	mRNA
FORC47_RS01880	gatA	Asp-tRNA(Asn)/Glu-tRNA(Gln) amidotransferase subunit GatA	2.931	1.551355911	8.50E-36	7.39E-35	yes	up	ref_gene	mRNA
FORC47_RS24025	acuA	acetoin utilization protein acetyltransferase AcuA	2.269	1.181994994	1.14E-35	9.84E-35	yes	up	ref_gene	mRNA
FORC47_RS26150	FORC47_RS26150	TIGR00730 family Rossman fold protein	2.595	1.375595326	2.47E-35	2.14E-34	yes	up	ref_gene	mRNA
FORC47_RS06060	trpS	tryptophan--tRNA ligase	3.393	1.762621234	2.55E-35	2.20E-34	yes	up	ref_gene	mRNA
FORC47_RS00630	rplL	50S ribosomal protein L7/L12	3.931	1.975024091	2.78E-35	2.40E-34	yes	up	ref_gene	mRNA
FORC47_RS13870	FORC47_RS13870	FAD-binding oxidoreductase	2.641	1.401154179	4.12E-35	3.54E-34	yes	up	ref_gene	mRNA
FORC47_RS00580	FORC47_RS00580	Mini-ribonuclease 3	4.069	2.024781044	4.48E-35	3.84E-34	yes	up	ref_gene	mRNA
FORC47_RS22740	FORC47_RS22740	D-tyrosyl-tRNA(Tyr) deacylase	3.055	1.611148995	4.49E-35	3.83E-34	yes	up	ref_gene	mRNA
FORC47_RS24435	leuS	leucine--tRNA ligase	2.05	1.035815775	4.70E-35	4.01E-34	yes	up	ref_gene	mRNA
FORC47_RS16765	FORC47_RS16765	MFS transporter	4.401	2.13782968	5.27E-35	4.49E-34	yes	up	ref_gene	mRNA
FORC47_RS15825	FORC47_RS15825	YdcF family protein	2.217	1.148738724	6.34E-35	5.38E-34	yes	up	ref_gene	mRNA
FORC47_RS19960	FORC47_RS19960	DUF370 domain-containing protein	3.982	1.993449708	1.64E-34	1.39E-33	yes	up	ref_gene	mRNA
FORC47_RS06765	FORC47_RS06765	FadR family transcriptional regulator	2.176	1.121975074	2.46E-34	2.07E-33	yes	up	ref_gene	mRNA
FORC47_RS15805	FORC47_RS15805	copper homeostasis protein CutC	2.436	1.284323261	8.69E-34	7.27E-33	yes	up	ref_gene	mRNA
FORC47_RS05225	FORC47_RS05225	ATP-binding protein	3.407	1.768690272	1.47E-33	1.23E-32	yes	up	ref_gene	mRNA
FORC47_RS02630	FORC47_RS02630	YfhH family protein	2.204	1.139886357	1.99E-33	1.65E-32	yes	up	ref_gene	mRNA
FORC47_RS28340	rnpA	ribonuclease P protein component	6.407	2.679671965	2.87E-33	2.38E-32	yes	up	ref_gene	mRNA
FORC47_RS02550	FORC47_RS02550	serine hydrolase	2.504	1.324414127	6.77E-33	5.57E-32	yes	up	ref_gene	mRNA
FORC47_RS22615	FORC47_RS22615	U32 family peptidase	3.325	1.733301639	9.21E-33	7.56E-32	yes	up	ref_gene	mRNA
FORC47_RS20165	spoVE	stage V sporulation protein E	3.099	1.631649447	1.39E-32	1.14E-31	yes	up	ref_gene	mRNA
FORC47_RS00575	cysS	cysteine--tRNA ligase	4.418	2.143246256	2.81E-32	2.28E-31	yes	up	ref_gene	mRNA
FORC47_RS18915	FORC47_RS18915	LysR substrate-binding domain-containing protein	5.218	2.38362081	3.38E-32	2.73E-31	yes	up	ref_gene	mRNA
FORC47_RS00590	FORC47_RS00590	NYN domain-containing protein	3.825	1.93554113	5.12E-32	4.13E-31	yes	up	ref_gene	mRNA
FORC47_RS24770	FORC47_RS24770	YitT family protein	3.218	1.686177657	6.37E-32	5.13E-31	yes	up	ref_gene	mRNA
FORC47_RS18975	FORC47_RS18975	YneF family protein	2.037	1.026398266	6.94E-32	5.58E-31	yes	up	ref_gene	mRNA
FORC47_RS01885	gatB	Asp-tRNA(Asn)/Glu-tRNA(Gln) amidotransferase subunit GatB	2.078	1.054853475	9.09E-32	7.30E-31	yes	up	ref_gene	mRNA
FORC47_RS18330	FORC47_RS18330	DUF1641 domain-containing protein	5.667	2.502591192	2.11E-31	1.69E-30	yes	up	ref_gene	mRNA
FORC47_RS07735	FORC47_RS07735	YpdA family putative bacillithiol disulfide reductase	2.683	1.423839033	2.20E-31	1.75E-30	yes	up	ref_gene	mRNA
FORC47_RS02405	cadA	cadmium-translocating P-type ATPase	2.387	1.255286111	3.57E-31	2.84E-30	yes	up	ref_gene	mRNA
FORC47_RS19425	FORC47_RS19425	dynamin family protein	3.239	1.695609348	4.87E-31	3.87E-30	yes	up	ref_gene	mRNA
FORC47_RS22605	greA	transcription elongation factor GreA	2.373	1.246512447	8.49E-31	6.74E-30	yes	up	ref_gene	mRNA
FORC47_RS19185	FORC47_RS19185	DUF420 domain-containing protein	2.135	1.094013308	1.84E-30	1.45E-29	yes	up	ref_gene	mRNA
FORC47_RS22130	FORC47_RS22130	deoxyribonuclease IV	3.119	1.640934725	2.32E-30	1.82E-29	yes	up	ref_gene	mRNA
FORC47_RS29645	FORC47_RS29645	DUF4352 domain-containing protein	7.158	2.839626179	2.37E-30	1.86E-29	yes	up	ref_gene	mRNA
FORC47_RS01975	FORC47_RS01975	transcriptional regulator	3.415	1.771796183	3.80E-30	2.97E-29	yes	up	ref_gene	mRNA
FORC47_RS10920	thyA	thymidylate synthase	3.342	1.740558837	5.47E-30	4.27E-29	yes	up	ref_gene	mRNA
FORC47_RS22385	aroE	shikimate dehydrogenase	3.626	1.858241857	6.54E-30	5.09E-29	yes	up	ref_gene	mRNA
FORC47_RS10145	FORC47_RS10145	DUF2628 domain-containing protein	2.632	1.395913998	8.55E-30	6.62E-29	yes	up	ref_gene	mRNA
FORC47_RS19940	priA	primosomal protein N'	3.618	1.855341967	1.85E-29	1.43E-28	yes	up	ref_gene	mRNA
FORC47_RS26545	FORC47_RS26545	DUF368 domain-containing protein	5.878	2.555413862	3.40E-29	2.61E-28	yes	up	ref_gene	mRNA
FORC47_RS07835	menG	2-heptaprenyl-1%2C4-naphthoquinone methyltransferase	3.001	1.585203	4.79E-29	3.67E-28	yes	up	ref_gene	mRNA
FORC47_RS04530	FORC47_RS04530	ABC transporter ATP-binding protein/permease	2.01	1.006838349	6.23E-29	4.77E-28	yes	up	ref_gene	mRNA
FORC47_RS11340	FORC47_RS11340	peptidylprolyl isomerase	3.105	1.63466492	3.73E-28	2.84E-27	yes	up	ref_gene	mRNA
FORC47_RS04700	FORC47_RS04700	RsmD family RNA methyltransferase	5.061	2.339368547	4.14E-28	3.15E-27	yes	up	ref_gene	mRNA
FORC47_RS19690	proS	proline--tRNA ligase	2.49	1.316262527	1.13E-27	8.55E-27	yes	up	ref_gene	mRNA
FORC47_RS01810	ligA	NAD-dependent DNA ligase LigA	2.269	1.182172305	1.67E-27	1.25E-26	yes	up	ref_gene	mRNA
FORC47_RS28345	rpmH	50S ribosomal protein L34	2.558	1.354809242	1.74E-27	1.30E-26	yes	up	ref_gene	mRNA
FORC47_RS19930	fmt	methionyl-tRNA formyltransferase	3.058	1.612647899	1.76E-27	1.32E-26	yes	up	ref_gene	mRNA
FORC47_RS01540	FORC47_RS01540	CPBP family intramembrane metalloprotease	3.113	1.638116043	2.50E-27	1.86E-26	yes	up	ref_gene	mRNA
FORC47_RS19830	ftsY	signal recognition particle-docking protein FtsY	2.196	1.134674118	3.15E-27	2.35E-26	yes	up	ref_gene	mRNA
FORC47_RS06300	exsF	exosporium protein ExsF	37.012	5.209917296	5.33E-27	3.97E-26	yes	up	ref_gene	mRNA
FORC47_RS04045	FORC47_RS04045	NCS2 family permease	6.768	2.758706184	5.60E-27	4.17E-26	yes	up	ref_gene	mRNA
FORC47_RS23465	asnS	asparagine--tRNA ligase	3.81	1.929809376	6.05E-27	4.49E-26	yes	up	ref_gene	mRNA
FORC47_RS05430	prsA	peptidylprolyl isomerase PrsA	3.644	1.86553435	8.31E-27	6.16E-26	yes	up	ref_gene	mRNA
FORC47_RS01405	FORC47_RS01405	RNA-binding transcriptional accessory protein	2.726	1.446586997	9.39E-27	6.95E-26	yes	up	ref_gene	mRNA
FORC47_RS08095	FORC47_RS08095	ATP-dependent DNA helicase	4.005	2.001645983	1.12E-26	8.29E-26	yes	up	ref_gene	mRNA
FORC47_RS28325	mnmE	tRNA uridine-5-carboxymethylaminomethyl(34) synthesis GTPase MnmE	3.595	1.846169025	1.88E-26	1.38E-25	yes	up	ref_gene	mRNA
FORC47_RS27230	FORC47_RS27230	CpsD/CapB family tyrosine-protein kinase	4.375	2.129308125	2.12E-26	1.56E-25	yes	up	ref_gene	mRNA
FORC47_RS09765	FORC47_RS09765	D-alanyl-D-alanine carboxypeptidase	2.323	1.215684239	2.59E-26	1.89E-25	yes	up	ref_gene	mRNA
FORC47_RS08670	FORC47_RS08670	TrmB family transcriptional regulator	3.548	1.827060202	4.20E-26	3.05E-25	yes	up	ref_gene	mRNA
FORC47_RS23435	polX	DNA polymerase/3'-5' exonuclease PolX	2.293	1.197120021	4.44E-26	3.22E-25	yes	up	ref_gene	mRNA
FORC47_RS22800	queA	tRNA preQ1(34) S-adenosylmethionine ribosyltransferase-isomerase QueA	2.623	1.391127478	5.00E-26	3.62E-25	yes	up	ref_gene	mRNA
FORC47_RS06935	FORC47_RS06935	MarR family transcriptional regulator	8.522	3.09120352	6.47E-26	4.68E-25	yes	up	ref_gene	mRNA
FORC47_RS24170	FORC47_RS24170	nicotinate phosphoribosyltransferase	2.143	1.099423131	7.99E-26	5.77E-25	yes	up	ref_gene	mRNA
FORC47_RS10350	FORC47_RS10350	histidine phosphatase family protein	10.927	3.449868088	8.29E-26	5.97E-25	yes	up	ref_gene	mRNA
FORC47_RS01815	FORC47_RS01815	CamS family sex pheromone protein	2.45	1.292684756	9.68E-26	6.96E-25	yes	up	ref_gene	mRNA
FORC47_RS18790	putP	sodium/proline symporter PutP	7.114	2.830656026	1.04E-25	7.49E-25	yes	up	ref_gene	mRNA
FORC47_RS19900	rpe	ribulose-phosphate 3-epimerase	2.637	1.398657919	1.05E-25	7.52E-25	yes	up	ref_gene	mRNA
FORC47_RS08010	dnaD	DNA replication protein DnaD	2.418	1.273766671	1.56E-25	1.11E-24	yes	up	ref_gene	mRNA
FORC47_RS28280	ychF	redox-regulated ATPase YchF	2.814	1.492760183	2.28E-25	1.62E-24	yes	up	ref_gene	mRNA
FORC47_RS09905	FORC47_RS09905	siderophore biosynthesis protein	4.864	2.28226814	3.66E-25	2.58E-24	yes	up	ref_gene	mRNA
FORC47_RS17885	FORC47_RS17885	DUF2871 family protein	2.797	1.483989973	5.09E-25	3.58E-24	yes	up	ref_gene	mRNA
FORC47_RS16085	menA	1%2C4-dihydroxy-2-naphthoate polyprenyltransferase	5.71	2.513593686	7.94E-25	5.56E-24	yes	up	ref_gene	mRNA
FORC47_RS20960	FORC47_RS20960	DUF1002 domain-containing protein	3.208	1.681898592	1.82E-24	1.27E-23	yes	up	ref_gene	mRNA
FORC47_RS28050	FORC47_RS28050	MBOAT family protein	3.701	1.887989201	4.17E-24	2.88E-23	yes	up	ref_gene	mRNA
FORC47_RS16760	FORC47_RS16760	MarR family transcriptional regulator	4.87	2.283917877	4.95E-24	3.42E-23	yes	up	ref_gene	mRNA
FORC47_RS06670	FORC47_RS06670	anti-repressor SinI family protein	2.676	1.419944452	6.32E-24	4.36E-23	yes	up	ref_gene	mRNA
FORC47_RS26570	lgt	prolipoprotein diacylglyceryl transferase	2.145	1.101098381	6.54E-24	4.50E-23	yes	up	ref_gene	mRNA
FORC47_RS27295	FORC47_RS27295	YwmB family TATA-box binding protein	2.34	1.226485145	8.75E-24	6.01E-23	yes	up	ref_gene	mRNA
FORC47_RS25150	glgC	glucose-1-phosphate adenylyltransferase	3.583	1.841093575	1.21E-23	8.29E-23	yes	up	ref_gene	mRNA
FORC47_RS30855	FORC47_RS30855	hypothetical protein	3.8	1.925911684	1.78E-23	1.22E-22	yes	up	ref_gene	mRNA
FORC47_RS31000	FORC47_RS31000	hypothetical protein	17.448	4.125028398	1.81E-23	1.24E-22	yes	up	ref_gene	mRNA
FORC47_RS25575	phnA	alkylphosphonate utilization operon protein PhnA	4.01	2.003765515	1.87E-23	1.28E-22	yes	up	ref_gene	mRNA
FORC47_RS23685	accA	acetyl-CoA carboxylase carboxyl transferase subunit alpha	2.833	1.502098047	2.07E-23	1.41E-22	yes	up	ref_gene	mRNA
FORC47_RS26290	speG	spermidine N1-acetyltransferase	2.672	1.418135177	2.38E-23	1.62E-22	yes	up	ref_gene	mRNA
FORC47_RS10925	dfrA	dihydrofolate reductase	2.598	1.377251285	3.09E-23	2.10E-22	yes	up	ref_gene	mRNA
FORC47_RS04615	FORC47_RS04615	SpaA isopeptide-forming pilin-related protein	2.652	1.40699462	4.31E-23	2.92E-22	yes	up	ref_gene	mRNA
FORC47_RS27565	pyrG	CTP synthase	3.238	1.694980586	4.50E-23	3.04E-22	yes	up	ref_gene	mRNA
FORC47_RS13665	FORC47_RS13665	DUF4269 domain-containing protein	3.198	1.677138401	5.20E-23	3.51E-22	yes	up	ref_gene	mRNA
FORC47_RS07435	FORC47_RS07435	Na+/H+ antiporter NhaC family protein	3.393	1.762458319	1.00E-22	6.71E-22	yes	up	ref_gene	mRNA
FORC47_RS23575	nrdR	transcriptional regulator NrdR	2.511	1.32804516	1.15E-22	7.67E-22	yes	up	ref_gene	mRNA
FORC47_RS15415	FORC47_RS15415	MoxR family ATPase	2.26	1.176258882	1.30E-22	8.67E-22	yes	up	ref_gene	mRNA
FORC47_RS12155	FORC47_RS12155	YxeA family protein	9.273	3.213084575	1.47E-22	9.79E-22	yes	up	ref_gene	mRNA
FORC47_RS09060	FORC47_RS09060	DUF3934 domain-containing protein	7.402	2.887989201	1.51E-22	1.01E-21	yes	up	ref_gene	mRNA
FORC47_RS23885	ackA	acetate kinase	3.592	1.844821342	1.93E-22	1.28E-21	yes	up	ref_gene	mRNA
FORC47_RS08000	FORC47_RS08000	DUF5590 domain-containing protein	2.71	1.438481948	2.17E-22	1.44E-21	yes	up	ref_gene	mRNA
FORC47_RS24975	FORC47_RS24975	ABC transporter permease	3.641	1.864142459	2.43E-22	1.60E-21	yes	up	ref_gene	mRNA
FORC47_RS22270	FORC47_RS22270	16S rRNA (uracil(1498)-N(3))-methyltransferase	5.323	2.412148422	2.98E-22	1.97E-21	yes	up	ref_gene	mRNA
FORC47_RS19945	coaBC	bifunctional phosphopantothenoylcysteine decarboxylase/phosphopantothenate--cysteine ligase CoaBC	5.219	2.383825811	3.07E-22	2.02E-21	yes	up	ref_gene	mRNA
FORC47_RS21185	FORC47_RS21185	GNAT family N-acetyltransferase	2.489	1.315590161	3.48E-22	2.29E-21	yes	up	ref_gene	mRNA
FORC47_RS02695	hemL	glutamate-1-semialdehyde-2%2C1-aminomutase	2.065	1.046282774	3.57E-22	2.35E-21	yes	up	ref_gene	mRNA
FORC47_RS22330	holA	DNA polymerase III subunit delta	2.286	1.192527159	4.15E-22	2.72E-21	yes	up	ref_gene	mRNA
FORC47_RS21520	FORC47_RS21520	DUF2627 domain-containing protein	2.024	1.017360104	7.71E-22	5.04E-21	yes	up	ref_gene	mRNA
FORC47_RS19835	smc	chromosome segregation protein SMC	2.465	1.301633465	8.64E-22	5.63E-21	yes	up	ref_gene	mRNA
FORC47_RS14695	FORC47_RS14695	hypothetical protein	2.81	1.490510073	1.18E-21	7.70E-21	yes	up	ref_gene	mRNA
FORC47_RS19870	recG	ATP-dependent DNA helicase RecG	2.277	1.18698626	1.50E-21	9.71E-21	yes	up	ref_gene	mRNA
FORC47_RS06720	FORC47_RS06720	RluA family pseudouridine synthase	2.837	1.504571837	2.38E-21	1.53E-20	yes	up	ref_gene	mRNA
FORC47_RS16730	FORC47_RS16730	M15 family metallopeptidase	6.069	2.601466442	2.89E-21	1.87E-20	yes	up	ref_gene	mRNA
FORC47_RS10375	alr	alanine racemase	2.303	1.203744821	3.18E-21	2.05E-20	yes	up	ref_gene	mRNA
FORC47_RS22360	FORC47_RS22360	methyltransferase domain-containing protein	2.597	1.376944839	3.46E-21	2.23E-20	yes	up	ref_gene	mRNA
FORC47_RS00015	yaaA	S4 domain-containing protein YaaA	4.112	2.039992294	4.48E-21	2.87E-20	yes	up	ref_gene	mRNA
FORC47_RS25140	glgA	glycogen synthase GlgA	5.214	2.38252462	7.07E-21	4.52E-20	yes	up	ref_gene	mRNA
FORC47_RS24485	FORC47_RS24485	TIGR01212 family radical SAM protein	5.977	2.579440136	8.72E-21	5.57E-20	yes	up	ref_gene	mRNA
FORC47_RS27695	argS	arginine--tRNA ligase	2.968	1.569569892	9.39E-21	5.99E-20	yes	up	ref_gene	mRNA
FORC47_RS23475	pheS	phenylalanine--tRNA ligase subunit alpha	3.731	1.899608284	1.52E-20	9.62E-20	yes	up	ref_gene	mRNA
FORC47_RS22815	ruvA	Holliday junction DNA helicase RuvA	3.33	1.735644277	1.73E-20	1.09E-19	yes	up	ref_gene	mRNA
FORC47_RS06925	FORC47_RS06925	aspartyl-phosphate phosphatase Spo0E family protein	4.283	2.098556187	2.70E-20	1.70E-19	yes	up	ref_gene	mRNA
FORC47_RS06010	FORC47_RS06010	YjzC family protein	2.963	1.56725886	3.01E-20	1.89E-19	yes	up	ref_gene	mRNA
FORC47_RS18965	FORC47_RS18965	ABC transporter ATP-binding protein/permease	3.371	1.753059621	4.06E-20	2.55E-19	yes	up	ref_gene	mRNA
FORC47_RS00840	FORC47_RS00840	energy-coupling factor transporter transmembrane protein EcfT	3.722	1.895894399	4.33E-20	2.71E-19	yes	up	ref_gene	mRNA
FORC47_RS01945	rlmD	23S rRNA (uracil(1939)-C(5))-methyltransferase RlmD	4.43	2.147305318	5.16E-20	3.22E-19	yes	up	ref_gene	mRNA
FORC47_RS06685	potA	spermidine/putrescine ABC transporter ATP-binding protein PotA	4.43	2.147305318	5.16E-20	3.22E-19	yes	up	ref_gene	mRNA
FORC47_RS22795	tgt	tRNA guanosine(34) transglycosylase Tgt	2.256	1.173483057	6.01E-20	3.73E-19	yes	up	ref_gene	mRNA
FORC47_RS14880	FORC47_RS14880	YrzI family small protein	2.998	1.58406004	8.88E-20	5.49E-19	yes	up	ref_gene	mRNA
FORC47_RS27250	FORC47_RS27250	rod shape-determining protein	2.131	1.09130778	1.32E-19	8.12E-19	yes	up	ref_gene	mRNA
FORC47_RS07415	FORC47_RS07415	sodium-dependent transporter	2.649	1.405207095	1.46E-19	8.98E-19	yes	up	ref_gene	mRNA
FORC47_RS25690	FORC47_RS25690	transcriptional regulator	2.809	1.489842699	2.44E-19	1.49E-18	yes	up	ref_gene	mRNA
FORC47_RS23670	fxsA	membrane protein FxsA	2.624	1.392031706	2.63E-19	1.61E-18	yes	up	ref_gene	mRNA
FORC47_RS06800	FORC47_RS06800	TerC family protein	2.232	1.158195262	2.83E-19	1.73E-18	yes	up	ref_gene	mRNA
FORC47_RS19810	FORC47_RS19810	KH domain-containing protein	2.287	1.193334411	2.87E-19	1.75E-18	yes	up	ref_gene	mRNA
FORC47_RS26755	FORC47_RS26755	LCP family protein	2.921	1.546297851	3.35E-19	2.04E-18	yes	up	ref_gene	mRNA
FORC47_RS11275	FORC47_RS11275	sporulation protein	2.366	1.242691037	5.10E-19	3.08E-18	yes	up	ref_gene	mRNA
FORC47_RS13930	FORC47_RS13930	ABC transporter permease	4.272	2.094939559	7.18E-19	4.32E-18	yes	up	ref_gene	mRNA
FORC47_RS02635	FORC47_RS02635	YpzG family protein	158.622	7.309452969	7.50E-19	4.51E-18	yes	up	ref_gene	mRNA
FORC47_RS13910	FORC47_RS13910	HAMP domain-containing histidine kinase	5.206	2.380194561	7.83E-19	4.70E-18	yes	up	ref_gene	mRNA
FORC47_RS18920	FORC47_RS18920	CidA/LrgA family holin-like protein	25.732	4.685496337	9.91E-19	5.94E-18	yes	up	ref_gene	mRNA
FORC47_RS26525	whiA	DNA-binding protein WhiA	2.06	1.042892185	1.19E-18	7.13E-18	yes	up	ref_gene	mRNA
FORC47_RS23200	FORC47_RS23200	Rrf2 family transcriptional regulator	2.353	1.234667907	1.26E-18	7.52E-18	yes	up	ref_gene	mRNA
FORC47_RS23215	FORC47_RS23215	5'-nucleotidase%2C lipoprotein e(P4) family	2.435	1.283726144	1.31E-18	7.84E-18	yes	up	ref_gene	mRNA
FORC47_RS19950	rpoZ	DNA-directed RNA polymerase subunit omega	5.245	2.390974399	2.21E-18	1.31E-17	yes	up	ref_gene	mRNA
FORC47_RS29145	FORC47_RS29145	S-layer homology domain-containing protein	2.287	1.193474108	2.40E-18	1.42E-17	yes	up	ref_gene	mRNA
FORC47_RS23690	accD	acetyl-CoA carboxylase%2C carboxyltransferase subunit beta	2.47	1.30471505	2.46E-18	1.45E-17	yes	up	ref_gene	mRNA
FORC47_RS14815	coaW	type II pantothenate kinase	7.89	2.980107403	3.15E-18	1.87E-17	yes	up	ref_gene	mRNA
FORC47_RS19450	FORC47_RS19450	RicAFT regulatory complex protein RicA family protein	2.434	1.283263445	3.39E-18	2.00E-17	yes	up	ref_gene	mRNA
FORC47_RS27710	FORC47_RS27710	YxeA family protein	4.605	2.203253565	3.71E-18	2.19E-17	yes	up	ref_gene	mRNA
FORC47_RS29045	FORC47_RS29045	nitronate monooxygenase	2.088	1.062302456	3.73E-18	2.20E-17	yes	up	ref_gene	mRNA
FORC47_RS29085	FORC47_RS29085	nitronate monooxygenase	2.088	1.062302456	3.73E-18	2.20E-17	yes	up	ref_gene	mRNA
FORC47_RS23935	thiI	tRNA 4-thiouridine(8) synthase ThiI	3.241	1.696293577	4.58E-18	2.69E-17	yes	up	ref_gene	mRNA
FORC47_RS07740	ansA	asparaginase	2.688	1.426409115	5.11E-18	3.00E-17	yes	up	ref_gene	mRNA
FORC47_RS19480	FORC47_RS19480	TIGR00282 family metallophosphoesterase	3.724	1.896922325	5.62E-18	3.29E-17	yes	up	ref_gene	mRNA
FORC47_RS09845	thrC	threonine synthase	3.498	1.806459315	7.17E-18	4.19E-17	yes	up	ref_gene	mRNA
FORC47_RS07750	cmk	(d)CMP kinase	3.525	1.817599873	8.11E-18	4.73E-17	yes	up	ref_gene	mRNA
FORC47_RS28030	FORC47_RS28030	flippase	4.618	2.207166685	1.06E-17	6.17E-17	yes	up	ref_gene	mRNA
FORC47_RS21575	ispA	(2E%2C6E)-farnesyl diphosphate synthase	2.214	1.146723469	1.19E-17	6.93E-17	yes	up	ref_gene	mRNA
FORC47_RS27810	FORC47_RS27810	lipoate--protein ligase family protein	8.019	3.003466418	2.58E-17	1.48E-16	yes	up	ref_gene	mRNA
FORC47_RS07095	dltD	D-alanyl-lipoteichoic acid biosynthesis protein DltD	2.187	1.128801561	3.01E-17	1.73E-16	yes	up	ref_gene	mRNA
FORC47_RS16735	FORC47_RS16735	CapA family protein	4.817	2.268261282	3.14E-17	1.80E-16	yes	up	ref_gene	mRNA
FORC47_RS06695	potC	spermidine/putrescine ABC transporter permease PotC	6.345	2.665596779	3.39E-17	1.93E-16	yes	up	ref_gene	mRNA
FORC47_RS24645	FORC47_RS24645	glycosyltransferase family 39 protein	2.979	1.574743349	3.54E-17	2.02E-16	yes	up	ref_gene	mRNA
FORC47_RS11595	thrS	threonine--tRNA ligase	2.086	1.060898061	6.22E-17	3.54E-16	yes	up	ref_gene	mRNA
FORC47_RS30995	FORC47_RS30995	hypothetical protein	2.497	1.320100213	7.64E-17	4.33E-16	yes	up	ref_gene	mRNA
FORC47_RS15335	FORC47_RS15335	DUF2975 domain-containing protein	3.586	1.842474541	9.31E-17	5.27E-16	yes	up	ref_gene	mRNA
FORC47_RS28205	yycH	two-component system activity regulator YycH	2.197	1.135775833	1.08E-16	6.09E-16	yes	up	ref_gene	mRNA
FORC47_RS18875	ccdA	cytochrome c-type biogenesis protein CcdA	2.08	1.056655416	1.27E-16	7.18E-16	yes	up	ref_gene	mRNA
FORC47_RS03270	FORC47_RS03270	MoxR family ATPase	3.31	1.726626213	1.31E-16	7.35E-16	yes	up	ref_gene	mRNA
FORC47_RS20075	lspA	lipoprotein signal peptidase LspA	2.584	1.369464685	1.38E-16	7.75E-16	yes	up	ref_gene	mRNA
FORC47_RS17480	FORC47_RS17480	hypothetical protein	2.002	1.001464065	1.39E-16	7.82E-16	yes	up	ref_gene	mRNA
FORC47_RS20560	FORC47_RS20560	YkuJ family protein	2.768	1.46870473	1.69E-16	9.50E-16	yes	up	ref_gene	mRNA
FORC47_RS06285	exsY	exosporium protein ExsY	32.782	5.034830589	1.78E-16	9.94E-16	yes	up	ref_gene	mRNA
FORC47_RS25390	FORC47_RS25390	ArsB/NhaD family transporter	3.29	1.718064199	2.04E-16	1.14E-15	yes	up	ref_gene	mRNA
FORC47_RS06690	potB	spermidine/putrescine ABC transporter permease PotB	5.552	2.472951701	2.27E-16	1.27E-15	yes	up	ref_gene	mRNA
FORC47_RS19780	FORC47_RS19780	ribonuclease HII	4.759	2.25055928	2.53E-16	1.41E-15	yes	up	ref_gene	mRNA
FORC47_RS16610	FORC47_RS16610	S-layer homology domain-containing protein	2.163	1.112848904	4.57E-16	2.53E-15	yes	up	ref_gene	mRNA
FORC47_RS24785	FORC47_RS24785	DUF4178 domain-containing protein	2.82	1.495671778	4.88E-16	2.70E-15	yes	up	ref_gene	mRNA
FORC47_RS01520	tsaD	tRNA (adenosine(37)-N6)-threonylcarbamoyltransferase complex transferase subunit TsaD	2.788	1.479183655	5.14E-16	2.84E-15	yes	up	ref_gene	mRNA
FORC47_RS12215	FORC47_RS12215	D-alanyl-D-alanine carboxypeptidase	8.566	3.098556187	5.34E-16	2.94E-15	yes	up	ref_gene	mRNA
FORC47_RS24270	FORC47_RS24270	NAD(P)/FAD-dependent oxidoreductase	2.839	1.505519564	6.92E-16	3.80E-15	yes	up	ref_gene	mRNA
FORC47_RS19670	FORC47_RS19670	YlxR family protein	4.891	2.290087644	7.29E-16	4.00E-15	yes	up	ref_gene	mRNA
FORC47_RS14870	FORC47_RS14870	YrzI family small protein	2.774	1.472225154	9.00E-16	4.94E-15	yes	up	ref_gene	mRNA
FORC47_RS09900	FORC47_RS09900	IucA/IucC family siderophore biosynthesis protein	2.259	1.175791512	1.18E-15	6.47E-15	yes	up	ref_gene	mRNA
FORC47_RS20160	murG	undecaprenyldiphospho-muramoylpentapeptide beta-N-acetylglucosaminyltransferase	3.533	1.820875005	1.19E-15	6.53E-15	yes	up	ref_gene	mRNA
FORC47_RS26745	FORC47_RS26745	DegV family protein	2.739	1.453443543	1.43E-15	7.82E-15	yes	up	ref_gene	mRNA
FORC47_RS07555	FORC47_RS07555	ATP-binding protein	2.451	1.293083897	1.51E-15	8.26E-15	yes	up	ref_gene	mRNA
FORC47_RS23165	gerE	spore germination transcription factor GerE	12.161	3.604196235	1.59E-15	8.67E-15	yes	up	ref_gene	mRNA
FORC47_RS08760	FORC47_RS08760	serine hydrolase	2.033	1.02340941	2.27E-15	1.23E-14	yes	up	ref_gene	mRNA
FORC47_RS05220	FORC47_RS05220	protein-glutamate O-methyltransferase CheR	4.465	2.158636791	3.22E-15	1.74E-14	yes	up	ref_gene	mRNA
FORC47_RS02200	FORC47_RS02200	YhgE/Pip domain-containing protein	2.402	1.263979796	3.59E-15	1.94E-14	yes	up	ref_gene	mRNA
FORC47_RS04525	FORC47_RS04525	ABC transporter transmembrane domain-containing protein	2.475	1.307269924	5.87E-15	3.17E-14	yes	up	ref_gene	mRNA
FORC47_RS02380	FORC47_RS02380	DUF1128 domain-containing protein	4.568	2.191665591	9.57E-15	5.15E-14	yes	up	ref_gene	mRNA
FORC47_RS23130	FORC47_RS23130	ribonuclease PH	2.432	1.28226814	9.85E-15	5.29E-14	yes	up	ref_gene	mRNA
FORC47_RS08475	cheR	protein-glutamate O-methyltransferase CheR	2.186	1.128287254	1.62E-14	8.70E-14	yes	up	ref_gene	mRNA
FORC47_RS00225	rsmI	16S rRNA (cytidine(1402)-2'-O)-methyltransferase	3.687	1.882408168	1.72E-14	9.18E-14	yes	up	ref_gene	mRNA
FORC47_RS28335	spoIIIJ	YidC family membrane integrase SpoIIIJ	3.966	1.987524874	1.72E-14	9.19E-14	yes	up	ref_gene	mRNA
FORC47_RS05940	FORC47_RS05940	ammonium transporter	4.089	2.031724678	2.01E-14	1.07E-13	yes	up	ref_gene	mRNA
FORC47_RS22300	hemW	radical SAM family heme chaperone HemW	2.943	1.557447976	2.19E-14	1.17E-13	yes	up	ref_gene	mRNA
FORC47_RS24490	FORC47_RS24490	class I SAM-dependent methyltransferase	5.816	2.540065897	2.39E-14	1.27E-13	yes	up	ref_gene	mRNA
FORC47_RS08675	FORC47_RS08675	AzlC family ABC transporter permease	3.365	1.750485677	2.91E-14	1.54E-13	yes	up	ref_gene	mRNA
FORC47_RS00210	yabA	DNA replication initiation control protein YabA	2.115	1.080634279	3.30E-14	1.74E-13	yes	up	ref_gene	mRNA
FORC47_RS14970	FORC47_RS14970	multidrug resistance efflux transporter family protein	2.63	1.395144902	3.31E-14	1.75E-13	yes	up	ref_gene	mRNA
FORC47_RS25525	FORC47_RS25525	YxeA family protein	15.334	3.938615274	4.87E-14	2.56E-13	yes	up	ref_gene	mRNA
FORC47_RS23565	dnaI	primosomal protein DnaI	2.334	1.223078544	5.29E-14	2.78E-13	yes	up	ref_gene	mRNA
FORC47_RS23260	FORC47_RS23260	YslB family protein	3.172	1.665596779	5.39E-14	2.82E-13	yes	up	ref_gene	mRNA
FORC47_RS16960	FORC47_RS16960	cytoplasmic protein	2.445	1.289668317	5.56E-14	2.91E-13	yes	up	ref_gene	mRNA
FORC47_RS00845	truA	tRNA pseudouridine(38-40) synthase TruA	3.763	1.912034675	6.06E-14	3.17E-13	yes	up	ref_gene	mRNA
FORC47_RS11060	FORC47_RS11060	MurR/RpiR family transcriptional regulator	2.412	1.270458838	6.40E-14	3.34E-13	yes	up	ref_gene	mRNA
FORC47_RS15775	FORC47_RS15775	DUF969 domain-containing protein	2.848	1.510142261	8.16E-14	4.24E-13	yes	up	ref_gene	mRNA
FORC47_RS05295	FORC47_RS05295	AAA family ATPase	2.559	1.35549412	8.72E-14	4.53E-13	yes	up	ref_gene	mRNA
FORC47_RS23940	FORC47_RS23940	cysteine desulfurase	2.965	1.567900105	9.86E-14	5.11E-13	yes	up	ref_gene	mRNA
FORC47_RS04625	FORC47_RS04625	coproporphyrinogen III oxidase	2.541	1.345134093	1.05E-13	5.45E-13	yes	up	ref_gene	mRNA
FORC47_RS24980	FORC47_RS24980	ABC transporter permease	3.833	1.938615274	1.19E-13	6.14E-13	yes	up	ref_gene	mRNA
FORC47_RS22370	yqeK	bis(5'-nucleosyl)-tetraphosphatase (symmetrical) YqeK	3.437	1.781073997	1.22E-13	6.31E-13	yes	up	ref_gene	mRNA
FORC47_RS18125	FORC47_RS18125	GNAT family N-acetyltransferase	2.831	1.5014774	1.23E-13	6.33E-13	yes	up	ref_gene	mRNA
FORC47_RS30525	FORC47_RS30525	S-layer homology domain-containing protein	2.407	1.267512413	1.36E-13	7.01E-13	yes	up	ref_gene	mRNA
FORC47_RS04640	FORC47_RS04640	hypothetical protein	4.011	2.004012997	1.55E-13	7.94E-13	yes	up	ref_gene	mRNA
FORC47_RS10820	FORC47_RS10820	nucleotidyltransferase family protein	2.766	1.467657402	1.62E-13	8.32E-13	yes	up	ref_gene	mRNA
FORC47_RS22575	FORC47_RS22575	O-acetylserine dependent cystathionine beta-synthase	3.195	1.676013395	2.03E-13	1.04E-12	yes	up	ref_gene	mRNA
FORC47_RS22620	FORC47_RS22620	U32 family peptidase	4.406	2.139527968	2.12E-13	1.08E-12	yes	up	ref_gene	mRNA
FORC47_RS01250	FORC47_RS01250	hypothetical protein	5.552	2.472951701	2.13E-13	1.09E-12	yes	up	ref_gene	mRNA
FORC47_RS16380	FORC47_RS16380	D-cysteine desulfhydrase	2.644	1.402562374	2.20E-13	1.12E-12	yes	up	ref_gene	mRNA
FORC47_RS12715	FORC47_RS12715	HAMP domain-containing histidine kinase	3.353	1.745450087	2.65E-13	1.35E-12	yes	up	ref_gene	mRNA
FORC47_RS01730	purC	phosphoribosylaminoimidazolesuccinocarboxamide synthase	2.85	1.510874185	3.12E-13	1.58E-12	yes	up	ref_gene	mRNA
FORC47_RS24225	trmB	tRNA (guanosine(46)-N7)-methyltransferase TrmB	3.821	1.93379289	3.41E-13	1.73E-12	yes	up	ref_gene	mRNA
FORC47_RS15425	FORC47_RS15425	DUF4018 domain-containing protein	2.699	1.432397603	3.73E-13	1.89E-12	yes	up	ref_gene	mRNA
FORC47_RS25145	glgD	glucose-1-phosphate adenylyltransferase subunit GlgD	3.127	1.6449865	4.17E-13	2.10E-12	yes	up	ref_gene	mRNA
FORC47_RS00325	mazG	nucleoside triphosphate pyrophosphohydrolase	2.344	1.228914286	4.50E-13	2.26E-12	yes	up	ref_gene	mRNA
FORC47_RS26980	FORC47_RS26980	glycosyltransferase family 2 protein	3.149	1.655104406	4.86E-13	2.44E-12	yes	up	ref_gene	mRNA
FORC47_RS02875	trmL	tRNA (uridine(34)/cytosine(34)/5-carboxymethylaminomethyluridine(34)-2'-O)-methyltransferase TrmL	2.018	1.013070995	5.19E-13	2.60E-12	yes	up	ref_gene	mRNA
FORC47_RS09850	thrB	homoserine kinase	2.077	1.054450347	5.40E-13	2.71E-12	yes	up	ref_gene	mRNA
FORC47_RS28045	FORC47_RS28045	ATP-binding cassette domain-containing protein	2.063	1.044629325	5.52E-13	2.76E-12	yes	up	ref_gene	mRNA
FORC47_RS22395	FORC47_RS22395	YqeG family HAD IIIA-type phosphatase	2.986	1.578133938	7.96E-13	3.97E-12	yes	up	ref_gene	mRNA
FORC47_RS06970	queE	7-carboxy-7-deazaguanine synthase QueE	3.496	1.805527041	8.02E-13	4.00E-12	yes	up	ref_gene	mRNA
FORC47_RS07115	FORC47_RS07115	teichoic acid D-Ala incorporation-associated protein DltX	2.245	1.166495015	1.19E-12	5.90E-12	yes	up	ref_gene	mRNA
FORC47_RS19805	rimM	ribosome maturation factor RimM	4.186	2.065527386	2.62E-12	1.28E-11	yes	up	ref_gene	mRNA
FORC47_RS08265	FORC47_RS08265	DUF6123 family protein	2.32	1.21390081	2.87E-12	1.40E-11	yes	up	ref_gene	mRNA
FORC47_RS18635	FORC47_RS18635	long-chain fatty acid--CoA ligase	2.045	1.032090427	3.45E-12	1.69E-11	yes	up	ref_gene	mRNA
FORC47_RS26625	FORC47_RS26625	YeiH family protein	2.278	1.188080569	3.66E-12	1.79E-11	yes	up	ref_gene	mRNA
FORC47_RS16585	FORC47_RS16585	hypothetical protein	2.293	1.197279197	3.86E-12	1.88E-11	yes	up	ref_gene	mRNA
FORC47_RS23530	FORC47_RS23530	dUTP diphosphatase	2.133	1.092808993	4.06E-12	1.98E-11	yes	up	ref_gene	mRNA
FORC47_RS22375	nadD	nicotinate-nucleotide adenylyltransferase	3.055	1.611148995	4.93E-12	2.40E-11	yes	up	ref_gene	mRNA
FORC47_RS09530	topB	DNA topoisomerase III	2.004	1.002911983	5.27E-12	2.56E-11	yes	up	ref_gene	mRNA
FORC47_RS16060	FORC47_RS16060	NADH dehydrogenase subunit 5	5.358	2.421671196	5.27E-12	2.56E-11	yes	up	ref_gene	mRNA
FORC47_RS17660	FORC47_RS17660	ArsB/NhaD family transporter	2.282	1.19025877	5.46E-12	2.65E-11	yes	up	ref_gene	mRNA
FORC47_RS16975	FORC47_RS16975	tyrosine-protein phosphatase	2.089	1.062932277	7.31E-12	3.52E-11	yes	up	ref_gene	mRNA
FORC47_RS07665	FORC47_RS07665	hypothetical protein	2.746	1.45719763	7.58E-12	3.65E-11	yes	up	ref_gene	mRNA
FORC47_RS23570	FORC47_RS23570	DnaD domain protein	2.244	1.166364153	8.37E-12	4.02E-11	yes	up	ref_gene	mRNA
FORC47_RS27700	FORC47_RS27700	DUF1934 domain-containing protein	5.514	2.463103915	8.66E-12	4.16E-11	yes	up	ref_gene	mRNA
FORC47_RS25485	FORC47_RS25485	NUDIX domain-containing protein	2.073	1.051487933	9.17E-12	4.39E-11	yes	up	ref_gene	mRNA
FORC47_RS17310	FORC47_RS17310	BA3454 family stress response protein	3.582	1.840683486	9.38E-12	4.49E-11	yes	up	ref_gene	mRNA
FORC47_RS14285	FORC47_RS14285	glycosyl transferase family 1	3.074	1.620153809	1.04E-11	4.98E-11	yes	up	ref_gene	mRNA
FORC47_RS01390	alr	alanine racemase	4.054	2.019233734	1.16E-11	5.52E-11	yes	up	ref_gene	mRNA
FORC47_RS19935	def	peptide deformylase	2.876	1.52424093	1.16E-11	5.51E-11	yes	up	ref_gene	mRNA
FORC47_RS21175	FORC47_RS21175	Na+/H+ antiporter family protein	3.2	1.677875109	1.25E-11	5.92E-11	yes	up	ref_gene	mRNA
FORC47_RS18605	FORC47_RS18605	DHHA1 domain-containing protein	2.373	1.24664423	1.26E-11	5.98E-11	yes	up	ref_gene	mRNA
FORC47_RS20900	FORC47_RS20900	Cof-type HAD-IIB family hydrolase	2.541	1.345461966	1.79E-11	8.47E-11	yes	up	ref_gene	mRNA
FORC47_RS02480	FORC47_RS02480	DNA-3-methyladenine glycosylase	2.467	1.3030267	2.10E-11	9.90E-11	yes	up	ref_gene	mRNA
FORC47_RS18860	FORC47_RS18860	hypothetical protein	3.701	1.887989201	2.10E-11	9.91E-11	yes	up	ref_gene	mRNA
FORC47_RS07840	hepT	heptaprenyl diphosphate synthase component II	2.088	1.0620186	2.46E-11	1.16E-10	yes	up	ref_gene	mRNA
FORC47_RS28155	FORC47_RS28155	DEAD/DEAH box helicase	2.961	1.566061106	2.70E-11	1.27E-10	yes	up	ref_gene	mRNA
FORC47_RS27515	FORC47_RS27515	thymidine kinase	2.753	1.461238281	3.48E-11	1.63E-10	yes	up	ref_gene	mRNA
FORC47_RS08015	nth	endonuclease III	2.334	1.222928161	3.66E-11	1.71E-10	yes	up	ref_gene	mRNA
FORC47_RS04645	FORC47_RS04645	SulP family inorganic anion transporter	2.353	1.234439615	3.83E-11	1.78E-10	yes	up	ref_gene	mRNA
FORC47_RS22610	udk	uridine kinase	2.373	1.246443172	3.98E-11	1.85E-10	yes	up	ref_gene	mRNA
FORC47_RS20505	FORC47_RS20505	DNA-dependent RNA polymerase subunit epsilon	2.079	1.055543298	4.14E-11	1.93E-10	yes	up	ref_gene	mRNA
FORC47_RS23370	FORC47_RS23370	class I SAM-dependent rRNA methyltransferase	3.118	1.640722111	4.63E-11	2.15E-10	yes	up	ref_gene	mRNA
FORC47_RS23195	FORC47_RS23195	aquaporin	6.451	2.689443521	5.67E-11	2.63E-10	yes	up	ref_gene	mRNA
FORC47_RS11285	FORC47_RS11285	cation diffusion facilitator family transporter	2.146	1.101695894	7.50E-11	3.45E-10	yes	up	ref_gene	mRNA
FORC47_RS00635	FORC47_RS00635	class I SAM-dependent methyltransferase	4.825	2.270458838	7.67E-11	3.53E-10	yes	up	ref_gene	mRNA
FORC47_RS12595	FORC47_RS12595	hypothetical protein	5.96	2.57539897	1.10E-10	5.05E-10	yes	up	ref_gene	mRNA
FORC47_RS01385	FORC47_RS01385	outer membrane lipoprotein carrier protein LolA	2.352	1.233586201	1.21E-10	5.53E-10	yes	up	ref_gene	mRNA
FORC47_RS15075	tyrA	prephenate dehydrogenase	2.158	1.109780624	1.22E-10	5.55E-10	yes	up	ref_gene	mRNA
FORC47_RS05015	FORC47_RS05015	YmzC family protein	2.095	1.067087747	1.36E-10	6.21E-10	yes	up	ref_gene	mRNA
FORC47_RS24675	FORC47_RS24675	ABC transporter permease	3.235	1.693611156	1.53E-10	6.95E-10	yes	up	ref_gene	mRNA
FORC47_RS29005	scfA	six-cysteine ranthipeptide SCIFF	3.603	1.849308733	1.55E-10	7.05E-10	yes	up	ref_gene	mRNA
FORC47_RS21170	FORC47_RS21170	alpha/beta hydrolase	2.426	1.278573656	2.00E-10	9.07E-10	yes	up	ref_gene	mRNA
FORC47_RS28290	FORC47_RS28290	mechanosensitive ion channel family protein	2.451	1.293628002	2.05E-10	9.29E-10	yes	up	ref_gene	mRNA
FORC47_RS03650	FORC47_RS03650	NCS2 family permease	2.184	1.126927931	2.12E-10	9.57E-10	yes	up	ref_gene	mRNA
FORC47_RS22460	FORC47_RS22460	DoxX family protein	2.606	1.381803813	2.14E-10	9.63E-10	yes	up	ref_gene	mRNA
FORC47_RS09910	FORC47_RS09910	AMP-binding protein	3.789	1.921936533	2.15E-10	9.67E-10	yes	up	ref_gene	mRNA
FORC47_RS09790	FORC47_RS09790	ABC transporter ATP-binding protein/permease	2.431	1.281331629	2.44E-10	1.10E-09	yes	up	ref_gene	mRNA
FORC47_RS10140	FORC47_RS10140	methylated-DNA--[protein]-cysteine S-methyltransferase	2.805	1.48780966	2.74E-10	1.23E-09	yes	up	ref_gene	mRNA
FORC47_RS24260	FORC47_RS24260	rRNA pseudouridine synthase	6.133	2.616687179	3.07E-10	1.37E-09	yes	up	ref_gene	mRNA
FORC47_RS28955	FORC47_RS28955	hypothetical protein	2.82	1.495671778	3.27E-10	1.46E-09	yes	up	ref_gene	mRNA
FORC47_RS24825	FORC47_RS24825	ATP-binding protein	4.347	2.120162643	3.41E-10	1.52E-09	yes	up	ref_gene	mRNA
FORC47_RS03125	FORC47_RS03125	metalloregulator ArsR/SmtB family transcription factor	3.745	1.905062714	3.46E-10	1.54E-09	yes	up	ref_gene	mRNA
FORC47_RS11560	FORC47_RS11560	DinB family protein	2.094	1.066278986	4.61E-10	2.05E-09	yes	up	ref_gene	mRNA
FORC47_RS06850	FORC47_RS06850	TrkH family potassium uptake protein	2.174	1.120600686	5.44E-10	2.41E-09	yes	up	ref_gene	mRNA
FORC47_RS14890	FORC47_RS14890	YrzI family small protein	2.479	1.309768278	5.46E-10	2.42E-09	yes	up	ref_gene	mRNA
FORC47_RS08030	recU	Holliday junction resolvase RecU	2.379	1.25055928	5.96E-10	2.63E-09	yes	up	ref_gene	mRNA
FORC47_RS09425	FORC47_RS09425	heavy metal-binding domain-containing protein	6.865	2.779271754	7.50E-10	3.31E-09	yes	up	ref_gene	mRNA
FORC47_RS25700	glpX	class II fructose-bisphosphatase	2.138	1.096231134	7.92E-10	3.49E-09	yes	up	ref_gene	mRNA
FORC47_RS01560	FORC47_RS01560	NCS2 family permease	2.594	1.375081637	8.17E-10	3.60E-09	yes	up	ref_gene	mRNA
FORC47_RS01950	FORC47_RS01950	tRNA-dihydrouridine synthase	3.241	1.696293577	9.02E-10	3.97E-09	yes	up	ref_gene	mRNA
FORC47_RS24760	FORC47_RS24760	YdcF family protein	35.954	5.16809712	9.49E-10	4.17E-09	yes	up	ref_gene	mRNA
FORC47_RS08880	nhaC	Na+/H+ antiporter NhaC	2.53	1.339368547	9.89E-10	4.35E-09	yes	up	ref_gene	mRNA
FORC47_RS19110	hflX	GTPase HflX	3.026	1.597209804	9.96E-10	4.37E-09	yes	up	ref_gene	mRNA
FORC47_RS13370	FORC47_RS13370	DUF1835 domain-containing protein	3.14	1.650950003	1.04E-09	4.56E-09	yes	up	ref_gene	mRNA
FORC47_RS19905	rsgA	ribosome small subunit-dependent GTPase A	2.4	1.263225692	1.61E-09	7.00E-09	yes	up	ref_gene	mRNA
FORC47_RS27035	FORC47_RS27035	VanZ family protein	3.678	1.879000417	1.61E-09	7.01E-09	yes	up	ref_gene	mRNA
FORC47_RS00215	FORC47_RS00215	tRNA1(Val) (adenine(37)-N6)-methyltransferase	2.855	1.513593686	1.79E-09	7.79E-09	yes	up	ref_gene	mRNA
FORC47_RS22220	ybeY	rRNA maturation RNase YbeY	2.024	1.017440452	1.83E-09	7.97E-09	yes	up	ref_gene	mRNA
FORC47_RS06350	FORC47_RS06350	Ig-like domain-containing protein	4.962	2.310931898	1.84E-09	7.96E-09	yes	up	ref_gene	mRNA
FORC47_RS25810	metQ	methionine ABC transporter substrate-binding lipoprotein MetQ	2.493	1.317673476	2.10E-09	9.11E-09	yes	up	ref_gene	mRNA
FORC47_RS06170	FORC47_RS06170	hypothetical protein	2.562	1.357474484	2.14E-09	9.24E-09	yes	up	ref_gene	mRNA
FORC47_RS27930	FORC47_RS27930	FMN-dependent NADH-azoreductase	9.094	3.184970938	2.25E-09	9.71E-09	yes	up	ref_gene	mRNA
FORC47_RS14135	FORC47_RS14135	GNAT family N-acetyltransferase	2.811	1.491266599	2.27E-09	9.79E-09	yes	up	ref_gene	mRNA
FORC47_RS19405	FORC47_RS19405	LysM peptidoglycan-binding domain-containing protein	2.115	1.080634279	2.28E-09	9.82E-09	yes	up	ref_gene	mRNA
FORC47_RS20280	FORC47_RS20280	histidine phosphatase family protein	2.894	1.533146483	2.54E-09	1.09E-08	yes	up	ref_gene	mRNA
FORC47_RS07830	FORC47_RS07830	heptaprenyl diphosphate synthase component 1	2.153	1.106169371	2.91E-09	1.25E-08	yes	up	ref_gene	mRNA
FORC47_RS22195	recO	DNA repair protein RecO	2.021	1.014879833	4.13E-09	1.77E-08	yes	up	ref_gene	mRNA
FORC47_RS24965	FORC47_RS24965	response regulator transcription factor	2.03	1.021133267	4.56E-09	1.95E-08	yes	up	ref_gene	mRNA
FORC47_RS09245	ilvB	acetolactate synthase large subunit	5.992	2.583134619	4.59E-09	1.96E-08	yes	up	ref_gene	mRNA
FORC47_RS25705	FORC47_RS25705	DUF3055 domain-containing protein	3.104	1.634232608	5.26E-09	2.24E-08	yes	up	ref_gene	mRNA
FORC47_RS00270	ispE	4-(cytidine 5'-diphospho)-2-C-methyl-D-erythritol kinase	2.494	1.318498109	5.50E-09	2.34E-08	yes	up	ref_gene	mRNA
FORC47_RS26750	FORC47_RS26750	YigZ family protein	2.568	1.360742198	5.57E-09	2.37E-08	yes	up	ref_gene	mRNA
FORC47_RS06960	queC	7-cyano-7-deazaguanine synthase QueC	2.029	1.020513286	5.59E-09	2.37E-08	yes	up	ref_gene	mRNA
FORC47_RS27310	FORC47_RS27310	NADH-quinone oxidoreductase subunit M	2.407	1.267047403	6.24E-09	2.64E-08	yes	up	ref_gene	mRNA
FORC47_RS22730	hisS	histidine--tRNA ligase	2.115	1.080634279	6.31E-09	2.67E-08	yes	up	ref_gene	mRNA
FORC47_RS13960	FORC47_RS13960	5'-nucleotidase C-terminal domain-containing protein	2.931	1.551264104	6.44E-09	2.72E-08	yes	up	ref_gene	mRNA
FORC47_RS07250	ilvB	acetolactate synthase large subunit	8.671	3.116258188	7.45E-09	3.14E-08	yes	up	ref_gene	mRNA
FORC47_RS18110	FORC47_RS18110	HAMP domain-containing histidine kinase	5.875	2.554565467	8.03E-09	3.37E-08	yes	up	ref_gene	mRNA
FORC47_RS01220	FORC47_RS01220	YxeA family protein	3.07	1.618291065	8.13E-09	3.41E-08	yes	up	ref_gene	mRNA
FORC47_RS10865	FORC47_RS10865	helix-turn-helix transcriptional regulator	2.337	1.224470051	8.28E-09	3.47E-08	yes	up	ref_gene	mRNA
FORC47_RS12275	FORC47_RS12275	alanine:cation symporter family protein	7.579	2.921936533	9.42E-09	3.94E-08	yes	up	ref_gene	mRNA
FORC47_RS01360	murF	UDP-N-acetylmuramoyl-tripeptide--D-alanyl-D-alanine ligase	2.275	1.185987279	1.06E-08	4.43E-08	yes	up	ref_gene	mRNA
FORC47_RS16235	FORC47_RS16235	serine hydrolase	2.204	1.140129216	1.22E-08	5.08E-08	yes	up	ref_gene	mRNA
FORC47_RS05630	FORC47_RS05630	TetR/AcrR family transcriptional regulator	4.043	2.01553925	1.22E-08	5.09E-08	yes	up	ref_gene	mRNA
FORC47_RS10650	FORC47_RS10650	DUF58 domain-containing protein	2.849	1.510622119	1.25E-08	5.20E-08	yes	up	ref_gene	mRNA
FORC47_RS02540	glsA	glutaminase A	3.067	1.616687179	1.47E-08	6.10E-08	yes	up	ref_gene	mRNA
FORC47_RS20925	scpB	segregation/condensation protein ScpB	3.067	1.616687179	1.47E-08	6.10E-08	yes	up	ref_gene	mRNA
FORC47_RS09925	FORC47_RS09925	sugar phosphate isomerase/epimerase	5.393	2.431131526	1.48E-08	6.13E-08	yes	up	ref_gene	mRNA
FORC47_RS02645	FORC47_RS02645	YfhJ family protein	3.785	1.920169606	1.67E-08	6.88E-08	yes	up	ref_gene	mRNA
FORC47_RS20275	FORC47_RS20275	YlbF family regulator	2.034	1.02405075	1.71E-08	7.04E-08	yes	up	ref_gene	mRNA
FORC47_RS06975	queF	preQ(1) synthase	2.115	1.080634279	1.75E-08	7.23E-08	yes	up	ref_gene	mRNA
FORC47_RS29155	bla	class A beta-lactamase	4.426	2.146108116	1.80E-08	7.40E-08	yes	up	ref_gene	mRNA
FORC47_RS16575	FORC47_RS16575	DUF378 domain-containing protein	9.782	3.290087644	1.85E-08	7.61E-08	yes	up	ref_gene	mRNA
FORC47_RS28195	FORC47_RS28195	MBL fold metallo-hydrolase	2.066	1.046686947	1.85E-08	7.61E-08	yes	up	ref_gene	mRNA
FORC47_RS07245	ilvE	branched-chain-amino-acid transaminase	2.916	1.544034799	2.10E-08	8.60E-08	yes	up	ref_gene	mRNA
FORC47_RS20725	FORC47_RS20725	RDD family protein	4.381	2.131260352	2.44E-08	9.98E-08	yes	up	ref_gene	mRNA
FORC47_RS09840	FORC47_RS09840	homoserine dehydrogenase	2.657	1.409582801	2.54E-08	1.04E-07	yes	up	ref_gene	mRNA
FORC47_RS20630	FORC47_RS20630	MFS transporter	4.999	2.321642378	2.61E-08	1.06E-07	yes	up	ref_gene	mRNA
FORC47_RS21745	FORC47_RS21745	DNA polymerase III subunit delta	7.226	2.853223783	3.03E-08	1.23E-07	yes	up	ref_gene	mRNA
FORC47_RS01955	FORC47_RS01955	DUF1456 family protein	5.948	2.572487375	3.95E-08	1.59E-07	yes	up	ref_gene	mRNA
FORC47_RS09255	ilvC	ketol-acid reductoisomerase	11.632	3.540065897	4.40E-08	1.76E-07	yes	up	ref_gene	mRNA
FORC47_RS09360	FORC47_RS09360	rhodanese-related sulfurtransferase	2.029	1.020691738	4.73E-08	1.90E-07	yes	up	ref_gene	mRNA
FORC47_RS13905	FORC47_RS13905	response regulator transcription factor	15.862	3.987524874	5.31E-08	2.13E-07	yes	up	ref_gene	mRNA
FORC47_RS11065	FORC47_RS11065	PhzF family phenazine biosynthesis protein	2.017	1.011921529	6.44E-08	2.57E-07	yes	up	ref_gene	mRNA
FORC47_RS17950	FORC47_RS17950	Fic family protein	3.021	1.595207451	7.45E-08	2.96E-07	yes	up	ref_gene	mRNA
FORC47_RS23090	FORC47_RS23090	PH domain-containing protein	2.452	1.294229752	7.97E-08	3.16E-07	yes	up	ref_gene	mRNA
FORC47_RS08510	FORC47_RS08510	flagellar protein FliS	2.236	1.161124197	8.27E-08	3.27E-07	yes	up	ref_gene	mRNA
FORC47_RS28005	FORC47_RS28005	glycosyltransferase family 39 protein	3.794	1.923908775	8.69E-08	3.44E-07	yes	up	ref_gene	mRNA
FORC47_RS08710	FORC47_RS08710	H-type small acid-soluble spore protein	3.794	1.923908775	8.69E-08	3.44E-07	yes	up	ref_gene	mRNA
FORC47_RS00570	cysE	serine O-acetyltransferase	2.768	1.468904868	9.25E-08	3.65E-07	yes	up	ref_gene	mRNA
FORC47_RS00190	FORC47_RS00190	aminotransferase class I/II-fold pyridoxal phosphate-dependent enzyme	2.217	1.148805781	9.49E-08	3.74E-07	yes	up	ref_gene	mRNA
FORC47_RS27300	FORC47_RS27300	DUF1146 family protein	2.543	1.346528339	9.97E-08	3.93E-07	yes	up	ref_gene	mRNA
FORC47_RS09670	FORC47_RS09670	LysR family transcriptional regulator	2.025	1.017703023	1.07E-07	4.21E-07	yes	up	ref_gene	mRNA
FORC47_RS24985	FORC47_RS24985	ABC transporter ATP-binding protein	3.13	1.646231455	1.21E-07	4.71E-07	yes	up	ref_gene	mRNA
FORC47_RS09760	FORC47_RS09760	LD-carboxypeptidase	2.1	1.070580614	1.25E-07	4.87E-07	yes	up	ref_gene	mRNA
FORC47_RS15670	FORC47_RS15670	GNAT family N-acetyltransferase	2.164	1.113548901	1.41E-07	5.51E-07	yes	up	ref_gene	mRNA
FORC47_RS28025	FORC47_RS28025	glycosyltransferase	3.05	1.609013251	1.59E-07	6.19E-07	yes	up	ref_gene	mRNA
FORC47_RS09040	malS	oxaloacetate-decarboxylating malate dehydrogenase	2.266	1.180169952	1.62E-07	6.30E-07	yes	up	ref_gene	mRNA
FORC47_RS04345	FORC47_RS04345	hypothetical protein	2.059	1.041640147	1.75E-07	6.80E-07	yes	up	ref_gene	mRNA
FORC47_RS14540	FORC47_RS14540	GNAT family N-acetyltransferase	14.805	3.887989201	1.85E-07	7.15E-07	yes	up	ref_gene	mRNA
FORC47_RS02490	truA	tRNA pseudouridine(38-40) synthase TruA	6.043	2.595207451	1.95E-07	7.53E-07	yes	up	ref_gene	mRNA
FORC47_RS17620	FORC47_RS17620	multidrug effflux MFS transporter	2.295	1.198203875	2.10E-07	8.10E-07	yes	up	ref_gene	mRNA
FORC47_RS08540	fliG	flagellar motor switch protein FliG	2.644	1.402562374	2.13E-07	8.21E-07	yes	up	ref_gene	mRNA
FORC47_RS14610	FORC47_RS14610	HAMP domain-containing histidine kinase	2.797	1.483989973	2.40E-07	9.21E-07	yes	up	ref_gene	mRNA
FORC47_RS12570	FORC47_RS12570	penicillin-binding protein 2	5.461	2.4490595	2.78E-07	1.06E-06	yes	up	ref_gene	mRNA
FORC47_RS07510	FORC47_RS07510	Crp/Fnr family transcriptional regulator	3.877	1.955103397	2.80E-07	1.07E-06	yes	up	ref_gene	mRNA
FORC47_RS00240	FORC47_RS00240	TatD family hydrolase	2.019	1.013520083	2.98E-07	1.13E-06	yes	up	ref_gene	mRNA
FORC47_RS08270	FORC47_RS08270	DMT family transporter	2.084	1.059572663	3.18E-07	1.21E-06	yes	up	ref_gene	mRNA
FORC47_RS10200	FORC47_RS10200	permease	14.276	3.835521781	3.45E-07	1.31E-06	yes	up	ref_gene	mRNA
FORC47_RS24840	FORC47_RS24840	LPXTG cell wall anchor domain-containing protein	4.318	2.110381622	3.50E-07	1.33E-06	yes	up	ref_gene	mRNA
FORC47_RS17570	FORC47_RS17570	serine hydrolase	2.763	1.466287971	3.61E-07	1.37E-06	yes	up	ref_gene	mRNA
FORC47_RS03590	FORC47_RS03590	undecaprenyl-diphosphate phosphatase	4.518	2.175791512	3.65E-07	1.38E-06	yes	up	ref_gene	mRNA
FORC47_RS19655	FORC47_RS19655	DUF503 family protein	3.608	1.851152433	3.67E-07	1.39E-06	yes	up	ref_gene	mRNA
FORC47_RS23365	FORC47_RS23365	YwbE family protein	4.759	2.25055928	3.75E-07	1.41E-06	yes	up	ref_gene	mRNA
FORC47_RS30825	FORC47_RS30825	hypothetical protein	5.052	2.336974032	3.75E-07	1.41E-06	yes	up	ref_gene	mRNA
FORC47_RS21705	FORC47_RS21705	HAD family hydrolase	2.23	1.15725556	3.97E-07	1.49E-06	yes	up	ref_gene	mRNA
FORC47_RS27855	FORC47_RS27855	purine/pyrimidine permease	2.005	1.003672297	4.05E-07	1.52E-06	yes	up	ref_gene	mRNA
FORC47_RS09830	FORC47_RS09830	NUDIX domain-containing protein	3.223	1.688316856	5.41E-07	2.03E-06	yes	up	ref_gene	mRNA
FORC47_RS12870	FORC47_RS12870	4-hydroxyphenylacetate 3-hydroxylase	2.45	1.292937882	5.52E-07	2.07E-06	yes	up	ref_gene	mRNA
FORC47_RS07900	FORC47_RS07900	TIGR01906 family membrane protein	2.677	1.420484282	6.74E-07	2.50E-06	yes	up	ref_gene	mRNA
FORC47_RS07995	FORC47_RS07995	YpmA family protein	2.961	1.566061106	6.85E-07	2.54E-06	yes	up	ref_gene	mRNA
FORC47_RS24280	FORC47_RS24280	MFS transporter	2.317	1.212545954	7.11E-07	2.63E-06	yes	up	ref_gene	mRNA
FORC47_RS22675	FORC47_RS22675	hypothetical protein	2.171	1.118108984	7.30E-07	2.69E-06	yes	up	ref_gene	mRNA
FORC47_RS14810	FORC47_RS14810	beta-hydroxyacyl-ACP dehydratase	6.979	2.803100303	8.44E-07	3.11E-06	yes	up	ref_gene	mRNA
FORC47_RS15650	FORC47_RS15650	metallophosphatase family protein	3.986	1.994904405	8.97E-07	3.30E-06	yes	up	ref_gene	mRNA
FORC47_RS22365	rsfS	ribosome silencing factor	2.392	1.258172464	9.48E-07	3.49E-06	yes	up	ref_gene	mRNA
FORC47_RS26100	FORC47_RS26100	DUF3920 family protein	9.87	3.3030267	9.48E-07	3.49E-06	yes	up	ref_gene	mRNA
FORC47_RS06650	FORC47_RS06650	CalY family protein	3.225	1.689443521	9.84E-07	3.61E-06	yes	up	ref_gene	mRNA
FORC47_RS04935	FORC47_RS04935	TetR/AcrR family transcriptional regulator	2.526	1.336974032	1.01E-06	3.72E-06	yes	up	ref_gene	mRNA
FORC47_RS02320	proS	proline--tRNA ligase	2.526	1.336974032	1.01E-06	3.72E-06	yes	up	ref_gene	mRNA
FORC47_RS18225	panF	sodium/pantothenate symporter	2.361	1.239332025	1.12E-06	4.09E-06	yes	up	ref_gene	mRNA
FORC47_RS16455	FORC47_RS16455	YitT family protein	2.195	1.134073538	1.19E-06	4.34E-06	yes	up	ref_gene	mRNA
FORC47_RS22885	FORC47_RS22885	ABC transporter permease	2.098	1.068760178	1.20E-06	4.37E-06	yes	up	ref_gene	mRNA
FORC47_RS12530	FORC47_RS12530	aromatic ring-hydroxylating dioxygenase subunit alpha	2.465	1.301661158	1.27E-06	4.63E-06	yes	up	ref_gene	mRNA
FORC47_RS07175	uppP	bacitracin resistance undecaprenyl-diphosphatase	2.244	1.166364153	1.36E-06	4.94E-06	yes	up	ref_gene	mRNA
FORC47_RS03705	FORC47_RS03705	C39 family peptidase	2.679	1.421671196	1.47E-06	5.30E-06	yes	up	ref_gene	mRNA
FORC47_RS16305	FORC47_RS16305	hybrid sensor histidine kinase/response regulator transcription factor	2.221	1.151023607	1.56E-06	5.65E-06	yes	up	ref_gene	mRNA
FORC47_RS03240	FORC47_RS03240	class I SAM-dependent methyltransferase	2.373	1.24664423	1.67E-06	6.04E-06	yes	up	ref_gene	mRNA
FORC47_RS01170	FORC47_RS01170	LysR family transcriptional regulator	2.908	1.540065897	1.91E-06	6.87E-06	yes	up	ref_gene	mRNA
FORC47_RS18950	FORC47_RS18950	hypothetical protein	2.806	1.488719017	2.04E-06	7.31E-06	yes	up	ref_gene	mRNA
FORC47_RS03920	FORC47_RS03920	hypothetical protein	2.519	1.33302144	2.20E-06	7.88E-06	yes	up	ref_gene	mRNA
FORC47_RS09920	FORC47_RS09920	DUF6005 family protein	5.816	2.540065897	3.00E-06	1.07E-05	yes	up	ref_gene	mRNA
FORC47_RS03475	glpT	glycerol-3-phosphate transporter	2.393	1.25897152	3.07E-06	1.09E-05	yes	up	ref_gene	mRNA
FORC47_RS22380	yhbY	ribosome assembly RNA-binding protein YhbY	4.582	2.196111496	3.16E-06	1.12E-05	yes	up	ref_gene	mRNA
FORC47_RS24835	FORC47_RS24835	class D sortase	9.165	3.196111496	3.22E-06	1.14E-05	yes	up	ref_gene	mRNA
FORC47_RS24425	FORC47_RS24425	haloacid dehalogenase	2.23	1.156985165	3.56E-06	1.26E-05	yes	up	ref_gene	mRNA
FORC47_RS14400	FORC47_RS14400	hypothetical protein	7.402	2.887989201	4.11E-06	1.45E-05	yes	up	ref_gene	mRNA
FORC47_RS10195	FORC47_RS10195	magnesium transporter CorA family protein	2.06	1.042832246	4.23E-06	1.49E-05	yes	up	ref_gene	mRNA
FORC47_RS10115	FORC47_RS10115	GNAT family N-acetyltransferase	2.077	1.05463907	4.64E-06	1.63E-05	yes	up	ref_gene	mRNA
FORC47_RS25885	FORC47_RS25885	TetR/AcrR family transcriptional regulator	2.457	1.296952186	4.71E-06	1.66E-05	yes	up	ref_gene	mRNA
FORC47_RS11000	FORC47_RS11000	hypothetical protein	6.345	2.665596779	4.81E-06	1.69E-05	yes	up	ref_gene	mRNA
FORC47_RS12720	FORC47_RS12720	response regulator transcription factor	3.454	1.788453527	4.99E-06	1.75E-05	yes	up	ref_gene	mRNA
FORC47_RS08655	flhF	ATP-binding cassette domain-containing protein	4.465	2.158636791	5.35E-06	1.87E-05	yes	up	ref_gene	mRNA
FORC47_RS01065	FORC47_RS01065	hypothetical protein	4.465	2.158636791	5.35E-06	1.87E-05	yes	up	ref_gene	mRNA
FORC47_RS18155	FORC47_RS18155	exonuclease	2.884	1.528093256	6.32E-06	2.20E-05	yes	up	ref_gene	mRNA
FORC47_RS15200	FORC47_RS15200	sugar ABC transporter ATP-binding protein	3.114	1.638629732	8.03E-06	2.78E-05	yes	up	ref_gene	mRNA
FORC47_RS26655	FORC47_RS26655	ABC transporter ATP-binding protein/permease	2.435	1.284167673	8.39E-06	2.90E-05	yes	up	ref_gene	mRNA
FORC47_RS22930	FORC47_RS22930	Rne/Rng family ribonuclease	2.075	1.053153542	8.65E-06	2.99E-05	yes	up	ref_gene	mRNA
FORC47_RS17890	FORC47_RS17890	GNAT family N-acetyltransferase	3.475	1.796841313	9.11E-06	3.14E-05	yes	up	ref_gene	mRNA
FORC47_RS27125	FORC47_RS27125	SGNH/GDSL hydrolase family protein	3.172	1.665596779	9.39E-06	3.23E-05	yes	up	ref_gene	mRNA
FORC47_RS06660	calY	biofilm matrix protein CalY	2.094	1.066420419	9.47E-06	3.26E-05	yes	up	ref_gene	mRNA
FORC47_RS14790	FORC47_RS14790	MFS transporter	2.395	1.259957978	9.95E-06	3.42E-05	yes	up	ref_gene	mRNA
FORC47_RS15735	FORC47_RS15735	8-oxo-dGTP diphosphatase	3.005	1.587594267	1.06E-05	3.63E-05	yes	up	ref_gene	mRNA
FORC47_RS00100	FORC47_RS00100	deoxynucleoside kinase	3.239	1.695344123	1.09E-05	3.74E-05	yes	up	ref_gene	mRNA
FORC47_RS22570	FORC47_RS22570	bifunctional cystathionine gamma-lyase/homocysteine desulfhydrase	2.87	1.52120687	1.15E-05	3.94E-05	yes	up	ref_gene	mRNA
FORC47_RS06655	FORC47_RS06655	DUF4047 domain-containing protein	6.874	2.781073997	1.34E-05	4.56E-05	yes	up	ref_gene	mRNA
FORC47_RS18190	FORC47_RS18190	CatB-related O-acetyltransferase	4.018	2.006633697	1.40E-05	4.78E-05	yes	up	ref_gene	mRNA
FORC47_RS24830	FORC47_RS24830	response regulator transcription factor	11.104	3.472951701	1.46E-05	4.98E-05	yes	up	ref_gene	mRNA
FORC47_RS12555	FORC47_RS12555	sigma-70 family RNA polymerase sigma factor	11.104	3.472951701	1.46E-05	4.98E-05	yes	up	ref_gene	mRNA
FORC47_RS00220	FORC47_RS00220	GIY-YIG nuclease family protein	4.23	2.080634279	1.51E-05	5.10E-05	yes	up	ref_gene	mRNA
FORC47_RS01515	rimI	ribosomal protein S18-alanine N-acetyltransferase	2.95	1.56062722	1.63E-05	5.51E-05	yes	up	ref_gene	mRNA
FORC47_RS04075	FORC47_RS04075	disulfide oxidoreductase	2.48	1.310116125	1.87E-05	6.27E-05	yes	up	ref_gene	mRNA
FORC47_RS25915	FORC47_RS25915	D-alanyl-D-alanine carboxypeptidase	3.613	1.853223783	1.88E-05	6.30E-05	yes	up	ref_gene	mRNA
FORC47_RS22625	FORC47_RS22625	O-methyltransferase	3.613	1.853223783	1.88E-05	6.30E-05	yes	up	ref_gene	mRNA
FORC47_RS04660	FORC47_RS04660	S-layer homology domain-containing protein	2.115	1.080634279	1.93E-05	6.46E-05	yes	up	ref_gene	mRNA
FORC47_RS28285	FORC47_RS28285	DUF951 domain-containing protein	2.996	1.583134619	1.94E-05	6.48E-05	yes	up	ref_gene	mRNA
FORC47_RS04650	FORC47_RS04650	polysaccharide biosynthesis protein	2.092	1.065204238	2.18E-05	7.25E-05	yes	up	ref_gene	mRNA
FORC47_RS01755	purM	phosphoribosylformylglycinamidine cyclo-ligase	2.493	1.317673476	2.28E-05	7.59E-05	yes	up	ref_gene	mRNA
FORC47_RS27335	nuoH	NADH-quinone oxidoreductase subunit NuoH	2.562	1.357474484	2.30E-05	7.65E-05	yes	up	ref_gene	mRNA
FORC47_RS08045	FORC47_RS08045	hypothetical protein	6.609	2.724490468	2.40E-05	7.98E-05	yes	up	ref_gene	mRNA
FORC47_RS09945	FORC47_RS09945	PLP-dependent aminotransferase family protein	2.071	1.05026063	2.45E-05	8.12E-05	yes	up	ref_gene	mRNA
FORC47_RS13820	FORC47_RS13820	FAD-dependent monooxygenase	4.112	2.039992294	2.52E-05	8.35E-05	yes	up	ref_gene	mRNA
FORC47_RS24670	FORC47_RS24670	ABC transporter ATP-binding protein	2.339	1.226064718	2.54E-05	8.43E-05	yes	up	ref_gene	mRNA
FORC47_RS07290	hisG	ATP phosphoribosyltransferase	2.388	1.255720985	2.65E-05	8.77E-05	yes	up	ref_gene	mRNA
FORC47_RS12760	FORC47_RS12760	M4 family metallopeptidase	2.77	1.469676569	2.67E-05	8.82E-05	yes	up	ref_gene	mRNA
FORC47_RS14675	FORC47_RS14675	spore coat protein	10.575	3.402562374	2.73E-05	9.01E-05	yes	up	ref_gene	mRNA
FORC47_RS18140	FORC47_RS18140	hypothetical protein	3.172	1.665596779	3.16E-05	0.000103655	yes	up	ref_gene	mRNA
FORC47_RS08465	FORC47_RS08465	transglycosylase	2.091	1.064514613	3.30E-05	0.000108384	yes	up	ref_gene	mRNA
FORC47_RS25425	FORC47_RS25425	biotin transporter BioY	2.692	1.428557582	3.34E-05	0.000109407	yes	up	ref_gene	mRNA
FORC47_RS22355	comER	late competence protein ComER	17.977	4.16809712	3.34E-05	0.000109349	yes	up	ref_gene	mRNA
FORC47_RS28020	FORC47_RS28020	DUF2304 domain-containing protein	2.522	1.334390871	3.40E-05	0.000111113	yes	up	ref_gene	mRNA
FORC47_RS18955	FORC47_RS18955	NERD domain-containing protein	2.069	1.048925419	3.71E-05	0.000121022	yes	up	ref_gene	mRNA
FORC47_RS13925	FORC47_RS13925	ABC transporter ATP-binding protein	2.305	1.204942329	3.79E-05	0.000123413	yes	up	ref_gene	mRNA
FORC47_RS23930	FORC47_RS23930	alpha/beta-type small acid-soluble spore protein	3.807	1.928631185	3.82E-05	0.000124271	yes	up	ref_gene	mRNA
FORC47_RS04655	csaB	polysaccharide pyruvyl transferase CsaB	2.407	1.267047403	3.98E-05	0.000129576	yes	up	ref_gene	mRNA
FORC47_RS01875	gatC	Asp-tRNA(Asn)/Glu-tRNA(Gln) amidotransferase subunit GatC	2.621	1.389962337	4.13E-05	0.000133913	yes	up	ref_gene	mRNA
FORC47_RS16995	FORC47_RS16995	GNAT family N-acetyltransferase	3.335	1.737746565	4.25E-05	0.000137675	yes	up	ref_gene	mRNA
FORC47_RS22030	FORC47_RS22030	5-formyltetrahydrofolate cyclo-ligase	2.169	1.117160155	4.26E-05	0.000137673	yes	up	ref_gene	mRNA
FORC47_RS08640	fliR	flagellar type III secretion system protein FliR	6.345	2.665596779	4.31E-05	0.000139163	yes	up	ref_gene	mRNA
FORC47_RS06035	FORC47_RS06035	ComZ family protein	2.879	1.525419121	4.60E-05	0.000148338	yes	up	ref_gene	mRNA
FORC47_RS21345	proI	pyrroline-5-carboxylate reductase ProI	5.499	2.459145902	4.69E-05	0.000151103	yes	up	ref_gene	mRNA
FORC47_RS30030	FORC47_RS30030	aspartate phosphatase	2.417	1.273279357	4.88E-05	0.000157189	yes	up	ref_gene	mRNA
FORC47_RS20800	mtnA	S-methyl-5-thioribose-1-phosphate isomerase	2.644	1.402562374	5.01E-05	0.000160992	yes	up	ref_gene	mRNA
FORC47_RS14755	FORC47_RS14755	nucleoside hydrolase	3.557	1.830656026	5.56E-05	0.000178103	yes	up	ref_gene	mRNA
FORC47_RS29130	FORC47_RS29130	ABC transporter ATP-binding protein	3.174	1.66628117	5.58E-05	0.000178517	yes	up	ref_gene	mRNA
FORC47_RS25855	FORC47_RS25855	phosphatase PAP2 family protein	2.37	1.245021097	5.78E-05	0.000184645	yes	up	ref_gene	mRNA
FORC47_RS00415	folP	dihydropteroate synthase	2.496	1.319421138	6.11E-05	0.000194913	yes	up	ref_gene	mRNA
FORC47_RS30955	FORC47_RS30955	hypothetical protein	3.701	1.887989201	6.25E-05	0.000199039	yes	up	ref_gene	mRNA
FORC47_RS28625	FORC47_RS28625	penicillin-binding protein 2	4.874	2.285221889	6.32E-05	0.000200913	yes	up	ref_gene	mRNA
FORC47_RS13580	FORC47_RS13580	TetR family transcriptional regulator	7.402	2.887989201	6.64E-05	0.0002111	yes	up	ref_gene	mRNA
FORC47_RS15660	FORC47_RS15660	VOC family protein	7.402	2.887989201	6.64E-05	0.0002111	yes	up	ref_gene	mRNA
FORC47_RS21515	FORC47_RS21515	sigma 54-interacting transcriptional regulator	2.023	1.016503941	7.04E-05	0.00022315	yes	up	ref_gene	mRNA
FORC47_RS03720	FORC47_RS03720	sodium:solute symporter	2.334	1.222653284	8.35E-05	0.000263266	yes	up	ref_gene	mRNA
FORC47_RS17210	FORC47_RS17210	methyl-accepting chemotaxis protein	3.097	1.630831361	9.11E-05	0.000286326	yes	up	ref_gene	mRNA
FORC47_RS24480	FORC47_RS24480	YtzC family protein	29.61	4.887989201	9.71E-05	0.000304215	yes	up	ref_gene	mRNA
FORC47_RS26300	FORC47_RS26300	NERD domain-containing protein	2.291	1.196111496	9.76E-05	0.000305445	yes	up	ref_gene	mRNA
FORC47_RS13650	FORC47_RS13650	glycerophosphodiester phosphodiesterase	2.144	1.100533836	0.00011208	0.000349662	yes	up	ref_gene	mRNA
FORC47_RS07260	ilvC	ketol-acid reductoisomerase	15.862	3.987524874	0.000119576	0.000372642	yes	up	ref_gene	mRNA
FORC47_RS14665	FORC47_RS14665	spore coat protein	15.862	3.987524874	0.000119576	0.000372642	yes	up	ref_gene	mRNA
FORC47_RS11005	FORC47_RS11005	N-acetylmuramoyl-L-alanine amidase	3.966	1.987524874	0.000125584	0.00039073	yes	up	ref_gene	mRNA
FORC47_RS09475	FORC47_RS09475	DUF896 domain-containing protein	2.115	1.080634279	0.00012707	0.000395138	yes	up	ref_gene	mRNA
FORC47_RS20495	FORC47_RS20495	Cof-type HAD-IIB family hydrolase	2.062	1.044108403	0.000130543	0.000405716	yes	up	ref_gene	mRNA
FORC47_RS15620	FORC47_RS15620	DMT family transporter	2.568	1.360742198	0.000135581	0.000420918	yes	up	ref_gene	mRNA
FORC47_RS17010	FORC47_RS17010	tryptophan--tRNA ligase	4.582	2.196111496	0.000141923	0.000440368	yes	up	ref_gene	mRNA
FORC47_RS08175	FORC47_RS08175	hypothetical protein	3.365	1.750485677	0.000144004	0.000446342	yes	up	ref_gene	mRNA
FORC47_RS02250	FORC47_RS02250	ABC transporter ATP-binding protein	2.014	1.010244951	0.000162871	0.000501564	yes	up	ref_gene	mRNA
FORC47_RS23985	FORC47_RS23985	hypothetical protein	2.5	1.321642378	0.00016453	0.000505587	yes	up	ref_gene	mRNA
FORC47_RS06845	FORC47_RS06845	FAD-binding oxidoreductase	2.146	1.101695894	0.000170785	0.000523687	yes	up	ref_gene	mRNA
FORC47_RS07985	panD	aspartate 1-decarboxylase	2.146	1.101695894	0.000170785	0.000523687	yes	up	ref_gene	mRNA
FORC47_RS18300	FORC47_RS18300	molybdopterin-synthase adenylyltransferase MoeB	8.989	3.16809712	0.000176638	0.000540765	yes	up	ref_gene	mRNA
FORC47_RS22515	FORC47_RS22515	XRE family transcriptional regulator	2.036	1.025492724	0.000180303	0.000551395	yes	up	ref_gene	mRNA
FORC47_RS06645	FORC47_RS06645	signal peptidase I	27.495	4.781073997	0.000182278	0.000556249	yes	up	ref_gene	mRNA
FORC47_RS02640	FORC47_RS02640	small%2C acid-soluble spore protein K	27.495	4.781073997	0.000182278	0.000556249	yes	up	ref_gene	mRNA
FORC47_RS28435	FORC47_RS28435	ABC transporter permease	2.737	1.452603056	0.000196035	0.000597593	yes	up	ref_gene	mRNA
FORC47_RS13020	tenA	thiaminase II	2.616	1.387295617	0.000201022	0.000611496	yes	up	ref_gene	mRNA
FORC47_RS20220	FORC47_RS20220	RsfA family transcriptional regulator	3.833	1.938615274	0.000208063	0.000631573	yes	up	ref_gene	mRNA
FORC47_RS22720	FORC47_RS22720	tRNA threonylcarbamoyladenosine dehydratase	2.034	1.02405075	0.000222591	0.000673886	yes	up	ref_gene	mRNA
FORC47_RS17115	FORC47_RS17115	glycosyltransferase family 2 protein	2.034	1.02405075	0.000222591	0.000673886	yes	up	ref_gene	mRNA
FORC47_RS10825	FORC47_RS10825	lipid II flippase Amj family protein	3.269	1.708665501	0.000229978	0.000695516	yes	up	ref_gene	mRNA
FORC47_RS01760	purN	phosphoribosylglycinamide formyltransferase	3.269	1.708665501	0.000229978	0.000695516	yes	up	ref_gene	mRNA
FORC47_RS09190	FORC47_RS09190	polysaccharide deacetylase family protein	2.644	1.402562374	0.000244375	0.000736338	yes	up	ref_gene	mRNA
FORC47_RS08220	FORC47_RS08220	sugar transferase	3.01	1.589647926	0.000262756	0.000789645	yes	up	ref_gene	mRNA
FORC47_RS14290	FORC47_RS14290	SUMF1/EgtB/PvdO family nonheme iron enzyme	2.675	1.419436192	0.000296674	0.000887391	yes	up	ref_gene	mRNA
FORC47_RS21285	FORC47_RS21285	GDSL-type esterase/lipase family protein	2.56	1.356268721	0.000300241	0.000896654	yes	up	ref_gene	mRNA
FORC47_RS18885	FORC47_RS18885	DMT family transporter	2.228	1.155922406	0.000303071	0.000904165	yes	up	ref_gene	mRNA
FORC47_RS08110	FORC47_RS08110	type I methionyl aminopeptidase	3.525	1.817599873	0.000303971	0.000906378	yes	up	ref_gene	mRNA
FORC47_RS14340	FORC47_RS14340	GNAT family N-acetyltransferase	2.149	1.103717892	0.000322019	0.0009577	yes	up	ref_gene	mRNA
FORC47_RS13040	FORC47_RS13040	hypothetical protein	8.46	3.080634279	0.000328289	0.000975336	yes	up	ref_gene	mRNA
FORC47_RS04780	bla	class A beta-lactamase	2.961	1.566061106	0.000342701	0.001014997	yes	up	ref_gene	mRNA
FORC47_RS15265	proC	pyrroline-5-carboxylate reductase	2.188	1.129543879	0.000348464	0.001031001	yes	up	ref_gene	mRNA
FORC47_RS28175	FORC47_RS28175	GAF domain-containing protein	2.485	1.313295035	0.000364078	0.001074977	yes	up	ref_gene	mRNA
FORC47_RS20650	nucA	DNA-entry nuclease	3.172	1.665596779	0.000365195	0.001077721	yes	up	ref_gene	mRNA
FORC47_RS27340	nuoD	NADH-quinone oxidoreductase subunit NuoD	2.115	1.080634279	0.000365593	0.001077786	yes	up	ref_gene	mRNA
FORC47_RS18025	FORC47_RS18025	hypothetical protein	3.928	1.973719075	0.000379641	0.001116326	yes	up	ref_gene	mRNA
FORC47_RS09260	ilvD	dihydroxy-acid dehydratase	3.928	1.973719075	0.000379641	0.001116326	yes	up	ref_gene	mRNA
FORC47_RS12195	FORC47_RS12195	AbrB/MazE/SpoVT family DNA-binding domain-containing protein	6.345	2.665596779	0.000396618	0.001164456	yes	up	ref_gene	mRNA
FORC47_RS15645	FORC47_RS15645	uridine kinase	5.287	2.402562374	0.000427607	0.001249677	yes	up	ref_gene	mRNA
FORC47_RS09940	FORC47_RS09940	LysE/ArgO family amino acid transporter	4.653	2.218137802	0.000429054	0.001252629	yes	up	ref_gene	mRNA
FORC47_RS11110	FORC47_RS11110	DNA-binding protein	13.747	3.781073997	0.000432158	0.001261048	yes	up	ref_gene	mRNA
FORC47_RS06745	FORC47_RS06745	helix-turn-helix domain-containing protein	2.505	1.324559862	0.000446043	0.001300903	yes	up	ref_gene	mRNA
FORC47_RS03185	FORC47_RS03185	hemolysin family protein	2.053	1.037565557	0.000463863	0.001349441	yes	up	ref_gene	mRNA
FORC47_RS18015	FORC47_RS18015	methyl-accepting chemotaxis protein	2.996	1.583134619	0.000486618	0.001412056	yes	up	ref_gene	mRNA
FORC47_RS15675	FORC47_RS15675	amino acid permease	2.291	1.196111496	0.000491865	0.001425116	yes	up	ref_gene	mRNA
FORC47_RS24990	FORC47_RS24990	ABC transporter permease	2.082	1.057914202	0.000510635	0.001476513	yes	up	ref_gene	mRNA
FORC47_RS10400	FORC47_RS10400	YitT family protein	2.355	1.235912504	0.000517234	0.001494841	yes	up	ref_gene	mRNA
FORC47_RS27225	FORC47_RS27225	tyrosine protein phosphatase	2.432	1.28226814	0.000536264	0.001547496	yes	up	ref_gene	mRNA
FORC47_RS20645	FORC47_RS20645	competence protein ComJ	2.644	1.402562374	0.000543592	0.001567066	yes	up	ref_gene	mRNA
FORC47_RS08630	FORC47_RS08630	flagellar type III secretion system pore protein FliP	3.076	1.62120266	0.000576455	0.001657633	yes	up	ref_gene	mRNA
FORC47_RS14605	FORC47_RS14605	peptidylprolyl isomerase	3.076	1.62120266	0.000576455	0.001657633	yes	up	ref_gene	mRNA
FORC47_RS22835	FORC47_RS22835	YhcN/YlaJ family sporulation lipoprotein	7.931	2.987524874	0.000608994	0.00174857	yes	up	ref_gene	mRNA
FORC47_RS26260	crcB	fluoride efflux transporter CrcB	7.931	2.987524874	0.000608994	0.00174857	yes	up	ref_gene	mRNA
FORC47_RS16780	FORC47_RS16780	group-specific protein	2.847	1.509477577	0.000631687	0.001811912	yes	up	ref_gene	mRNA
FORC47_RS22320	gpr	GPR endopeptidase	2.449	1.292138384	0.000659	0.001888364	yes	up	ref_gene	mRNA
FORC47_RS16195	FORC47_RS16195	AAA domain-containing protein	3.172	1.665596779	0.00067837	0.001940958	yes	up	ref_gene	mRNA
FORC47_RS17995	rfbG	CDP-glucose 4%2C6-dehydratase	3.172	1.665596779	0.00067837	0.001940958	yes	up	ref_gene	mRNA
FORC47_RS14635	FORC47_RS14635	HAD hydrolase-like protein	4.054	2.019233734	0.000691948	0.001976847	yes	up	ref_gene	mRNA
FORC47_RS05895	FORC47_RS05895	aspartyl-phosphate phosphatase Spo0E family protein	2.247	1.16809712	0.000706514	0.002017453	yes	up	ref_gene	mRNA
FORC47_RS24410	FORC47_RS24410	spore germination protein	5.992	2.583134619	0.000714287	0.002038634	yes	up	ref_gene	mRNA
FORC47_RS26650	FORC47_RS26650	heavy metal-binding domain-containing protein	5.023	2.328561792	0.000750483	0.00213981	yes	up	ref_gene	mRNA
FORC47_RS02945	FORC47_RS02945	response regulator	2.154	1.10710649	0.000754076	0.002148985	yes	up	ref_gene	mRNA
FORC47_RS01960	FORC47_RS01960	M48 family metallopeptidase	3.29	1.718064199	0.000791601	0.002250331	yes	up	ref_gene	mRNA
FORC47_RS02580	FORC47_RS02580	glycosyltransferase	12.69	3.665596779	0.000824216	0.002339566	yes	up	ref_gene	mRNA
FORC47_RS05165	FORC47_RS05165	hypothetical protein	12.69	3.665596779	0.000824216	0.002339566	yes	up	ref_gene	mRNA
FORC47_RS26975	FORC47_RS26975	diguanylate cyclase	2.115	1.080634279	0.000857352	0.002428811	yes	up	ref_gene	mRNA
FORC47_RS21120	spoIIM	stage II sporulation protein M	2.079	1.055543298	0.000968779	0.002729632	yes	up	ref_gene	mRNA
FORC47_RS28260	FORC47_RS28260	YybS family protein	2.766	1.467657402	0.000970468	0.002731705	yes	up	ref_gene	mRNA
FORC47_RS18120	FORC47_RS18120	MgtC/SapB family protein	2.488	1.315099532	0.000994193	0.002793001	yes	up	ref_gene	mRNA
FORC47_RS17840	FORC47_RS17840	NADP-dependent oxidoreductase	2.203	1.139527968	0.001009443	0.002834451	yes	up	ref_gene	mRNA
FORC47_RS23380	srtB	class B sortase	3.877	1.955103397	0.001159365	0.003233247	yes	up	ref_gene	mRNA
FORC47_RS22060	pstC	phosphate ABC transporter permease subunit PstC	3.877	1.955103397	0.001159365	0.003233247	yes	up	ref_gene	mRNA
FORC47_RS06175	FORC47_RS06175	CYTH domain-containing protein	2.82	1.495671778	0.001171428	0.003262124	yes	up	ref_gene	mRNA
FORC47_RS08440	FORC47_RS08440	flagellar motor protein MotP	2.82	1.495671778	0.001171428	0.003262124	yes	up	ref_gene	mRNA
FORC47_RS24340	moaE	molybdopterin synthase catalytic subunit MoaE	2.82	1.495671778	0.001171428	0.003262124	yes	up	ref_gene	mRNA
FORC47_RS11585	FORC47_RS11585	YdbC family protein	2.077	1.05463907	0.001200467	0.003333273	yes	up	ref_gene	mRNA
FORC47_RS15330	FORC47_RS15330	alkaline phosphatase	2.644	1.402562374	0.001216663	0.003374974	yes	up	ref_gene	mRNA
FORC47_RS26565	ppaX	pyrophosphatase PpaX	2.512	1.328561792	0.00122027	0.003383342	yes	up	ref_gene	mRNA
FORC47_RS27350	nuoB	NADH-quinone oxidoreductase subunit NuoB	2.512	1.328561792	0.00122027	0.003383342	yes	up	ref_gene	mRNA
FORC47_RS08020	FORC47_RS08020	GTPase	2.207	1.142034823	0.001250354	0.003463401	yes	up	ref_gene	mRNA
FORC47_RS08645	flhB	flagellar type III secretion system protein FlhB	4.23	2.080634279	0.00125772	0.003482122	yes	up	ref_gene	mRNA
FORC47_RS06230	FORC47_RS06230	exosporium leader peptide-containing protein	5.64	2.495671778	0.001280671	0.003543951	yes	up	ref_gene	mRNA
FORC47_RS17825	FORC47_RS17825	glycerophosphodiester phosphodiesterase	5.64	2.495671778	0.001280671	0.003543951	yes	up	ref_gene	mRNA
FORC47_RS27610	uvsE	UV DNA damage repair endonuclease UvsE	4.759	2.25055928	0.001309904	0.003614377	yes	up	ref_gene	mRNA
FORC47_RS10205	FORC47_RS10205	TIGR03943 family protein	2.042	1.030008206	0.001348716	0.00371789	yes	up	ref_gene	mRNA
FORC47_RS21235	bioB	biotin synthase	3.305	1.724490468	0.001476973	0.004055836	yes	up	ref_gene	mRNA
FORC47_RS11975	FORC47_RS11975	ATPase	3.305	1.724490468	0.001476973	0.004055836	yes	up	ref_gene	mRNA
FORC47_RS22350	FORC47_RS22350	helix-hairpin-helix domain-containing protein	2.009	1.006633697	0.001506964	0.004128302	yes	up	ref_gene	mRNA
FORC47_RS27110	FORC47_RS27110	HAMP domain-containing histidine kinase	2.211	1.144764616	0.001549531	0.004230759	yes	up	ref_gene	mRNA
FORC47_RS26050	FORC47_RS26050	DMT family transporter	2.115	1.080634279	0.001633046	0.004450302	yes	up	ref_gene	mRNA
FORC47_RS17970	FORC47_RS17970	Ger(x)C family spore germination protein	2.115	1.080634279	0.001633046	0.004450302	yes	up	ref_gene	mRNA
FORC47_RS14615	FORC47_RS14615	response regulator transcription factor	2.961	1.566061106	0.001686807	0.004585906	yes	up	ref_gene	mRNA
FORC47_RS17740	FORC47_RS17740	N-acetyltransferase	2.732	1.449868088	0.001799477	0.004885269	yes	up	ref_gene	mRNA
FORC47_RS21990	metC	cystathionine beta-lyase	2.445	1.290087644	0.001811126	0.00491224	yes	up	ref_gene	mRNA
FORC47_RS05615	FORC47_RS05615	hypothetical protein	3.701	1.887989201	0.001929342	0.005220519	yes	up	ref_gene	mRNA
FORC47_RS16025	FORC47_RS16025	alpha/beta hydrolase	3.055	1.611148995	0.002007483	0.005424275	yes	up	ref_gene	mRNA
FORC47_RS06910	FORC47_RS06910	class II aldolase/adducin family protein	2.115	1.080634279	0.002026662	0.005470938	yes	up	ref_gene	mRNA
FORC47_RS25890	FORC47_RS25890	MBL fold metallo-hydrolase	2.115	1.080634279	0.002026662	0.005470938	yes	up	ref_gene	mRNA
FORC47_RS17250	FORC47_RS17250	heme-degrading domain-containing protein	6.874	2.781073997	0.002079858	0.005606617	yes	up	ref_gene	mRNA
FORC47_RS13655	FORC47_RS13655	M15 family metallopeptidase	6.874	2.781073997	0.002079858	0.005606617	yes	up	ref_gene	mRNA
FORC47_RS26895	FORC47_RS26895	arsenic transporter	6.874	2.781073997	0.002079858	0.005606617	yes	up	ref_gene	mRNA
FORC47_RS23660	FORC47_RS23660	DUF441 domain-containing protein	4.018	2.006633697	0.002132694	0.005738247	yes	up	ref_gene	mRNA
FORC47_RS27235	FORC47_RS27235	Wzz/FepE/Etk N-terminal domain-containing protein	2.364	1.241098951	0.002159816	0.005805771	yes	up	ref_gene	mRNA
FORC47_RS11280	FORC47_RS11280	phosphatase PAP2 family protein	2.163	1.113055756	0.002208162	0.005932947	yes	up	ref_gene	mRNA
FORC47_RS21985	metI	cystathionine gamma-synthase/O-acetylhomoserine thiolyase	2.163	1.113055756	0.002208162	0.005932947	yes	up	ref_gene	mRNA
FORC47_RS30060	FORC47_RS30060	YjcZ family sporulation protein	4.494	2.16809712	0.002272326	0.00607402	yes	up	ref_gene	mRNA
FORC47_RS14370	FORC47_RS14370	CPBP family glutamic-type intramembrane protease	4.494	2.16809712	0.002272326	0.00607402	yes	up	ref_gene	mRNA
FORC47_RS25585	FORC47_RS25585	DUF2628 domain-containing protein	5.287	2.402562374	0.002284493	0.006100851	yes	up	ref_gene	mRNA
FORC47_RS24685	FORC47_RS24685	hypothetical protein	3.172	1.665596779	0.002370344	0.006324227	yes	up	ref_gene	mRNA
FORC47_RS00060	FORC47_RS00060	YaaC family protein	19.035	4.25055928	0.002406149	0.006413785	yes	up	ref_gene	mRNA
FORC47_RS21935	FORC47_RS21935	L-cystine transporter	2.115	1.080634279	0.002516794	0.006693155	yes	up	ref_gene	mRNA
FORC47_RS01590	FORC47_RS01590	alpha/beta hydrolase	2.493	1.317673476	0.00274649	0.007266913	yes	up	ref_gene	mRNA
FORC47_RS23210	FORC47_RS23210	ATP-binding cassette domain-containing protein	2.493	1.317673476	0.00274649	0.007266913	yes	up	ref_gene	mRNA
FORC47_RS27325	FORC47_RS27325	NADH-quinone oxidoreductase subunit J	2.226	1.15463486	0.002958996	0.007793202	yes	up	ref_gene	mRNA
FORC47_RS13815	FORC47_RS13815	GNAT family N-acetyltransferase	2.226	1.15463486	0.002958996	0.007793202	yes	up	ref_gene	mRNA
FORC47_RS04550	FORC47_RS04550	amino acid ABC transporter ATP-binding protein	2.302	1.202624803	0.003152217	0.008275472	yes	up	ref_gene	mRNA
FORC47_RS26175	FORC47_RS26175	pyrimidine nucleoside transporter NupC	3.525	1.817599873	0.00318704	0.008363063	yes	up	ref_gene	mRNA
FORC47_RS08255	FORC47_RS08255	GNAT family N-acetyltransferase	2.397	1.261206524	0.00330174	0.008636364	yes	up	ref_gene	mRNA
FORC47_RS21155	FORC47_RS21155	YqkE family protein	2.397	1.261206524	0.00330174	0.008636364	yes	up	ref_gene	mRNA
FORC47_RS23890	FORC47_RS23890	class I SAM-dependent methyltransferase	2.168	1.116258188	0.003408334	0.008894883	yes	up	ref_gene	mRNA
FORC47_RS08720	FORC47_RS08720	MFS transporter	2.069	1.048925419	0.003538795	0.00921856	yes	up	ref_gene	mRNA
FORC47_RS20285	FORC47_RS20285	YlbE-like family protein	6.345	2.665596779	0.003824386	0.009930926	yes	up	ref_gene	mRNA
FORC47_RS06705	FORC47_RS06705	phosphatase PAP2 family protein	6.345	2.665596779	0.003824386	0.009930926	yes	up	ref_gene	mRNA
FORC47_RS12875	FORC47_RS12875	cysteine dioxygenase family protein	2.749	1.459145902	0.004074294	0.010541661	yes	up	ref_gene	mRNA
FORC47_RS04275	FORC47_RS04275	ABC transporter permease subunit	2.417	1.273279357	0.004082723	0.010558704	yes	up	ref_gene	mRNA
FORC47_RS09265	ilvA	threonine ammonia-lyase IlvA	2.171	1.118108984	0.004239191	0.010948537	yes	up	ref_gene	mRNA
FORC47_RS12610	FORC47_RS12610	TetR/AcrR family transcriptional regulator	3.172	1.665596779	0.004467472	0.011512178	yes	up	ref_gene	mRNA
FORC47_RS02020	FORC47_RS02020	iron ABC transporter permease	2.239	1.163096439	0.004568894	0.011757669	yes	up	ref_gene	mRNA
FORC47_RS06515	FORC47_RS06515	DUF4878 domain-containing protein	2.239	1.163096439	0.004568894	0.011757669	yes	up	ref_gene	mRNA
FORC47_RS20765	FORC47_RS20765	hypothetical protein	16.92	4.080634279	0.004668894	0.011998849	yes	up	ref_gene	mRNA
FORC47_RS16890	FORC47_RS16890	winged helix-turn-helix transcriptional regulator	16.92	4.080634279	0.004668894	0.011998849	yes	up	ref_gene	mRNA
FORC47_RS30680	FORC47_RS30680	hypothetical protein	16.92	4.080634279	0.004668894	0.011998849	yes	up	ref_gene	mRNA
FORC47_RS01350	FORC47_RS01350	MFS transporter	2.023	1.016503941	0.004944825	0.012651245	yes	up	ref_gene	mRNA
FORC47_RS09820	FORC47_RS09820	polysaccharide deacetylase family protein	3.349	1.743599291	0.005222439	0.013331759	yes	up	ref_gene	mRNA
FORC47_RS08620	fliN	flagellar motor switch protein FliN	2.247	1.16809712	0.005683484	0.014463609	yes	up	ref_gene	mRNA
FORC47_RS06425	FORC47_RS06425	zinc ribbon domain-containing protein	9.517	3.25055928	0.005779581	0.014688594	yes	up	ref_gene	mRNA
FORC47_RS11970	anmK	anhydro-N-acetylmuramic acid kinase AnmK	3.595	1.846169025	0.005995437	0.015216939	yes	up	ref_gene	mRNA
FORC47_RS04805	FORC47_RS04805	tripartite tricarboxylate transporter substrate-binding protein	2.115	1.080634279	0.006031718	0.015302247	yes	up	ref_gene	mRNA
FORC47_RS16965	FORC47_RS16965	YjjG family noncanonical pyrimidine nucleotidase	2.019	1.013520083	0.006156242	0.015597446	yes	up	ref_gene	mRNA
FORC47_RS13375	FORC47_RS13375	hypothetical protein	2.467	1.3030267	0.006240847	0.015804813	yes	up	ref_gene	mRNA
FORC47_RS03430	FORC47_RS03430	ArsR family transcriptional regulator	2.467	1.3030267	0.006240847	0.015804813	yes	up	ref_gene	mRNA
FORC47_RS12535	FORC47_RS12535	FtsW/RodA/SpoVE family cell cycle protein	2.644	1.402562374	0.006256501	0.015830466	yes	up	ref_gene	mRNA
FORC47_RS17720	FORC47_RS17720	LysR family transcriptional regulator	3.966	1.987524874	0.006693394	0.016846658	yes	up	ref_gene	mRNA
FORC47_RS04055	FORC47_RS04055	L%2CD-transpeptidase	3.966	1.987524874	0.006693394	0.016846658	yes	up	ref_gene	mRNA
FORC47_RS04725	FORC47_RS04725	ABC transporter substrate-binding protein	3.966	1.987524874	0.006693394	0.016846658	yes	up	ref_gene	mRNA
FORC47_RS26850	FORC47_RS26850	dicarboxylate/amino acid:cation symporter	3.966	1.987524874	0.006693394	0.016846658	yes	up	ref_gene	mRNA
FORC47_RS20430	FORC47_RS20430	protein-glutamine gamma-glutamyltransferase	3.966	1.987524874	0.006693394	0.016846658	yes	up	ref_gene	mRNA
FORC47_RS25055	FORC47_RS25055	response regulator transcription factor	5.816	2.540065897	0.00700129	0.01755991	yes	up	ref_gene	mRNA
FORC47_RS24470	FORC47_RS24470	DUF418 domain-containing protein	5.816	2.540065897	0.00700129	0.01755991	yes	up	ref_gene	mRNA
FORC47_RS03040	FORC47_RS03040	2-hydroxycarboxylate transporter family protein	2.256	1.173743683	0.007075583	0.017699766	yes	up	ref_gene	mRNA
FORC47_RS09730	FORC47_RS09730	DegT/DnrJ/EryC1/StrS family aminotransferase	2.256	1.173743683	0.007075583	0.017699766	yes	up	ref_gene	mRNA
FORC47_RS18295	FORC47_RS18295	molybdopterin molybdotransferase MoeA	2.256	1.173743683	0.007075583	0.017699766	yes	up	ref_gene	mRNA
FORC47_RS23135	gerM	spore germination protein GerM	4.582	2.196111496	0.007136769	0.017829478	yes	up	ref_gene	mRNA
FORC47_RS24320	FORC47_RS24320	glucose 1-dehydrogenase	4.582	2.196111496	0.007136769	0.017829478	yes	up	ref_gene	mRNA
FORC47_RS17820	FORC47_RS17820	DUF3916 domain-containing protein	3.021	1.595207451	0.007146215	0.017837526	yes	up	ref_gene	mRNA
FORC47_RS10175	cotH	spore coat protein CotH	3.021	1.595207451	0.007146215	0.017837526	yes	up	ref_gene	mRNA
FORC47_RS15590	FORC47_RS15590	CPBP family intramembrane metalloprotease	3.021	1.595207451	0.007146215	0.017837526	yes	up	ref_gene	mRNA
FORC47_RS15905	FORC47_RS15905	glutathione-dependent formaldehyde dehydrogenase	2.115	1.080634279	0.007521868	0.018677568	yes	up	ref_gene	mRNA
FORC47_RS12105	FORC47_RS12105	class I SAM-dependent methyltransferase	2.115	1.080634279	0.007521868	0.018677568	yes	up	ref_gene	mRNA
FORC47_RS16580	FORC47_RS16580	hypothetical protein	2.702	1.434271233	0.007653675	0.018971978	yes	up	ref_gene	mRNA
FORC47_RS22970	radC	DNA repair protein RadC	2.702	1.434271233	0.007653675	0.018971978	yes	up	ref_gene	mRNA
FORC47_RS08525	flgC	flagellar basal body rod protein FlgC	2.014	1.010244951	0.007671465	0.018999641	yes	up	ref_gene	mRNA
FORC47_RS11505	dhbA	2%2C3-dihydro-2%2C3-dihydroxybenzoate dehydrogenase	2.5	1.321642378	0.007712355	0.01909266	yes	up	ref_gene	mRNA
FORC47_RS15185	lsrB	autoinducer 2 ABC transporter substrate-binding protein LsrB	2.5	1.321642378	0.007712355	0.01909266	yes	up	ref_gene	mRNA
FORC47_RS05000	FORC47_RS05000	hypothetical protein	2.5	1.321642378	0.007712355	0.01909266	yes	up	ref_gene	mRNA
FORC47_RS16225	FORC47_RS16225	hypothetical protein	2.181	1.125028398	0.008199725	0.020229283	yes	up	ref_gene	mRNA
FORC47_RS24820	thiT	energy-coupled thiamine transporter ThiT	3.172	1.665596779	0.008483033	0.020901231	yes	up	ref_gene	mRNA
FORC47_RS02445	FORC47_RS02445	pyridoxamine 5'-phosphate oxidase family protein	14.805	3.887989201	0.009134527	0.02241969	yes	up	ref_gene	mRNA
FORC47_RS08875	FORC47_RS08875	class I SAM-dependent methyltransferase	14.805	3.887989201	0.009134527	0.02241969	yes	up	ref_gene	mRNA
FORC47_RS04060	FORC47_RS04060	hypothetical protein	14.805	3.887989201	0.009134527	0.02241969	yes	up	ref_gene	mRNA
FORC47_RS12505	FORC47_RS12505	glutamate decarboxylase	2.379	1.25055928	0.009295934	0.022776826	yes	up	ref_gene	mRNA
FORC47_RS07540	FORC47_RS07540	PBP1A family penicillin-binding protein	2.538	1.343668684	0.009524519	0.023277193	yes	up	ref_gene	mRNA
FORC47_RS23185	FORC47_RS23185	XRE family transcriptional regulator	2.009	1.006633697	0.009569218	0.023376467	yes	up	ref_gene	mRNA
FORC47_RS08660	flgG	flagellar basal-body rod protein FlgG	3.384	1.758706184	0.009924043	0.024181416	yes	up	ref_gene	mRNA
FORC47_RS09145	FORC47_RS09145	MFS transporter	2.056	1.039992294	0.01064212	0.025865137	yes	up	ref_gene	mRNA
FORC47_RS28180	rlmH	23S rRNA (pseudouridine(1915)-N(3))-methyltransferase RlmH	8.46	3.080634279	0.011090027	0.026873971	yes	up	ref_gene	mRNA
FORC47_RS27220	galU	UTP--glucose-1-phosphate uridylyltransferase GalU	8.46	3.080634279	0.011090027	0.026873971	yes	up	ref_gene	mRNA
FORC47_RS18560	FORC47_RS18560	ABC transporter ATP-binding protein/permease	8.46	3.080634279	0.011090027	0.026873971	yes	up	ref_gene	mRNA
FORC47_RS01640	FORC47_RS01640	glycoside hydrolase family 99-like domain-containing protein	2.87	1.52120687	0.011325766	0.027387328	yes	up	ref_gene	mRNA
FORC47_RS12985	FORC47_RS12985	ABC transporter permease	3.701	1.887989201	0.011345512	0.027423505	yes	up	ref_gene	mRNA
FORC47_RS03170	FORC47_RS03170	LCP family protein	2.115	1.080634279	0.011737157	0.028322378	yes	up	ref_gene	mRNA
FORC47_RS09240	ilvE	branched-chain-amino-acid transaminase	2.585	1.370140896	0.011749711	0.028340739	yes	up	ref_gene	mRNA
FORC47_RS01735	purS	phosphoribosylformylglycinamidine synthase subunit PurS	4.23	2.080634279	0.01247457	0.029963019	yes	up	ref_gene	mRNA
FORC47_RS12495	splB	spore photoproduct lyase	4.23	2.080634279	0.01247457	0.029963019	yes	up	ref_gene	mRNA
FORC47_RS15295	FORC47_RS15295	VOC family protein	4.23	2.080634279	0.01247457	0.029963019	yes	up	ref_gene	mRNA
FORC47_RS17225	FORC47_RS17225	GTP cyclohydrolase II	5.287	2.402562374	0.012747922	0.030555558	yes	up	ref_gene	mRNA
FORC47_RS17980	FORC47_RS17980	sugar phosphate nucleotidyltransferase	5.287	2.402562374	0.012747922	0.030555558	yes	up	ref_gene	mRNA
FORC47_RS15750	lepB	signal peptidase I	5.287	2.402562374	0.012747922	0.030555558	yes	up	ref_gene	mRNA
FORC47_RS02455	FORC47_RS02455	YfkD famly protein	5.287	2.402562374	0.012747922	0.030555558	yes	up	ref_gene	mRNA
FORC47_RS14215	FORC47_RS14215	DUF4181 domain-containing protein	2.191	1.131260352	0.012796922	0.030621779	yes	up	ref_gene	mRNA
FORC47_RS08545	fliH	FliH/SctL family protein	2.996	1.583134619	0.013647925	0.032522353	yes	up	ref_gene	mRNA
FORC47_RS14640	FORC47_RS14640	5'-methylthioadenosine/adenosylhomocysteine nucleosidase	2.996	1.583134619	0.013647925	0.032522353	yes	up	ref_gene	mRNA
FORC47_RS09800	hitS	envelope stress sensor histidine kinase HitS	2.644	1.402562374	0.014469666	0.034408985	yes	up	ref_gene	mRNA
FORC47_RS30215	FORC47_RS30215	DUF86 domain-containing protein	2.115	1.080634279	0.014690078	0.034846372	yes	up	ref_gene	mRNA
FORC47_RS09575	FORC47_RS09575	LysR family transcriptional regulator	3.172	1.665596779	0.016266891	0.038332876	yes	up	ref_gene	mRNA
FORC47_RS06465	FORC47_RS06465	SagB family peptide dehydrogenase	2.049	1.034830589	0.016662948	0.039169547	yes	up	ref_gene	mRNA
FORC47_RS15545	FORC47_RS15545	alpha/beta hydrolase	2.049	1.034830589	0.016662948	0.039169547	yes	up	ref_gene	mRNA
FORC47_RS26210	FORC47_RS26210	aldo/keto reductase	2.307	1.206165161	0.017151915	0.04015426	yes	up	ref_gene	mRNA
FORC47_RS04490	FORC47_RS04490	amino acid permease	2.307	1.206165161	0.017151915	0.04015426	yes	up	ref_gene	mRNA
FORC47_RS18555	FORC47_RS18555	hypothetical protein	12.69	3.665596779	0.018032952	0.042079335	yes	up	ref_gene	mRNA
FORC47_RS17830	FORC47_RS17830	FAD-dependent monooxygenase	2.115	1.080634279	0.01841348	0.042827781	yes	up	ref_gene	mRNA
FORC47_RS13845	FORC47_RS13845	hypothetical protein	3.437	1.781073997	0.019044906	0.04427844	yes	up	ref_gene	mRNA
FORC47_RS22430	FORC47_RS22430	nitroreductase family protein	3.437	1.781073997	0.019044906	0.04427844	yes	up	ref_gene	mRNA
FORC47_RS30990	FORC47_RS30990	hypothetical protein	7.402	2.887989201	0.021287369	0.04903453	yes	up	ref_gene	mRNA
FORC47_RS20290	FORC47_RS20290	YlbD family protein	7.402	2.887989201	0.021287369	0.04903453	yes	up	ref_gene	mRNA
FORC47_RS02700	FORC47_RS02700	ATP-binding cassette domain-containing protein	7.402	2.887989201	0.021287369	0.04903453	yes	up	ref_gene	mRNA
FORC47_RS01030	FORC47_RS01030	NAD(P)-dependent alcohol dehydrogenase	7.402	2.887989201	0.021287369	0.04903453	yes	up	ref_gene	mRNA
FORC47_RS14750	FORC47_RS14750	GlsB/YeaQ/YmgE family stress response membrane protein	7.402	2.887989201	0.021287369	0.04903453	yes	up	ref_gene	mRNA
FORC47_RS20005	FORC47_RS20005	hypothetical protein	7.402	2.887989201	0.021287369	0.04903453	yes	up	ref_gene	mRNA
FORC47_RS05885	gerPB	spore germination protein GerPB	7.402	2.887989201	0.021287369	0.04903453	yes	up	ref_gene	mRNA
FORC47_RS26560	FORC47_RS26560	acetyltransferase	7.402	2.887989201	0.021287369	0.04903453	yes	up	ref_gene	mRNA
FORC47_RS00420	folB	dihydroneopterin aldolase	2.326	1.218137802	0.021457291	0.049228077	yes	up	ref_gene	mRNA
FORC47_RS19610	dpaA	dipicolinic acid synthetase subunit A	3.877	1.955103397	0.021608945	0.049536344	yes	up	ref_gene	mRNA
FORC47_RS11915	FORC47_RS11915	DUF5519 family protein	3.877	1.955103397	0.021608945	0.049536344	yes	up	ref_gene	mRNA
FORC47_RS15595	FORC47_RS15595	serine hydrolase	3.877	1.955103397	0.021608945	0.049536344	yes	up	ref_gene	mRNA
FORC47_RS12280	glsA	glutaminase GlsA	2.82	1.495671778	0.021728025	0.049749624	yes	up	ref_gene	mRNA
novel0067	-	CarD-like/TRCF domain [Streptococcus pneumoniae]	2.387	1.25540868	-	-	-	up	novel_gene	unknown
novel0074	-	hypothetical protein BA_5478 [Bacillus anthracis str. Ames]	2.178	1.123116338	-	-	-	up	novel_gene	unknown
novel0075	-	hypothetical protein BACI71_120460 [Bacillus mycoides]	4.838	2.274434358	-	-	-	up	novel_gene	unknown
novel0049	-	putative membrane protein [Bacillus cereus AH820]	4.759	2.25055928	-	-	-	up	novel_gene	unknown
novel0044	-	hypothetical protein COJ48_14565 [Bacillus cereus]	3.484	1.800948632	-	-	-	up	novel_gene	unknown
novel0050	-	TSUP family transporter, partial [Bacillus cereus]	5.287	2.402562374	-	-	-	up	novel_gene	unknown
novel0001	-	hypothetical protein HMPREF1014_04791 [Bacillus sp. 7_6_55CFAA_CT2]	2.795	1.482732722	-	-	-	up	novel_gene	unknown
sRNA0141	-	-	4.165	2.058381472	-	-	-	up	sRNA	unknown
sRNA0113	-	-	3.966	1.987524874	-	-	-	up	sRNA	unknown
FORC47_RS24080	FORC47_RS24080	DUF3949 domain-containing protein	0.152	-2.713379555	0	0	yes	down	ref_gene	mRNA
FORC47_RS23805	ald	alanine dehydrogenase	0.242	-2.048272914	0	0	yes	down	ref_gene	mRNA
FORC47_RS21500	FORC47_RS21500	leucine dehydrogenase	0.362	-1.467809437	0	0	yes	down	ref_gene	mRNA
FORC47_RS11145	FORC47_RS11145	hypothetical protein	0.145	-2.788536651	0	0	yes	down	ref_gene	mRNA
FORC47_RS01310	FORC47_RS01310	DUF3948 family protein	0.09	-3.481237655	0	0	yes	down	ref_gene	mRNA
FORC47_RS21480	bfmBAB	3-methyl-2-oxobutanoate dehydrogenase subunit beta	0.465	-1.103357148	0	0	yes	down	ref_gene	mRNA
FORC47_RS21485	bfmBAA	3-methyl-2-oxobutanoate dehydrogenase subunit alpha	0.463	-1.109423304	0	0	yes	down	ref_gene	mRNA
FORC47_RS20020	pyrE	orotate phosphoribosyltransferase	0.398	-1.328590004	0	0	yes	down	ref_gene	mRNA
FORC47_RS21490	lpdA	dihydrolipoyl dehydrogenase	0.422	-1.24488325	0	0	yes	down	ref_gene	mRNA
FORC47_RS08790	FORC47_RS08790	hypothetical protein	0.29	-1.784413124	0	0	yes	down	ref_gene	mRNA
FORC47_RS20025	pyrF	orotidine-5'-phosphate decarboxylase	0.361	-1.468533734	0	0	yes	down	ref_gene	mRNA
FORC47_RS21505	yqiS	phosphate butyryltransferase	0.373	-1.423127369	0	0	yes	down	ref_gene	mRNA
FORC47_RS01005	FORC47_RS01005	DoxX family protein	0.333	-1.585915757	0	0	yes	down	ref_gene	mRNA
FORC47_RS23245	sdhB	succinate dehydrogenase iron-sulfur subunit	0.428	-1.224731905	0	0	yes	down	ref_gene	mRNA
FORC47_RS26805	celF	6-phospho-beta-glucosidase	0.001	-9.544493385	0	0	yes	down	ref_gene	mRNA
FORC47_RS26810	FORC47_RS26810	PTS lactose/cellobiose transporter subunit IIA	0.002	-8.718647343	0	0	yes	down	ref_gene	mRNA
FORC47_RS20045	FORC47_RS20045	carbamoyl phosphate synthase small subunit	0.376	-1.411583918	0	0	yes	down	ref_gene	mRNA
FORC47_RS28120	sodA	superoxide dismutase [Mn]	0.451	-1.147662141	0	0	yes	down	ref_gene	mRNA
FORC47_RS03545	bdhA	(R%2CR)-butanediol dehydrogenase	0.35	-1.513269957	0	0	yes	down	ref_gene	mRNA
FORC47_RS01550	groL	chaperonin GroEL	0.451	-1.15021888	0	0	yes	down	ref_gene	mRNA
FORC47_RS29035	FORC47_RS29035	DUF3221 domain-containing protein	0.392	-1.350742344	0	0	yes	down	ref_gene	mRNA
FORC47_RS28145	FORC47_RS28145	hemolysin III family protein	0.182	-2.458225356	0	0	yes	down	ref_gene	mRNA
FORC47_RS29075	FORC47_RS29075	DUF3221 domain-containing protein	0.392	-1.350742344	0	0	yes	down	ref_gene	mRNA
FORC47_RS21495	buk	butyrate kinase	0.442	-1.179232848	0	0	yes	down	ref_gene	mRNA
FORC47_RS20040	carB	carbamoyl-phosphate synthase large subunit	0.313	-1.675898405	0	0	yes	down	ref_gene	mRNA
FORC47_RS24750	cydB	cytochrome d ubiquinol oxidase subunit II	0.364	-1.459562141	0	0	yes	down	ref_gene	mRNA
FORC47_RS20035	pyrK	dihydroorotate oxidase B electron transfer subunit	0.353	-1.501517594	0	0	yes	down	ref_gene	mRNA
FORC47_RS20030	pyrD	dihydroorotate oxidase B catalytic subunit	0.334	-1.582285156	0	0	yes	down	ref_gene	mRNA
FORC47_RS05665	FORC47_RS05665	YhfH family protein	0.276	-1.856252417	0	0	yes	down	ref_gene	mRNA
FORC47_RS09770	FORC47_RS09770	nitroreductase family protein	0.335	-1.576585365	1.83E-304	6.55E-303	yes	down	ref_gene	mRNA
FORC47_RS01320	FORC47_RS01320	DUF3948 family protein	0.052	-4.270327782	7.98E-289	2.67E-287	yes	down	ref_gene	mRNA
FORC47_RS26415	eno	phosphopyruvate hydratase	0.319	-1.648464838	1.41E-282	4.66E-281	yes	down	ref_gene	mRNA
FORC47_RS11935	FORC47_RS11935	class I SAM-dependent methyltransferase	0.386	-1.375143076	1.72E-278	5.59E-277	yes	down	ref_gene	mRNA
FORC47_RS01145	modB	molybdate ABC transporter permease subunit	0.279	-1.840448664	8.15E-274	2.64E-272	yes	down	ref_gene	mRNA
FORC47_RS26820	FORC47_RS26820	PTS sugar transporter subunit IIB	0.004	-7.928354505	1.31E-265	4.10E-264	yes	down	ref_gene	mRNA
FORC47_RS26800	chbG	chitin disaccharide deacetylase	0.006	-7.284229931	1.28E-215	3.61E-214	yes	down	ref_gene	mRNA
FORC47_RS23960	refZ	forespore capture DNA-binding protein RefZ	0.148	-2.757204951	4.12E-208	1.13E-206	yes	down	ref_gene	mRNA
FORC47_RS24085	FORC47_RS24085	DUF4288 domain-containing protein	0.202	-2.305756438	6.77E-194	1.75E-192	yes	down	ref_gene	mRNA
FORC47_RS05210	FORC47_RS05210	ferritin-like domain-containing protein	0.238	-2.068962317	7.04E-193	1.82E-191	yes	down	ref_gene	mRNA
FORC47_RS08340	FORC47_RS08340	aspartate aminotransferase family protein	0.194	-2.367826222	9.40E-183	2.35E-181	yes	down	ref_gene	mRNA
FORC47_RS00230	FORC47_RS00230	AbrB/MazE/SpoVT family DNA-binding domain-containing protein	0.156	-2.679790288	8.29E-181	2.04E-179	yes	down	ref_gene	mRNA
FORC47_RS17530	hcp	hydroxylamine reductase	0.209	-2.256754862	9.61E-180	2.34E-178	yes	down	ref_gene	mRNA
FORC47_RS01305	FORC47_RS01305	DUF3948 family protein	0.087	-3.514649632	2.03E-179	4.94E-178	yes	down	ref_gene	mRNA
FORC47_RS20870	FORC47_RS20870	hypothetical protein	0.104	-3.260834003	1.02E-157	2.26E-156	yes	down	ref_gene	mRNA
FORC47_RS20890	ptsG	PTS glucose transporter subunit IIABC	0.222	-2.168955007	6.19E-149	1.32E-147	yes	down	ref_gene	mRNA
FORC47_RS01545	groES	co-chaperone GroES	0.165	-2.596559095	2.92E-139	5.93E-138	yes	down	ref_gene	mRNA
FORC47_RS10120	FORC47_RS10120	metal ABC transporter substrate-binding protein	0.357	-1.484609987	2.07E-133	4.06E-132	yes	down	ref_gene	mRNA
FORC47_RS26420	gpmI	2%2C3-bisphosphoglycerate-independent phosphoglycerate mutase	0.417	-1.262737098	1.84E-131	3.54E-130	yes	down	ref_gene	mRNA
FORC47_RS30240	FORC47_RS30240	DUF3221 domain-containing protein	0.347	-1.528256798	3.02E-125	5.56E-124	yes	down	ref_gene	mRNA
FORC47_RS20060	uraA	uracil permease	0.073	-3.769470291	3.57E-109	6.02E-108	yes	down	ref_gene	mRNA
FORC47_RS07480	FORC47_RS07480	class I SAM-dependent methyltransferase	0.234	-2.096111989	4.89E-105	8.10E-104	yes	down	ref_gene	mRNA
FORC47_RS01150	modA	molybdate ABC transporter substrate-binding protein	0.381	-1.393496923	1.29E-99	2.07E-98	yes	down	ref_gene	mRNA
FORC47_RS17510	FORC47_RS17510	ABC transporter ATP-binding protein	0.137	-2.872303684	8.71E-91	1.33E-89	yes	down	ref_gene	mRNA
FORC47_RS21220	ribBA	bifunctional 3%2C4-dihydroxy-2-butanone 4-phosphate synthase/GTP cyclohydrolase II	0.297	-1.750521101	3.25E-90	4.96E-89	yes	down	ref_gene	mRNA
FORC47_RS03165	FORC47_RS03165	VanW family protein	0.128	-2.963759841	4.19E-81	6.08E-80	yes	down	ref_gene	mRNA
FORC47_RS05790	FORC47_RS05790	S-layer homology domain-containing protein	0.275	-1.860977696	9.03E-76	1.25E-74	yes	down	ref_gene	mRNA
FORC47_RS12370	FORC47_RS12370	PAS domain S-box protein	0.327	-1.61169832	1.09E-75	1.51E-74	yes	down	ref_gene	mRNA
FORC47_RS29100	tnpA	IS200/IS605 family transposase	0.207	-2.275312786	3.14E-74	4.29E-73	yes	down	ref_gene	mRNA
FORC47_RS27260	FORC47_RS27260	hypothetical protein	0.093	-3.427160362	3.21E-68	4.13E-67	yes	down	ref_gene	mRNA
FORC47_RS10000	FORC47_RS10000	S8 family peptidase	0.156	-2.676795418	2.62E-63	3.17E-62	yes	down	ref_gene	mRNA
FORC47_RS01330	hppD	4-hydroxyphenylpyruvate dioxygenase	0.415	-1.269992132	6.43E-61	7.58E-60	yes	down	ref_gene	mRNA
FORC47_RS08815	asnB	asparagine synthase (glutamine-hydrolyzing)	0.262	-1.934213486	6.03E-59	6.99E-58	yes	down	ref_gene	mRNA
FORC47_RS09460	FORC47_RS09460	cytidine deaminase	0.426	-1.231490641	2.80E-57	3.17E-56	yes	down	ref_gene	mRNA
FORC47_RS17505	FORC47_RS17505	ABC transporter permease	0.137	-2.86747898	7.34E-57	8.25E-56	yes	down	ref_gene	mRNA
FORC47_RS09150	FORC47_RS09150	ketoacyl-ACP synthase III	0.314	-1.671552052	5.21E-55	5.75E-54	yes	down	ref_gene	mRNA
FORC47_RS25325	FORC47_RS25325	glucose-6-phosphate isomerase	0.465	-1.104563944	3.96E-52	4.24E-51	yes	down	ref_gene	mRNA
FORC47_RS16755	FORC47_RS16755	alpha/beta hydrolase	0.443	-1.175405881	6.30E-52	6.73E-51	yes	down	ref_gene	mRNA
FORC47_RS01325	FORC47_RS01325	DUF3948 family protein	0.049	-4.336451049	6.69E-52	7.14E-51	yes	down	ref_gene	mRNA
FORC47_RS22490	FORC47_RS22490	S8 family serine peptidase	0.223	-2.16398809	6.02E-51	6.35E-50	yes	down	ref_gene	mRNA
FORC47_RS26425	tpiA	triose-phosphate isomerase	0.385	-1.378333824	1.63E-48	1.69E-47	yes	down	ref_gene	mRNA
FORC47_RS30980	FORC47_RS30980	septation ring formation regulator EzrA	0.089	-3.49225539	6.87E-46	6.93E-45	yes	down	ref_gene	mRNA
FORC47_RS21225	ribH	6%2C7-dimethyl-8-ribityllumazine synthase	0.33	-1.600456871	8.03E-45	8.01E-44	yes	down	ref_gene	mRNA
FORC47_RS10720	FORC47_RS10720	DUF4318 domain-containing protein	0.371	-1.430916135	9.60E-41	9.03E-40	yes	down	ref_gene	mRNA
FORC47_RS20065	pyrR	bifunctional pyrimidine operon transcriptional regulator/uracil phosphoribosyltransferase	0.324	-1.62699377	2.13E-40	2.00E-39	yes	down	ref_gene	mRNA
FORC47_RS02160	arcD	arginine-ornithine antiporter	0.478	-1.065522557	6.70E-38	6.04E-37	yes	down	ref_gene	mRNA
FORC47_RS25945	FORC47_RS25945	hypothetical protein	0.347	-1.527598001	8.40E-37	7.42E-36	yes	down	ref_gene	mRNA
FORC47_RS05745	FORC47_RS05745	AraC family transcriptional regulator	0.482	-1.052141308	3.37E-35	2.90E-34	yes	down	ref_gene	mRNA
FORC47_RS18135	FORC47_RS18135	VanW family protein	0.398	-1.328679855	4.21E-35	3.61E-34	yes	down	ref_gene	mRNA
FORC47_RS05205	sigB	RNA polymerase sigma factor SigB	0.17	-2.55282674	5.87E-35	4.99E-34	yes	down	ref_gene	mRNA
FORC47_RS02440	FORC47_RS02440	BH0509 family protein	0.277	-1.852616904	8.05E-35	6.82E-34	yes	down	ref_gene	mRNA
FORC47_RS23315	FORC47_RS23315	DinB family protein	0.418	-1.257890327	1.09E-33	9.12E-33	yes	down	ref_gene	mRNA
FORC47_RS04230	FORC47_RS04230	PTS sugar transporter subunit IIC	0.208	-2.264194218	4.77E-32	3.85E-31	yes	down	ref_gene	mRNA
FORC47_RS20695	FORC47_RS20695	extracellular solute-binding protein	0.129	-2.95977999	9.75E-31	7.73E-30	yes	down	ref_gene	mRNA
FORC47_RS05805	aceA	isocitrate lyase	0.321	-1.639487805	2.11E-30	1.66E-29	yes	down	ref_gene	mRNA
FORC47_RS03350	FORC47_RS03350	phosphotransferase	0.45	-1.152484549	2.28E-30	1.79E-29	yes	down	ref_gene	mRNA
FORC47_RS25950	FORC47_RS25950	MFS transporter	0.181	-2.464799858	3.15E-30	2.47E-29	yes	down	ref_gene	mRNA
FORC47_RS12850	FORC47_RS12850	M3 family oligoendopeptidase	0.476	-1.07211228	6.78E-28	5.14E-27	yes	down	ref_gene	mRNA
FORC47_RS09695	FORC47_RS09695	LLM class flavin-dependent oxidoreductase	0.281	-1.831309545	1.14E-27	8.62E-27	yes	down	ref_gene	mRNA
FORC47_RS05325	FORC47_RS05325	ring-cleaving dioxygenase	0.313	-1.676574535	1.14E-26	8.42E-26	yes	down	ref_gene	mRNA
FORC47_RS17665	FORC47_RS17665	hypothetical protein	0.375	-1.41643899	1.17E-26	8.60E-26	yes	down	ref_gene	mRNA
FORC47_RS01335	FORC47_RS01335	fumarylacetoacetate hydrolase family protein	0.361	-1.469839846	2.32E-26	1.70E-25	yes	down	ref_gene	mRNA
FORC47_RS20625	FORC47_RS20625	hypothetical protein	0.41	-1.285637394	8.26E-26	5.95E-25	yes	down	ref_gene	mRNA
FORC47_RS20685	malD	maltosaccharide ABC transporter permease MalD	0.107	-3.220535256	1.22E-25	8.72E-25	yes	down	ref_gene	mRNA
FORC47_RS05110	FORC47_RS05110	hypothetical protein	0.064	-3.969991794	2.78E-25	1.97E-24	yes	down	ref_gene	mRNA
FORC47_RS08315	FORC47_RS08315	LysE family transporter	0.363	-1.460303598	5.30E-25	3.73E-24	yes	down	ref_gene	mRNA
FORC47_RS17515	FORC47_RS17515	DUF1048 domain-containing protein	0.314	-1.669846122	1.59E-24	1.10E-23	yes	down	ref_gene	mRNA
FORC47_RS07730	FORC47_RS07730	N-acetylmuramoyl-L-alanine amidase	0.333	-1.584946682	3.96E-22	2.60E-21	yes	down	ref_gene	mRNA
FORC47_RS04240	FORC47_RS04240	MupG family TIM beta-alpha barrel fold protein	0.31	-1.691955225	1.08E-21	7.05E-21	yes	down	ref_gene	mRNA
FORC47_RS10410	FORC47_RS10410	GNAT family N-acetyltransferase	0.41	-1.2872301	1.08E-20	6.91E-20	yes	down	ref_gene	mRNA
FORC47_RS26085	nprB	neutral protease NprB	0.264	-1.919365721	2.99E-20	1.88E-19	yes	down	ref_gene	mRNA
FORC47_RS16750	FORC47_RS16750	hypothetical protein	0.461	-1.116487361	1.29E-19	7.97E-19	yes	down	ref_gene	mRNA
FORC47_RS25505	FORC47_RS25505	GyrI-like domain-containing protein	0.346	-1.533010977	1.36E-19	8.36E-19	yes	down	ref_gene	mRNA
FORC47_RS17520	FORC47_RS17520	PadR family transcriptional regulator	0.421	-1.249755395	2.31E-19	1.42E-18	yes	down	ref_gene	mRNA
FORC47_RS10680	FORC47_RS10680	arylamine N-acetyltransferase	0.239	-2.064796161	3.36E-17	1.92E-16	yes	down	ref_gene	mRNA
FORC47_RS14765	FORC47_RS14765	class I SAM-dependent methyltransferase	0.357	-1.484699415	2.17E-16	1.21E-15	yes	down	ref_gene	mRNA
FORC47_RS19165	FORC47_RS19165	PTS fructose transporter subunit IIABC	0.455	-1.137366374	2.92E-16	1.62E-15	yes	down	ref_gene	mRNA
FORC47_RS03635	FORC47_RS03635	DUF2339 domain-containing protein	0.411	-1.281935801	3.50E-16	1.95E-15	yes	down	ref_gene	mRNA
FORC47_RS19310	FORC47_RS19310	hypothetical protein	0.382	-1.38791873	4.01E-16	2.22E-15	yes	down	ref_gene	mRNA
FORC47_RS06050	FORC47_RS06050	DUF2268 domain-containing putative Zn-dependent protease	0.047	-4.400492411	4.56E-16	2.53E-15	yes	down	ref_gene	mRNA
FORC47_RS20790	FORC47_RS20790	3-hydroxybutyrate dehydrogenase	0.382	-1.388362204	1.87E-15	1.02E-14	yes	down	ref_gene	mRNA
FORC47_RS21995	FORC47_RS21995	cysteine hydrolase	0.406	-1.300187505	2.13E-15	1.16E-14	yes	down	ref_gene	mRNA
FORC47_RS03310	treC	alpha%2Calpha-phosphotrehalase	0.499	-1.00278173	1.50E-14	8.03E-14	yes	down	ref_gene	mRNA
FORC47_RS18785	FORC47_RS18785	ring-cleaving dioxygenase	0.424	-1.238376333	3.16E-14	1.67E-13	yes	down	ref_gene	mRNA
FORC47_RS24660	FORC47_RS24660	DUF3986 family protein	0.358	-1.481244609	4.19E-14	2.21E-13	yes	down	ref_gene	mRNA
FORC47_RS05320	FORC47_RS05320	ring-cleaving dioxygenase	0.324	-1.626583972	6.22E-14	3.25E-13	yes	down	ref_gene	mRNA
FORC47_RS16835	rraA	ribonuclease E activity regulator RraA	0.403	-1.310006566	1.36E-13	7.00E-13	yes	down	ref_gene	mRNA
FORC47_RS04480	FORC47_RS04480	type 1 glutamine amidotransferase	0.49	-1.028749181	1.52E-13	7.81E-13	yes	down	ref_gene	mRNA
FORC47_RS02835	FORC47_RS02835	DUF3884 family protein	0.449	-1.154814296	1.91E-13	9.78E-13	yes	down	ref_gene	mRNA
FORC47_RS14190	FORC47_RS14190	DinB family protein	0.2	-2.319296328	2.64E-13	1.34E-12	yes	down	ref_gene	mRNA
FORC47_RS15165	FORC47_RS15165	hypothetical protein	0.357	-1.487649481	3.13E-13	1.59E-12	yes	down	ref_gene	mRNA
FORC47_RS01205	FORC47_RS01205	LacI family DNA-binding transcriptional regulator	0.406	-1.3020855	5.61E-13	2.81E-12	yes	down	ref_gene	mRNA
FORC47_RS28880	FORC47_RS28880	hypothetical protein	0.485	-1.043992376	7.37E-13	3.68E-12	yes	down	ref_gene	mRNA
FORC47_RS26090	FORC47_RS26090	pirin family protein	0.408	-1.291783587	6.73E-12	3.25E-11	yes	down	ref_gene	mRNA
FORC47_RS20710	ugpC	sn-glycerol-3-phosphate ABC transporter ATP-binding protein UgpC	0.181	-2.466853517	1.20E-11	5.72E-11	yes	down	ref_gene	mRNA
FORC47_RS02185	FORC47_RS02185	alpha-glucosidase	0.393	-1.346180388	4.11E-11	1.91E-10	yes	down	ref_gene	mRNA
FORC47_RS17600	FORC47_RS17600	DMT family transporter	0.38	-1.395393851	5.69E-11	2.63E-10	yes	down	ref_gene	mRNA
FORC47_RS18205	FORC47_RS18205	GNAT family N-acetyltransferase	0.385	-1.37879734	7.33E-11	3.38E-10	yes	down	ref_gene	mRNA
FORC47_RS30675	FORC47_RS30675	HAD hydrolase family protein	0.344	-1.539952132	2.57E-10	1.16E-09	yes	down	ref_gene	mRNA
FORC47_RS02190	FORC47_RS02190	PTS transporter subunit IIBC	0.242	-2.046477639	2.58E-10	1.16E-09	yes	down	ref_gene	mRNA
FORC47_RS20690	malC	maltosaccharide ABC transporter permease MalC	0.182	-2.459934103	5.24E-10	2.32E-09	yes	down	ref_gene	mRNA
FORC47_RS23240	FORC47_RS23240	acyl-CoA thioesterase	0.426	-1.232248677	1.30E-09	5.68E-09	yes	down	ref_gene	mRNA
FORC47_RS21215	ribE	riboflavin synthase subunit alpha	0.426	-1.231955952	2.37E-09	1.02E-08	yes	down	ref_gene	mRNA
FORC47_RS10495	FORC47_RS10495	DUF4176 domain-containing protein	0.451	-1.147393677	2.76E-09	1.18E-08	yes	down	ref_gene	mRNA
FORC47_RS17750	amyS	alpha-amylase	0.271	-1.882839845	6.60E-09	2.79E-08	yes	down	ref_gene	mRNA
FORC47_RS08860	FORC47_RS08860	GTP-binding protein	0.228	-2.134378612	9.09E-09	3.80E-08	yes	down	ref_gene	mRNA
FORC47_RS11370	FORC47_RS11370	hypothetical protein	0.359	-1.477361174	1.25E-08	5.21E-08	yes	down	ref_gene	mRNA
FORC47_RS01860	FORC47_RS01860	ArsA family ATPase	0.42	-1.25194106	1.34E-08	5.54E-08	yes	down	ref_gene	mRNA
FORC47_RS11485	FORC47_RS11485	YkvS family protein	0.375	-1.415323216	1.96E-08	8.05E-08	yes	down	ref_gene	mRNA
FORC47_RS04595	alsS	acetolactate synthase AlsS	0.359	-1.476583232	2.04E-08	8.33E-08	yes	down	ref_gene	mRNA
FORC47_RS02610	FORC47_RS02610	GNAT family N-acetyltransferase	0.482	-1.051816017	3.00E-08	1.22E-07	yes	down	ref_gene	mRNA
FORC47_RS02155	argF	ornithine carbamoyltransferase	0.454	-1.138534242	3.48E-08	1.40E-07	yes	down	ref_gene	mRNA
FORC47_RS04220	FORC47_RS04220	PTS lactose/cellobiose transporter subunit IIA	0.256	-1.966671436	1.01E-07	4.00E-07	yes	down	ref_gene	mRNA
FORC47_RS04040	FORC47_RS04040	hypothetical protein	0.477	-1.068229107	1.11E-07	4.34E-07	yes	down	ref_gene	mRNA
FORC47_RS21805	FORC47_RS21805	ABC transporter ATP-binding protein	0.438	-1.191445267	1.15E-07	4.52E-07	yes	down	ref_gene	mRNA
FORC47_RS09645	FORC47_RS09645	substrate-binding domain-containing protein	0.454	-1.138200323	1.53E-07	5.96E-07	yes	down	ref_gene	mRNA
FORC47_RS10835	FORC47_RS10835	GntP family permease	0.447	-1.160373821	1.69E-07	6.55E-07	yes	down	ref_gene	mRNA
FORC47_RS04280	brnQ	branched-chain amino acid transport system II carrier protein	0.348	-1.522030224	3.09E-07	1.17E-06	yes	down	ref_gene	mRNA
FORC47_RS11665	FORC47_RS11665	DUF2441 domain-containing protein	0.042	-4.563221911	5.67E-07	2.12E-06	yes	down	ref_gene	mRNA
FORC47_RS14470	dapA	4-hydroxy-tetrahydrodipicolinate synthase	0.273	-1.870456121	6.36E-07	2.36E-06	yes	down	ref_gene	mRNA
FORC47_RS14465	FORC47_RS14465	aldehyde dehydrogenase family protein	0.431	-1.214821605	7.63E-07	2.82E-06	yes	down	ref_gene	mRNA
FORC47_RS19470	FORC47_RS19470	dipeptidase	0.314	-1.671438208	1.31E-06	4.76E-06	yes	down	ref_gene	mRNA
FORC47_RS02270	FORC47_RS02270	DUF1992 domain-containing protein	0.348	-1.52422778	1.34E-06	4.86E-06	yes	down	ref_gene	mRNA
FORC47_RS13950	pulA	type I pullulanase	0.343	-1.545550885	1.46E-06	5.29E-06	yes	down	ref_gene	mRNA
FORC47_RS27100	FORC47_RS27100	ABC transporter substrate-binding protein	0.437	-1.193540685	1.71E-06	6.17E-06	yes	down	ref_gene	mRNA
FORC47_RS05195	rsbV	anti sigma b factor antagonist RsbV	0.206	-2.276917726	2.03E-06	7.29E-06	yes	down	ref_gene	mRNA
FORC47_RS09025	pyrH	UMP kinase	0.279	-1.839931254	2.51E-06	8.95E-06	yes	down	ref_gene	mRNA
FORC47_RS25670	FORC47_RS25670	cysteine protease StiP family protein	0.409	-1.291334499	2.84E-06	1.01E-05	yes	down	ref_gene	mRNA
FORC47_RS12660	FORC47_RS12660	IS3 family transposase	0.028	-5.179391377	7.93E-06	2.75E-05	yes	down	ref_gene	mRNA
FORC47_RS07720	FORC47_RS07720	hypothetical protein	0.352	-1.504328222	1.42E-05	4.84E-05	yes	down	ref_gene	mRNA
FORC47_RS09010	FORC47_RS09010	ABC transporter permease	0.346	-1.530800433	2.56E-05	8.48E-05	yes	down	ref_gene	mRNA
FORC47_RS04225	FORC47_RS04225	PTS sugar transporter subunit IIB	0.339	-1.559823335	2.80E-05	9.22E-05	yes	down	ref_gene	mRNA
FORC47_RS28450	FORC47_RS28450	Fic family protein	0.332	-1.591791063	3.04E-05	1.00E-04	yes	down	ref_gene	mRNA
FORC47_RS17560	FORC47_RS17560	hypothetical protein	0.101	-3.311683144	3.58E-05	0.000116902	yes	down	ref_gene	mRNA
FORC47_RS02195	FORC47_RS02195	endonuclease/exonuclease/phosphatase family protein	0.295	-1.760667975	3.89E-05	0.0001267	yes	down	ref_gene	mRNA
FORC47_RS27650	FORC47_RS27650	ABC transporter ATP-binding protein	0.284	-1.817486107	4.03E-05	0.000130907	yes	down	ref_gene	mRNA
FORC47_RS19170	pfkB	1-phosphofructokinase	0.322	-1.635572755	5.37E-05	0.000172159	yes	down	ref_gene	mRNA
FORC47_RS23510	FORC47_RS23510	DHA2 family efflux MFS transporter permease subunit	0.445	-1.167293235	5.86E-05	0.000186977	yes	down	ref_gene	mRNA
FORC47_RS08325	FORC47_RS08325	sterol desaturase family protein	0.403	-1.311683144	6.08E-05	0.000193991	yes	down	ref_gene	mRNA
FORC47_RS04600	alsD	alpha-acetolactate decarboxylase	0.231	-2.112010799	6.19E-05	0.000197282	yes	down	ref_gene	mRNA
FORC47_RS05200	rsbW	anti-sigma B factor RsbW	0.405	-1.302694361	9.93E-05	0.00031061	yes	down	ref_gene	mRNA
FORC47_RS14485	FORC47_RS14485	FAD-binding oxidoreductase	0.272	-1.878723737	0.00010444	0.000326359	yes	down	ref_gene	mRNA
FORC47_RS30000	FORC47_RS30000	IS4 family transposase	0.473	-1.080563176	0.000107642	0.000336182	yes	down	ref_gene	mRNA
FORC47_RS12010	FORC47_RS12010	MBL fold metallo-hydrolase	0.484	-1.046477639	0.000120791	0.000376019	yes	down	ref_gene	mRNA
FORC47_RS05240	FORC47_RS05240	general stress protein	0.227	-2.141758143	0.000156821	0.000483713	yes	down	ref_gene	mRNA
FORC47_RS15235	FORC47_RS15235	MFS transporter	0.482	-1.053221468	0.000162924	0.00050146	yes	down	ref_gene	mRNA
FORC47_RS22940	spoIVFA	stage IV sporulation protein SpoIVFA	0.247	-2.018901395	0.000164821	0.00050621	yes	down	ref_gene	mRNA
FORC47_RS14480	FORC47_RS14480	proline racemase family protein	0.302	-1.726720643	0.000250944	0.000755336	yes	down	ref_gene	mRNA
FORC47_RS27040	FORC47_RS27040	DUF1659 domain-containing protein	0.041	-4.61980544	0.000299009	0.000893907	yes	down	ref_gene	mRNA
FORC47_RS16095	arsB	ACR3 family arsenite efflux transporter	0.402	-1.315294398	0.000343956	0.001018187	yes	down	ref_gene	mRNA
FORC47_RS01940	FORC47_RS01940	NupC family nucleoside transporter	0.192	-2.37879734	0.000354688	0.001048332	yes	down	ref_gene	mRNA
FORC47_RS11455	FORC47_RS11455	hypothetical protein	0.124	-3.006828563	0.000371738	0.001094213	yes	down	ref_gene	mRNA
FORC47_RS27095	FORC47_RS27095	MFS transporter	0.473	-1.078564316	0.000399659	0.001172184	yes	down	ref_gene	mRNA
FORC47_RS03495	rbsK	ribokinase	0.297	-1.74944072	0.000410882	0.001202637	yes	down	ref_gene	mRNA
FORC47_RS11545	FORC47_RS11545	hypothetical protein	0.361	-1.469562804	0.000421506	0.001232474	yes	down	ref_gene	mRNA
FORC47_RS26170	FORC47_RS26170	pyrimidine nucleoside transporter NupC	0.482	-1.052632252	0.000471307	0.0013704	yes	down	ref_gene	mRNA
FORC47_RS10415	FORC47_RS10415	metallophosphoesterase	0.405	-1.304029572	0.000565442	0.001628418	yes	down	ref_gene	mRNA
FORC47_RS10575	FORC47_RS10575	class I SAM-dependent methyltransferase	0.307	-1.70363703	0.000641827	0.001840076	yes	down	ref_gene	mRNA
FORC47_RS16115	FORC47_RS16115	DinB family protein	0.439	-1.187854557	0.000667042	0.001910452	yes	down	ref_gene	mRNA
FORC47_RS04005	kdpA	potassium-transporting ATPase subunit KdpA	0.292	-1.777346716	0.000672687	0.001925659	yes	down	ref_gene	mRNA
FORC47_RS28375	rfbB	dTDP-glucose 4%2C6-dehydratase	0.211	-2.241293816	0.001016234	0.002852123	yes	down	ref_gene	mRNA
FORC47_RS07605	FORC47_RS07605	superoxide dismutase	0.211	-2.241293816	0.001016234	0.002852123	yes	down	ref_gene	mRNA
FORC47_RS17595	FORC47_RS17595	DMT family transporter	0.427	-1.22602706	0.001017818	0.002853773	yes	down	ref_gene	mRNA
FORC47_RS05860	FORC47_RS05860	RNA polymerase alpha subunit C-terminal domain-containing protein	0.285	-1.812450517	0.001100572	0.003072274	yes	down	ref_gene	mRNA
FORC47_RS23760	FORC47_RS23760	hypothetical protein	0.141	-2.826256317	0.001184635	0.003294103	yes	down	ref_gene	mRNA
FORC47_RS18730	FORC47_RS18730	hypothetical protein	0.397	-1.334403221	0.001205479	0.003345569	yes	down	ref_gene	mRNA
FORC47_RS25835	FORC47_RS25835	toprim domain-containing protein	0.413	-1.276917726	0.001534938	0.004198915	yes	down	ref_gene	mRNA
FORC47_RS03370	glnH	glutamine ABC transporter substrate-binding protein GlnH	0.053	-4.241293816	0.001876516	0.005084781	yes	down	ref_gene	mRNA
FORC47_RS11150	FORC47_RS11150	AAA family ATPase	0.4	-1.321464165	0.001997971	0.005401119	yes	down	ref_gene	mRNA
FORC47_RS27285	spoIID	stage II sporulation protein D	0.393	-1.34820902	0.002269435	0.006071958	yes	down	ref_gene	mRNA
FORC47_RS15975	FORC47_RS15975	ParM/StbA family protein	0.34	-1.556795642	0.002360086	0.00629979	yes	down	ref_gene	mRNA
FORC47_RS06150	FORC47_RS06150	DUF6035 family protein	0.475	-1.074643947	0.002538899	0.006745678	yes	down	ref_gene	mRNA
FORC47_RS28100	FORC47_RS28100	MFS transporter	0.438	-1.189454885	0.00273484	0.007242777	yes	down	ref_gene	mRNA
FORC47_RS02280	FORC47_RS02280	hypothetical protein	0.235	-2.089290723	0.002849634	0.007529391	yes	down	ref_gene	mRNA
FORC47_RS10600	FORC47_RS10600	VOC family protein	0.059	-4.089290723	0.003503068	0.009133795	yes	down	ref_gene	mRNA
FORC47_RS15170	FORC47_RS15170	short-chain dehydrogenase	0.352	-1.504328222	0.003595211	0.009352772	yes	down	ref_gene	mRNA
FORC47_RS10610	FORC47_RS10610	quinone oxidoreductase	0.429	-1.221928491	0.003643694	0.0094703	yes	down	ref_gene	mRNA
FORC47_RS16090	arsC	arsenate reductase (thioredoxin)	0.366	-1.449880438	0.005437295	0.013861717	yes	down	ref_gene	mRNA
FORC47_RS17445	FORC47_RS17445	metalloregulator ArsR/SmtB family transcription factor	0.401	-1.317915098	0.006325221	0.015990226	yes	down	ref_gene	mRNA
FORC47_RS05635	FORC47_RS05635	YhgE/Pip domain-containing protein	0.476	-1.071368815	0.006515965	0.016443415	yes	down	ref_gene	mRNA
FORC47_RS08530	fliE	flagellar hook-basal body complex protein FliE	0.476	-1.071368815	0.006515965	0.016443415	yes	down	ref_gene	mRNA
FORC47_RS18180	FORC47_RS18180	NUDIX domain-containing protein	0.176	-2.504328222	0.006581468	0.016594101	yes	down	ref_gene	mRNA
FORC47_RS04235	FORC47_RS04235	hypothetical protein	0.336	-1.571442418	0.006652097	0.016764806	yes	down	ref_gene	mRNA
FORC47_RS11445	FORC47_RS11445	LysE family translocator	0.392	-1.352325129	0.007203029	0.017924688	yes	down	ref_gene	mRNA
FORC47_RS15980	FORC47_RS15980	hypothetical protein	0.227	-2.141758143	0.007520501	0.018682267	yes	down	ref_gene	mRNA
FORC47_RS16100	FORC47_RS16100	glyoxalase/bleomycin resistance/dioxygenase family protein	0.264	-1.919365721	0.00778335	0.019243476	yes	down	ref_gene	mRNA
FORC47_RS31015	FORC47_RS31015	hypothetical protein	0.117	-3.089290723	0.008713391	0.02143195	yes	down	ref_gene	mRNA
FORC47_RS03980	FORC47_RS03980	hypothetical protein	0.117	-3.089290723	0.008713391	0.02143195	yes	down	ref_gene	mRNA
FORC47_RS03405	FORC47_RS03405	DUF4367 domain-containing protein	0.334	-1.582330734	0.0112558	0.027241128	yes	down	ref_gene	mRNA
FORC47_RS16915	FORC47_RS16915	hypothetical protein	0.192	-2.37879734	0.011551261	0.027897294	yes	down	ref_gene	mRNA
FORC47_RS21060	FORC47_RS21060	hypothetical protein	0.397	-1.334403221	0.012147918	0.029239698	yes	down	ref_gene	mRNA
FORC47_RS02525	ytaF	sporulation membrane protein YtaF	0.076	-3.726720643	0.012459918	0.029940373	yes	down	ref_gene	mRNA
FORC47_RS08105	FORC47_RS08105	GNAT family N-acetyltransferase	0.244	-2.034842939	0.012673004	0.030388696	yes	down	ref_gene	mRNA
FORC47_RS13540	FORC47_RS13540	protein kinase	0.499	-1.001827882	0.014576365	0.034619623	yes	down	ref_gene	mRNA
FORC47_RS24725	FORC47_RS24725	YczI family protein	0.499	-1.001827882	0.014576365	0.034619623	yes	down	ref_gene	mRNA
FORC47_RS27645	FORC47_RS27645	ABC transporter permease	0.423	-1.241293816	0.015534838	0.036713468	yes	down	ref_gene	mRNA
FORC47_RS01830	FORC47_RS01830	cysteine hydrolase	0.132	-2.919365721	0.016089002	0.037944885	yes	down	ref_gene	mRNA
FORC47_RS05680	FORC47_RS05680	hypothetical protein	0.132	-2.919365721	0.016089002	0.037944885	yes	down	ref_gene	mRNA
FORC47_RS05005	FORC47_RS05005	DUF4352 domain-containing protein	0.478	-1.06620711	0.017048229	0.039944153	yes	down	ref_gene	mRNA
FORC47_RS28695	FORC47_RS28695	IS4 family transposase	0.496	-1.011052209	0.017116605	0.04008797	yes	down	ref_gene	mRNA
FORC47_RS18410	FORC47_RS18410	peptide ABC transporter substrate-binding protein	0.352	-1.504328222	0.017437313	0.040772436	yes	down	ref_gene	mRNA
FORC47_RS04570	FORC47_RS04570	histidine kinase	0.302	-1.726720643	0.020579848	0.047557706	yes	down	ref_gene	mRNA
novel0066	-	hypothetical protein CN450_00565 [Bacillus cereus]	0.291	-1.779962665	-	-	-	down	novel_gene	unknown
novel0058	-	hypothetical protein FORC47_3192 [Bacillus cereus]	0.217	-2.201401089	-	-	-	down	novel_gene	unknown
novel0047	-	hypothetical protein BCN_1419 [Bacillus cereus NC7401]	0.442	-1.178034935	-	-	-	down	novel_gene	unknown
novel0073	-	hypothetical protein BCACH14_23200 [Bacillus cereus]	0.003	-8.22314647	-	-	-	down	novel_gene	unknown
sRNA0112	-	-	0.331	-1.59488241	-	-	-	down	sRNA	unknown
sRNA0095	-	-	0.136	-2.882839845	-	-	-	down	sRNA	unknown
sRNA0154	-	-	0.499	-1.003152904	-	-	-	down	sRNA	unknown
